# Supplementary material for: Opinion Formation by Social Influence: From Experiments to Modeling
Source: PubMed Central journal article supplement (PMC4627778; doi:10.1371/journal.pone.0140406), 2015-10-30
Supplement: pone.0140406.s002.pdf [file pone.0140406.s002.pdf]

S1 Table. Raw data obtained from the experiment.

From left to right, columns correspond to

- question number
- subject ID
- 1st round answer
- 2nd round answer
- reference answer
- 1st round confidence
- 2nd round confidence
- reference confidence

A reference confidence of -1 is indicated for class B questions, for which no reference confidence was provided.

|   |            |           |           |           |   |   |    |
|---|------------|-----------|-----------|-----------|---|---|----|
| 1 | 1398776357 | 8.000e+00 | 1.000e+01 | 1.120e+01 | 2 | 2 | -1 |
| 1 | 1398887847 | 5.000e+00 | 8.000e+00 | 1.120e+01 | 3 | 3 | -1 |
| 1 | 1398892516 | 1.600e+01 | 1.600e+01 | 1.120e+01 | 0 | 1 | -1 |
| 1 | 1417185554 | 9.000e+00 | 9.000e+00 | 1.120e+01 | 4 | 3 | -1 |
| 1 | 1398888387 | 1.500e+01 | 1.500e+01 | 1.120e+01 | 4 | 5 | -1 |
| 1 | 1398891149 | 6.000e+00 | 8.000e+00 | 1.120e+01 | 3 | 3 | -1 |
| 1 | 1398776407 | 1.500e+01 | 1.500e+01 | 1.120e+01 | 2 | 3 | -1 |
| 1 | 1398891375 | 4.000e+00 | 6.000e+00 | 1.120e+01 | 3 | 2 | -1 |
| 1 | 1398776634 | 5.000e+00 | 5.000e+00 | 1.120e+01 | 1 | 1 | -1 |
| 1 | 1398786088 | 1.200e+01 | 1.200e+01 | 1.120e+01 | 3 | 3 | -1 |
| 1 | 1398892622 | 7.000e+00 | 1.100e+01 | 1.120e+01 | 1 | 3 | -1 |
| 1 | 1398888074 | 1.000e+01 | 1.000e+01 | 1.120e+01 | 1 | 1 | -1 |
| 1 | 1398867272 | 5.000e+00 | 1.000e+01 | 1.120e+01 | 2 | 3 | -1 |
| 1 | 1398862805 | 5.000e+00 | 1.100e+01 | 1.120e+01 | 0 | 4 | -1 |
| 1 | 1398869031 | 7.000e+00 | 7.000e+00 | 1.120e+01 | 2 | 2 | -1 |
| 1 | 1398889535 | 2.500e+01 | 2.000e+01 | 1.120e+01 | 0 | 0 | -1 |
| 1 | 1398888718 | 8.000e+00 | 1.000e+01 | 1.120e+01 | 0 | 2 | -1 |
| 1 | 1398785751 | 1.500e+01 | 1.500e+01 | 1.120e+01 | 2 | 2 | -1 |
| 1 | 1398889130 | 1.200e+01 | 1.200e+01 | 1.120e+01 | 2 | 2 | -1 |
| 1 | 1398891104 | 1.000e+01 | 1.000e+01 | 1.120e+01 | 3 | 4 | -1 |
| 1 | 1398865276 | 3.000e+01 | 1.500e+01 | 1.120e+01 | 4 | 4 | -1 |
| 1 | 1398888893 | 7.300e+01 | 1.300e+01 | 1.120e+01 | 0 | 0 | -1 |
| 1 | 1398891402 | 3.000e+00 | 8.000e+00 | 1.120e+01 | 1 | 3 | -1 |
| 1 | 1398888834 | 1.200e+01 | 1.200e+01 | 1.120e+01 | 1 | 1 | -1 |
| 1 | 1398784937 | 1.000e+01 | 1.100e+01 | 1.120e+01 | 1 | 1 | -1 |
| 1 | 1398888358 | 5.000e+00 | 5.000e+00 | 1.120e+01 | 3 | 3 | -1 |
| 1 | 1398890003 | 4.000e+00 | 4.000e+00 | 1.120e+01 | 3 | 3 | -1 |
| 1 | 1398891430 | 1.000e+01 | 1.000e+01 | 1.120e+01 | 0 | 3 | -1 |
| 1 | 1398776404 | 5.000e+00 | 8.000e+00 | 1.120e+01 | 1 | 3 | -1 |
| 1 | 1398867266 | 2.000e+01 | 1.400e+01 | 1.120e+01 | 2 | 3 | -1 |
| 1 | 1398778952 | 3.000e+01 | 1.000e+01 | 1.120e+01 | 3 | 3 | -1 |
| 1 | 1398865301 | 2.500e+01 | 2.500e+01 | 1.120e+01 | 2 | 2 | -1 |
| 1 | 1398889925 | 9.000e+00 | 9.000e+00 | 1.120e+01 | 1 | 1 | -1 |
| 1 | 1398776517 | 5.000e+00 | 1.000e+01 | 1.120e+01 | 3 | 4 | -1 |
| 1 | 1408795563 | 1.000e+01 | 1.000e+01 | 1.120e+01 | 3 | 4 | -1 |
| 1 | 1408809584 | 1.000e+01 | 1.100e+01 | 1.120e+01 | 1 | 3 | -1 |
| 1 | 1408805301 | 7.000e+00 | 8.000e+00 | 1.120e+01 | 0 | 0 | -1 |
| 1 | 1408805468 | 4.000e+01 | 1.500e+01 | 1.120e+01 | 4 | 2 | -1 |
| 1 | 1408812462 | 1.700e+01 | 1.700e+01 | 1.120e+01 | 2 | 3 | -1 |
| 1 | 1408808932 | 3.000e+01 | 3.000e+01 | 1.120e+01 | 3 | 3 | -1 |
| 1 | 1408803130 | 5.000e+00 | 1.000e+01 | 1.120e+01 | 2 | 2 | -1 |
| 1 | 1408805005 | 5.000e+00 | 1.000e+01 | 1.120e+01 | 2 | 3 | -1 |
| 1 | 1408810956 | 1.500e+01 | 1.300e+01 | 1.120e+01 | 2 | 3 | -1 |
| 1 | 1408815379 | 8.000e+00 | 8.000e+00 | 1.120e+01 | 1 | 1 | -1 |
| 1 | 1408803877 | 1.000e+01 | 1.000e+01 | 1.120e+01 | 1 | 2 | -1 |
| 1 | 1408806920 | 7.000e+00 | 7.000e+00 | 1.120e+01 | 2 | 2 | -1 |
| 1 | 1408807550 | 1.000e+01 | 1.000e+01 | 1.120e+01 | 2 | 4 | -1 |
| 1 | 1408804745 | 1.000e+01 | 1.000e+01 | 1.120e+01 | 1 | 1 | -1 |
| 1 | 1408807503 | 1.000e+01 | 1.000e+01 | 1.120e+01 | 4 | 4 | -1 |
| 1 | 1408807144 | 1.200e+01 | 1.200e+01 | 1.120e+01 | 1 | 3 | -1 |
| 1 | 1408809849 | 2.100e+01 | 2.100e+01 | 1.120e+01 | 4 | 4 | -1 |

|   |            |           |           |           |   |   |    |
|---|------------|-----------|-----------|-----------|---|---|----|
| 1 | 1408803676 | 3.000e+01 | 1.500e+01 | 1.120e+01 | 1 | 1 | -1 |
| 1 | 1408817241 | 1.500e+01 | 1.500e+01 | 1.120e+01 | 1 | 3 | -1 |
| 1 | 1408811947 | 7.000e+00 | 9.000e+00 | 1.120e+01 | 3 | 3 | -1 |
| 1 | 1408811461 | 1.200e+01 | 1.200e+01 | 1.120e+01 | 2 | 2 | -1 |
| 1 | 1408814406 | 1.000e+01 | 1.100e+01 | 1.120e+01 | 2 | 5 | -1 |
| 1 | 1408806191 | 1.500e+01 | 1.500e+01 | 1.120e+01 | 3 | 3 | -1 |
| 1 | 1408814584 | 1.000e+01 | 1.100e+01 | 1.120e+01 | 0 | 3 | -1 |
| 1 | 1408819661 | 3.000e+01 | 2.500e+01 | 1.120e+01 | 0 | 4 | -1 |
| 1 | 1408812882 | 1.400e+01 | 1.200e+01 | 1.120e+01 | 3 | 3 | -1 |
| 1 | 1408808711 | 1.200e+01 | 1.200e+01 | 1.120e+01 | 5 | 5 | -1 |
| 1 | 1408801183 | 8.000e+00 | 8.000e+00 | 1.120e+01 | 4 | 4 | -1 |
| 1 | 1408809769 | 1.000e+01 | 1.000e+01 | 1.120e+01 | 2 | 2 | -1 |
| 1 | 1408799162 | 1.500e+01 | 1.500e+01 | 1.120e+01 | 4 | 4 | -1 |
| 1 | 1408805091 | 1.200e+01 | 1.200e+01 | 1.120e+01 | 4 | 4 | -1 |
| 1 | 1408806651 | 3.000e+01 | 1.500e+01 | 1.120e+01 | 0 | 1 | -1 |
| 1 | 1408816332 | 1.200e+01 | 1.200e+01 | 1.120e+01 | 3 | 3 | -1 |
| 1 | 1408809326 | 1.000e+01 | 1.000e+01 | 1.120e+01 | 2 | 2 | -1 |
| 1 | 1408808791 | 1.000e+01 | 1.000e+01 | 1.120e+01 | 3 | 3 | -1 |
| 1 | 1408801643 | 1.100e+01 | 1.100e+01 | 1.120e+01 | 1 | 3 | -1 |
| 1 | 1408807809 | 7.000e+00 | 1.100e+01 | 1.120e+01 | 1 | 3 | -1 |
| 1 | 1408797111 | 7.000e+00 | 7.000e+00 | 1.120e+01 | 3 | 3 | -1 |
| 1 | 1408808623 | 8.000e+00 | 8.000e+00 | 1.120e+01 | 2 | 2 | -1 |
| 1 | 1408800367 | 1.000e+01 | 1.000e+01 | 1.120e+01 | 3 | 4 | -1 |
| 1 | 1408808143 | 1.200e+01 | 1.200e+01 | 1.120e+01 | 3 | 4 | -1 |
| 1 | 1408802365 | 1.500e+01 | 1.000e+01 | 1.120e+01 | 1 | 4 | -1 |
| 1 | 1408812007 | 8.000e+00 | 1.100e+01 | 1.120e+01 | 3 | 3 | -1 |
| 1 | 1408812647 | 7.900e+01 | 5.000e+01 | 1.120e+01 | 1 | 1 | -1 |
| 1 | 1408805344 | 1.000e+01 | 1.000e+01 | 1.120e+01 | 0 | 0 | -1 |
| 1 | 1408816236 | 1.000e+01 | 1.000e+01 | 1.120e+01 | 3 | 3 | -1 |
| 1 | 1408814110 | 3.000e+01 | 2.500e+01 | 1.120e+01 | 2 | 2 | -1 |
| 1 | 1408802237 | 1.600e+01 | 1.600e+01 | 1.120e+01 | 2 | 4 | -1 |
| 1 | 1408811941 | 1.200e+01 | 1.200e+01 | 1.120e+01 | 2 | 2 | -1 |
| 1 | 1408820913 | 1.300e+01 | 1.300e+01 | 1.120e+01 | 2 | 3 | -1 |
| 1 | 1408812832 | 1.200e+01 | 1.200e+01 | 1.120e+01 | 4 | 4 | -1 |
| 2 | 1398776357 | 4.000e+02 | 4.000e+02 | 9.000e+02 | 2 | 2 | 4  |
| 2 | 1398887847 | 2.500e+02 | 2.500e+02 | 9.000e+02 | 1 | 1 | 4  |
| 2 | 1398892516 | 1.000e+03 | 1.000e+03 | 9.000e+02 | 0 | 1 | 4  |
| 2 | 1417185554 | 7.000e+02 | 7.000e+02 | 9.000e+02 | 3 | 3 | 4  |
| 2 | 1398888387 | 5.000e+02 | 5.000e+02 | 9.000e+02 | 3 | 3 | 4  |
| 2 | 1398891149 | 1.500e+03 | 1.000e+02 | 9.000e+02 | 2 | 3 | 4  |
| 2 | 1398776407 | 3.000e+02 | 3.000e+02 | 9.000e+02 | 3 | 3 | 4  |
| 2 | 1398891375 | 2.500e+03 | 2.500e+03 | 9.000e+02 | 3 | 3 | 4  |
| 2 | 1398776634 | 5.000e+02 | 9.000e+02 | 9.000e+02 | 0 | 1 | 4  |
| 2 | 1398786088 | 2.000e+03 | 2.000e+03 | 9.000e+02 | 3 | 3 | 4  |
| 2 | 1398892622 | 2.000e+03 | 1.300e+03 | 9.000e+02 | 0 | 1 | 4  |
| 2 | 1398888074 | 4.000e+02 | 4.000e+02 | 9.000e+02 | 1 | 1 | 4  |
| 2 | 1398867272 | 1.000e+02 | 2.000e+02 | 9.000e+02 | 0 | 1 | 4  |
| 2 | 1398862805 | 6.000e+02 | 8.000e+02 | 9.000e+02 | 0 | 3 | 4  |
| 2 | 1398869031 | 5.000e+01 | 5.000e+01 | 9.000e+02 | 0 | 0 | 4  |
| 2 | 1398889535 | 1.000e+02 | 9.000e+02 | 9.000e+02 | 1 | 2 | 4  |
| 2 | 1398888718 | 1.200e+03 | 1.200e+03 | 9.000e+02 | 1 | 1 | 4  |
| 2 | 1398785751 | 8.000e+02 | 8.000e+02 | 9.000e+02 | 3 | 3 | 4  |
| 2 | 1398889130 | 5.000e+06 | 5.000e+06 | 9.000e+02 | 1 | 1 | 4  |
| 2 | 1398891104 | 2.000e+02 | 8.000e+02 | 9.000e+02 | 0 | 3 | 4  |
| 2 | 1398865276 | 4.000e+02 | 9.000e+02 | 9.000e+02 | 0 | 3 | 4  |
| 2 | 1398888893 | 1.300e+01 | 8.000e+02 | 9.000e+02 | 0 | 0 | 4  |
| 2 | 1398891402 | 4.000e+02 | 9.000e+02 | 9.000e+02 | 3 | 3 | 4  |
| 2 | 1398888834 | 6.000e+02 | 8.000e+02 | 9.000e+02 | 2 | 3 | 4  |
| 2 | 1398784937 | 3.000e+02 | 9.000e+02 | 9.000e+02 | 0 | 1 | 4  |
| 2 | 1398888358 | 3.000e+02 | 8.000e+02 | 9.000e+02 | 0 | 0 | 4  |
| 2 | 1398890003 | 4.000e+02 | 7.500e+04 | 9.000e+02 | 2 | 4 | 4  |
| 2 | 1398891430 | 4.000e+02 | 5.000e+02 | 9.000e+02 | 3 | 3 | 4  |
| 2 | 1398776404 | 2.000e+02 | 2.500e+02 | 9.000e+02 | 2 | 3 | 4  |
| 2 | 1398867266 | 3.000e+03 | 1.000e+03 | 9.000e+02 | 2 | 4 | 4  |
| 2 | 1398778952 | 2.000e+02 | 2.000e+02 | 9.000e+02 | 1 | 1 | 4  |
| 2 | 1398865301 | 2.300e+03 | 1.500e+03 | 9.000e+02 | 2 | 3 | 4  |
| 2 | 1398889925 | 9.500e+02 | 9.500e+02 | 9.000e+02 | 3 | 3 | 4  |
| 2 | 1398776517 | 5.000e+01 | 1.000e+03 | 9.000e+02 | 0 | 0 | 4  |
| 2 | 1408795563 | 1.900e+03 | 1.000e+02 | 9.000e+02 | 1 | 3 | 4  |

|   |            |           |           |           |   |   |    |
|---|------------|-----------|-----------|-----------|---|---|----|
| 2 | 1408809584 | 6.000e+02 | 7.000e+02 | 9.000e+02 | 4 | 4 | 4  |
| 2 | 1408805301 | 1.200e+03 | 1.200e+03 | 9.000e+02 | 2 | 2 | 4  |
| 2 | 1408805468 | 1.000e+03 | 1.000e+03 | 9.000e+02 | 5 | 5 | 4  |
| 2 | 1408812462 | 8.000e+02 | 8.000e+02 | 9.000e+02 | 3 | 3 | 4  |
| 2 | 1408808932 | 5.000e+01 | 1.000e+02 | 9.000e+02 | 0 | 2 | 4  |
| 2 | 1408803130 | 1.300e+03 | 1.000e+03 | 9.000e+02 | 3 | 3 | 4  |
| 2 | 1408805005 | 7.000e+01 | 1.500e+02 | 9.000e+02 | 0 | 3 | 4  |
| 2 | 1408810956 | 7.500e+02 | 7.500e+02 | 9.000e+02 | 2 | 3 | 4  |
| 2 | 1408815379 | 7.000e+02 | 7.000e+02 | 9.000e+02 | 3 | 4 | 4  |
| 2 | 1408803877 | 6.000e+02 | 9.000e+02 | 9.000e+02 | 1 | 4 | 4  |
| 2 | 1408806920 | 2.000e+03 | 1.200e+03 | 9.000e+02 | 1 | 1 | 4  |
| 2 | 1408807550 | 2.000e+03 | 1.500e+03 | 9.000e+02 | 3 | 4 | 4  |
| 2 | 1408804745 | 3.000e+02 | 3.000e+02 | 9.000e+02 | 1 | 1 | 4  |
| 2 | 1408807503 | 9.000e+02 | 9.000e+02 | 9.000e+02 | 3 | 3 | 4  |
| 2 | 1408807144 | 7.000e+02 | 8.000e+02 | 9.000e+02 | 4 | 4 | 4  |
| 2 | 1408809849 | 2.500e+03 | 1.500e+03 | 9.000e+02 | 3 | 3 | 4  |
| 2 | 1408803676 | 1.300e+03 | 1.000e+03 | 9.000e+02 | 3 | 3 | 4  |
| 2 | 1408817241 | 2.000e+02 | 9.000e+02 | 9.000e+02 | 0 | 3 | 4  |
| 2 | 1408811947 | 7.000e+02 | 8.000e+02 | 9.000e+02 | 3 | 3 | 4  |
| 2 | 1408811461 | 2.000e+03 | 2.000e+03 | 9.000e+02 | 3 | 3 | 4  |
| 2 | 1408814406 | 7.000e+02 | 7.000e+02 | 9.000e+02 | 4 | 4 | 4  |
| 2 | 1408806191 | 2.000e+03 | 1.000e+03 | 9.000e+02 | 3 | 3 | 4  |
| 2 | 1408814584 | 1.500e+03 | 9.000e+02 | 9.000e+02 | 0 | 3 | 4  |
| 2 | 1408819661 | 4.000e+02 | 9.000e+02 | 9.000e+02 | 0 | 0 | 4  |
| 2 | 1408812882 | 9.000e+02 | 9.000e+02 | 9.000e+02 | 3 | 3 | 4  |
| 2 | 1408808711 | 1.600e+03 | 1.600e+03 | 9.000e+02 | 3 | 3 | 4  |
| 2 | 1408801183 | 1.000e+03 | 1.000e+03 | 9.000e+02 | 4 | 4 | 4  |
| 2 | 1408809769 | 3.000e+02 | 9.000e+02 | 9.000e+02 | 0 | 2 | 4  |
| 2 | 1408799162 | 1.500e+03 | 1.500e+03 | 9.000e+02 | 3 | 3 | 4  |
| 2 | 1408805091 | 1.000e+03 | 1.000e+03 | 9.000e+02 | 3 | 3 | 4  |
| 2 | 1408806651 | 7.500e+02 | 7.500e+02 | 9.000e+02 | 4 | 4 | 4  |
| 2 | 1408816332 | 8.000e+02 | 8.000e+02 | 9.000e+02 | 4 | 4 | 4  |
| 2 | 1408809326 | 9.000e+02 | 9.000e+02 | 9.000e+02 | 2 | 3 | 4  |
| 2 | 1408808791 | 6.000e+02 | 7.000e+02 | 9.000e+02 | 4 | 4 | 4  |
| 2 | 1408801643 | 9.000e+02 | 9.000e+02 | 9.000e+02 | 3 | 3 | 4  |
| 2 | 1408807809 | 1.200e+03 | 1.000e+03 | 9.000e+02 | 2 | 2 | 4  |
| 2 | 1408797111 | 8.000e+02 | 8.000e+02 | 9.000e+02 | 3 | 3 | 4  |
| 2 | 1408808623 | 7.500e+02 | 7.000e+02 | 9.000e+02 | 4 | 4 | 4  |
| 2 | 1408800367 | 9.000e+02 | 9.000e+02 | 9.000e+02 | 4 | 4 | 4  |
| 2 | 1408808143 | 1.000e+02 | 1.000e+02 | 9.000e+02 | 0 | 0 | 4  |
| 2 | 1408802365 | 9.000e+02 | 9.000e+02 | 9.000e+02 | 4 | 5 | 4  |
| 2 | 1408812007 | 2.500e+03 | 2.500e+03 | 9.000e+02 | 3 | 3 | 4  |
| 2 | 1408812647 | 9.000e+02 | 9.000e+02 | 9.000e+02 | 2 | 4 | 4  |
| 2 | 1408805344 | 9.000e+02 | 9.000e+02 | 9.000e+02 | 4 | 4 | 4  |
| 2 | 1408816236 | 8.000e+02 | 8.500e+02 | 9.000e+02 | 3 | 4 | 4  |
| 2 | 1408814110 | 5.000e+02 | 9.000e+02 | 9.000e+02 | 0 | 0 | 4  |
| 2 | 1408802237 | 7.500e+02 | 7.500e+02 | 9.000e+02 | 4 | 4 | 4  |
| 2 | 1408811941 | 9.000e+02 | 9.000e+02 | 9.000e+02 | 2 | 2 | 4  |
| 2 | 1408820913 | 1.400e+04 | 1.400e+04 | 9.000e+02 | 2 | 2 | 4  |
| 2 | 1408812832 | 7.000e+02 | 7.000e+02 | 9.000e+02 | 4 | 5 | 4  |
| 3 | 1398776357 | 9.000e+01 | 9.000e+01 | 7.520e+01 | 3 | 3 | -1 |
| 3 | 1398887847 | 4.000e+01 | 4.000e+01 | 7.520e+01 | 4 | 4 | -1 |
| 3 | 1398892516 | 8.000e+01 | 8.000e+01 | 7.520e+01 | 2 | 3 | -1 |
| 3 | 1417185554 | 4.500e+01 | 4.500e+01 | 7.520e+01 | 3 | 2 | -1 |
| 3 | 1398888387 | 1.000e+00 | 7.000e+01 | 7.520e+01 | 4 | 4 | -1 |
| 3 | 1398891149 | 1.200e+02 | 9.000e+01 | 7.520e+01 | 3 | 3 | -1 |
| 3 | 1398776407 | 1.000e+02 | 1.000e+02 | 7.520e+01 | 3 | 3 | -1 |
| 3 | 1398891375 | 1.200e+02 | 1.000e+02 | 7.520e+01 | 3 | 3 | -1 |
| 3 | 1398776634 | 7.000e+01 | 7.000e+01 | 7.520e+01 | 2 | 2 | -1 |
| 3 | 1398786088 | 5.000e+01 | 7.000e+01 | 7.520e+01 | 3 | 3 | -1 |
| 3 | 1398892622 | 2.500e+00 | 2.000e+00 | 7.520e+01 | 3 | 3 | -1 |
| 3 | 1398888074 | 2.000e+00 | 1.000e+00 | 7.520e+01 | 1 | 1 | -1 |
| 3 | 1398867272 | 6.000e+01 | 7.000e+01 | 7.520e+01 | 3 | 3 | -1 |
| 3 | 1398862805 | 1.000e+02 | 1.000e+02 | 7.520e+01 | 3 | 3 | -1 |
| 3 | 1398869031 | 1.000e+02 | 8.000e+01 | 7.520e+01 | 3 | 4 | -1 |
| 3 | 1398889535 | 1.200e+02 | 1.000e+02 | 7.520e+01 | 1 | 1 | -1 |
| 3 | 1398888718 | 1.000e+00 | 8.000e+01 | 7.520e+01 | 2 | 3 | -1 |
| 3 | 1398785751 | 6.000e+01 | 6.000e+01 | 7.520e+01 | 3 | 3 | -1 |
| 3 | 1398889130 | 1.000e+02 | 1.000e+02 | 7.520e+01 | 3 | 3 | -1 |

|   |            |           |           |           |   |   |    |
|---|------------|-----------|-----------|-----------|---|---|----|
| 3 | 1398891104 | 1.000e+00 | 1.000e+00 | 7.520e+01 | 5 | 5 | -1 |
| 3 | 1398865276 | 2.000e+01 | 7.000e+01 | 7.520e+01 | 4 | 4 | -1 |
| 3 | 1398888893 | 1.300e+00 | 7.000e+01 | 7.520e+01 | 0 | 0 | -1 |
| 3 | 1398891402 | 1.150e+00 | 1.150e+00 | 7.520e+01 | 3 | 3 | -1 |
| 3 | 1398888834 | 1.000e+02 | 8.000e+01 | 7.520e+01 | 1 | 1 | -1 |
| 3 | 1398784937 | 1.000e+02 | 1.000e+02 | 7.520e+01 | 3 | 3 | -1 |
| 3 | 1398888358 | 8.000e+01 | 8.000e+01 | 7.520e+01 | 3 | 3 | -1 |
| 3 | 1398890003 | 1.200e+02 | 1.200e+02 | 7.520e+01 | 4 | 4 | -1 |
| 3 | 1398891430 | 1.800e+00 | 1.000e+02 | 7.520e+01 | 4 | 4 | -1 |
| 3 | 1398776404 | 2.000e+03 | 1.500e+03 | 7.520e+01 | 3 | 3 | -1 |
| 3 | 1398867266 | 1.200e+02 | 8.000e+01 | 7.520e+01 | 3 | 4 | -1 |
| 3 | 1398778952 | 9.000e+01 | 7.500e+01 | 7.520e+01 | 4 | 4 | -1 |
| 3 | 1398865301 | 1.000e+00 | 8.000e+01 | 7.520e+01 | 2 | 2 | -1 |
| 3 | 1398889925 | 8.000e+01 | 8.000e+01 | 7.520e+01 | 4 | 4 | -1 |
| 3 | 1398776517 | 8.000e+01 | 8.000e+01 | 7.520e+01 | 3 | 3 | -1 |
| 3 | 1408795563 | 1.200e+02 | 1.200e+02 | 7.520e+01 | 3 | 3 | -1 |
| 3 | 1408809584 | 7.500e+01 | 7.500e+01 | 7.520e+01 | 4 | 4 | -1 |
| 3 | 1408805301 | 1.400e+02 | 1.400e+02 | 7.520e+01 | 3 | 1 | -1 |
| 3 | 1408805468 | 7.000e+01 | 7.000e+01 | 7.520e+01 | 3 | 4 | -1 |
| 3 | 1408812462 | 5.000e+01 | 7.000e+01 | 7.520e+01 | 3 | 3 | -1 |
| 3 | 1408808932 | 1.000e+02 | 1.000e+02 | 7.520e+01 | 3 | 3 | -1 |
| 3 | 1408803130 | 1.000e+00 | 1.000e+00 | 7.520e+01 | 3 | 3 | -1 |
| 3 | 1408805005 | 1.400e+00 | 1.050e+02 | 7.520e+01 | 1 | 2 | -1 |
| 3 | 1408810956 | 1.250e+02 | 1.000e+02 | 7.520e+01 | 3 | 3 | -1 |
| 3 | 1408815379 | 1.200e+02 | 1.000e+02 | 7.520e+01 | 3 | 3 | -1 |
| 3 | 1408803877 | 1.200e+02 | 1.000e+02 | 7.520e+01 | 2 | 2 | -1 |
| 3 | 1408806920 | 1.000e+02 | 1.000e+02 | 7.520e+01 | 3 | 3 | -1 |
| 3 | 1408807550 | 8.000e+01 | 8.000e+01 | 7.520e+01 | 3 | 4 | -1 |
| 3 | 1408804745 | 8.000e+01 | 8.000e+01 | 7.520e+01 | 3 | 3 | -1 |
| 3 | 1408807503 | 1.000e+02 | 1.000e+02 | 7.520e+01 | 4 | 4 | -1 |
| 3 | 1408807144 | 9.000e+01 | 9.000e+01 | 7.520e+01 | 4 | 4 | -1 |
| 3 | 1408809849 | 1.000e+02 | 8.500e+01 | 7.520e+01 | 4 | 3 | -1 |
| 3 | 1408803676 | 1.200e+02 | 1.100e+02 | 7.520e+01 | 3 | 3 | -1 |
| 3 | 1408817241 | 1.000e+02 | 1.000e+02 | 7.520e+01 | 2 | 3 | -1 |
| 3 | 1408811947 | 8.500e+01 | 8.000e+01 | 7.520e+01 | 3 | 3 | -1 |
| 3 | 1408811461 | 8.500e+01 | 8.000e+01 | 7.520e+01 | 3 | 3 | -1 |
| 3 | 1408814406 | 2.500e+02 | 7.500e+01 | 7.520e+01 | 2 | 5 | -1 |
| 3 | 1408806191 | 1.000e+02 | 1.000e+02 | 7.520e+01 | 4 | 4 | -1 |
| 3 | 1408814584 | 1.000e+02 | 8.000e+01 | 7.520e+01 | 3 | 3 | -1 |
| 3 | 1408819661 | 8.000e+01 | 8.000e+01 | 7.520e+01 | 4 | 4 | -1 |
| 3 | 1408812882 | 7.000e+01 | 7.000e+01 | 7.520e+01 | 3 | 4 | -1 |
| 3 | 1408808711 | 5.000e+01 | 5.000e+01 | 7.520e+01 | 4 | 4 | -1 |
| 3 | 1408801183 | 1.000e+02 | 7.500e+01 | 7.520e+01 | 4 | 4 | -1 |
| 3 | 1408809769 | 1.000e+02 | 1.000e+02 | 7.520e+01 | 3 | 3 | -1 |
| 3 | 1408799162 | 1.100e+02 | 1.100e+02 | 7.520e+01 | 4 | 4 | -1 |
| 3 | 1408805091 | 1.300e+00 | 1.300e+02 | 7.520e+01 | 4 | 4 | -1 |
| 3 | 1408806651 | 9.000e+01 | 7.500e+01 | 7.520e+01 | 4 | 4 | -1 |
| 3 | 1408816332 | 1.000e+02 | 7.500e+01 | 7.520e+01 | 4 | 4 | -1 |
| 3 | 1408809326 | 1.200e+02 | 1.200e+02 | 7.520e+01 | 3 | 3 | -1 |
| 3 | 1408808791 | 1.200e+02 | 1.000e+02 | 7.520e+01 | 4 | 3 | -1 |
| 3 | 1408801643 | 1.000e+02 | 1.000e+02 | 7.520e+01 | 4 | 3 | -1 |
| 3 | 1408807809 | 9.000e+01 | 8.000e+01 | 7.520e+01 | 4 | 3 | -1 |
| 3 | 1408797111 | 9.000e+01 | 9.000e+01 | 7.520e+01 | 4 | 4 | -1 |
| 3 | 1408808623 | 6.500e+01 | 6.500e+01 | 7.520e+01 | 3 | 3 | -1 |
| 3 | 1408800367 | 1.200e+02 | 1.000e+02 | 7.520e+01 | 3 | 3 | -1 |
| 3 | 1408808143 | 1.000e+00 | 1.000e+00 | 7.520e+01 | 4 | 3 | -1 |
| 3 | 1408802365 | 9.000e+01 | 7.500e+01 | 7.520e+01 | 4 | 4 | -1 |
| 3 | 1408812007 | 1.300e+02 | 1.300e+02 | 7.520e+01 | 4 | 5 | -1 |
| 3 | 1408812647 | 1.300e+02 | 1.300e+02 | 7.520e+01 | 3 | 3 | -1 |
| 3 | 1408805344 | 1.000e+02 | 1.000e+02 | 7.520e+01 | 3 | 3 | -1 |
| 3 | 1408816236 | 6.000e+01 | 7.000e+01 | 7.520e+01 | 3 | 3 | -1 |
| 3 | 1408814110 | 9.000e+01 | 8.000e+01 | 7.520e+01 | 4 | 4 | -1 |
| 3 | 1408802237 | 5.000e+01 | 7.000e+01 | 7.520e+01 | 3 | 4 | -1 |
| 3 | 1408811941 | 7.000e+01 | 7.000e+01 | 7.520e+01 | 3 | 3 | -1 |
| 3 | 1408820913 | 1.000e+02 | 8.000e+01 | 7.520e+01 | 3 | 3 | -1 |
| 3 | 1408812832 | 9.000e+01 | 8.000e+01 | 7.520e+01 | 4 | 4 | -1 |
| 4 | 1398776357 | 1.000e+02 | 1.000e+02 | 7.000e+01 | 4 | 4 | 3  |
| 4 | 1398887847 | 1.000e+02 | 1.000e+02 | 7.000e+01 | 4 | 2 | 3  |
| 4 | 1398892516 | 2.000e+02 | 1.000e+02 | 7.000e+01 | 2 | 2 | 3  |

|   |            |           |           |           |   |   |   |
|---|------------|-----------|-----------|-----------|---|---|---|
| 4 | 1417185554 | 6.000e+00 | 6.000e+00 | 7.000e+01 | 1 | 1 | 3 |
| 4 | 1398888387 | 3.300e+01 | 3.300e+01 | 7.000e+01 | 3 | 3 | 3 |
| 4 | 1398891149 | 2.000e+01 | 2.000e+01 | 7.000e+01 | 3 | 3 | 3 |
| 4 | 1398776407 | 2.000e+02 | 1.500e+02 | 7.000e+01 | 3 | 3 | 3 |
| 4 | 1398891375 | 1.000e+03 | 1.500e+02 | 7.000e+01 | 1 | 2 | 3 |
| 4 | 1398776634 | 5.000e+00 | 6.000e+01 | 7.000e+01 | 2 | 3 | 3 |
| 4 | 1398786088 | 1.000e+03 | 1.000e+03 | 7.000e+01 | 3 | 3 | 3 |
| 4 | 1398892622 | 3.300e+01 | 3.300e+01 | 7.000e+01 | 2 | 4 | 3 |
| 4 | 1398888074 | 5.000e+01 | 5.000e+01 | 7.000e+01 | 3 | 3 | 3 |
| 4 | 1398867272 | 1.500e+01 | 5.000e+01 | 7.000e+01 | 3 | 3 | 3 |
| 4 | 1398862805 | 2.500e+01 | 2.500e+01 | 7.000e+01 | 3 | 3 | 3 |
| 4 | 1398869031 | 6.000e+01 | 6.000e+01 | 7.000e+01 | 4 | 4 | 3 |
| 4 | 1398889535 | 1.000e+02 | 1.000e+02 | 7.000e+01 | 1 | 1 | 3 |
| 4 | 1398888718 | 1.000e+02 | 1.000e+02 | 7.000e+01 | 2 | 2 | 3 |
| 4 | 1398785751 | 5.000e+01 | 5.000e+01 | 7.000e+01 | 3 | 3 | 3 |
| 4 | 1398889130 | 1.000e+01 | 1.000e+02 | 7.000e+01 | 2 | 2 | 3 |
| 4 | 1398891104 | 1.000e+02 | 5.000e+01 | 7.000e+01 | 4 | 4 | 3 |
| 4 | 1398865276 | 3.000e+01 | 3.000e+01 | 7.000e+01 | 3 | 3 | 3 |
| 4 | 1398888893 | 1.000e+02 | 1.000e+02 | 7.000e+01 | 2 | 2 | 3 |
| 4 | 1398891402 | 3.500e+01 | 5.000e+01 | 7.000e+01 | 2 | 3 | 3 |
| 4 | 1398888834 | 5.000e+01 | 5.000e+01 | 7.000e+01 | 0 | 2 | 3 |
| 4 | 1398784937 | 1.000e+02 | 1.000e+02 | 7.000e+01 | 3 | 3 | 3 |
| 4 | 1398888358 | 3.000e+01 | 3.000e+01 | 7.000e+01 | 3 | 3 | 3 |
| 4 | 1398890003 | 3.000e+00 | 5.000e+01 | 7.000e+01 | 2 | 3 | 3 |
| 4 | 1398891430 | 5.000e+03 | 5.000e+03 | 7.000e+01 | 5 | 5 | 3 |
| 4 | 1398776404 | 4.000e+01 | 4.000e+01 | 7.000e+01 | 4 | 4 | 3 |
| 4 | 1398867266 | 6.000e+00 | 4.000e+01 | 7.000e+01 | 3 | 3 | 3 |
| 4 | 1398778952 | 6.000e+01 | 6.000e+01 | 7.000e+01 | 4 | 4 | 3 |
| 4 | 1398865301 | 5.000e+02 | 5.000e+02 | 7.000e+01 | 2 | 2 | 3 |
| 4 | 1398889925 | 8.000e+01 | 8.000e+01 | 7.000e+01 | 3 | 3 | 3 |
| 4 | 1398776517 | 1.000e+01 | 6.000e+01 | 7.000e+01 | 3 | 2 | 3 |
| 4 | 1408795563 | 5.000e+01 | 5.000e+01 | 7.000e+01 | 4 | 4 | 3 |
| 4 | 1408809584 | 5.000e+01 | 5.000e+01 | 7.000e+01 | 3 | 3 | 3 |
| 4 | 1408805301 | 5.000e+01 | 5.000e+01 | 7.000e+01 | 2 | 2 | 3 |
| 4 | 1408805468 | 4.000e+01 | 4.000e+01 | 7.000e+01 | 3 | 3 | 3 |
| 4 | 1408812462 | 5.000e+01 | 5.000e+01 | 7.000e+01 | 3 | 4 | 3 |
| 4 | 1408808932 | 3.000e+02 | 2.000e+02 | 7.000e+01 | 3 | 3 | 3 |
| 4 | 1408803130 | 3.000e+01 | 3.000e+01 | 7.000e+01 | 4 | 4 | 3 |
| 4 | 1408805005 | 5.000e+00 | 5.000e+01 | 7.000e+01 | 1 | 2 | 3 |
| 4 | 1408810956 | 1.000e+02 | 1.000e+02 | 7.000e+01 | 3 | 3 | 3 |
| 4 | 1408815379 | 3.000e+02 | 3.000e+02 | 7.000e+01 | 2 | 2 | 3 |
| 4 | 1408803877 | 5.000e+01 | 5.000e+01 | 7.000e+01 | 3 | 3 | 3 |
| 4 | 1408806920 | 1.000e+02 | 1.000e+02 | 7.000e+01 | 3 | 3 | 3 |
| 4 | 1408807550 | 3.000e+00 | 3.000e+00 | 7.000e+01 | 3 | 3 | 3 |
| 4 | 1408804745 | 2.000e+02 | 2.000e+02 | 7.000e+01 | 3 | 3 | 3 |
| 4 | 1408807503 | 5.000e+00 | 1.000e+01 | 7.000e+01 | 3 | 2 | 3 |
| 4 | 1408807144 | 3.000e+02 | 3.000e+02 | 7.000e+01 | 3 | 3 | 3 |
| 4 | 1408809849 | 2.000e+02 | 2.000e+02 | 7.000e+01 | 3 | 3 | 3 |
| 4 | 1408803676 | 1.000e+02 | 1.000e+02 | 7.000e+01 | 2 | 2 | 3 |
| 4 | 1408817241 | 1.000e+01 | 1.000e+01 | 7.000e+01 | 4 | 4 | 3 |
| 4 | 1408811947 | 2.000e+02 | 2.000e+02 | 7.000e+01 | 1 | 1 | 3 |
| 4 | 1408811461 | 2.000e+01 | 3.000e+01 | 7.000e+01 | 4 | 4 | 3 |
| 4 | 1408814406 | 1.000e+01 | 1.000e+01 | 7.000e+01 | 3 | 3 | 3 |
| 4 | 1408806191 | 5.000e+00 | 5.000e+00 | 7.000e+01 | 1 | 1 | 3 |
| 4 | 1408814584 | 5.000e+02 | 1.500e+02 | 7.000e+01 | 0 | 1 | 3 |
| 4 | 1408819661 | 1.000e+00 | 1.000e+00 | 7.000e+01 | 4 | 4 | 3 |
| 4 | 1408812882 | 5.000e+01 | 5.000e+01 | 7.000e+01 | 4 | 4 | 3 |
| 4 | 1408808711 | 4.000e+01 | 6.000e+01 | 7.000e+01 | 4 | 3 | 3 |
| 4 | 1408801183 | 8.000e+01 | 8.000e+01 | 7.000e+01 | 4 | 4 | 3 |
| 4 | 1408809769 | 1.000e+02 | 1.000e+02 | 7.000e+01 | 2 | 2 | 3 |
| 4 | 1408799162 | 3.000e+01 | 3.000e+01 | 7.000e+01 | 4 | 4 | 3 |
| 4 | 1408805091 | 3.000e+01 | 3.000e+01 | 7.000e+01 | 4 | 4 | 3 |
| 4 | 1408806651 | 2.000e+02 | 1.500e+02 | 7.000e+01 | 3 | 3 | 3 |
| 4 | 1408816332 | 2.000e+01 | 2.000e+01 | 7.000e+01 | 3 | 3 | 3 |
| 4 | 1408809326 | 1.000e+02 | 1.000e+02 | 7.000e+01 | 3 | 3 | 3 |
| 4 | 1408808791 | 2.000e+01 | 2.000e+01 | 7.000e+01 | 4 | 4 | 3 |
| 4 | 1408801643 | 5.000e+01 | 5.000e+01 | 7.000e+01 | 1 | 2 | 3 |
| 4 | 1408807809 | 7.000e+01 | 7.000e+01 | 7.000e+01 | 2 | 2 | 3 |
| 4 | 1408797111 | 1.000e+02 | 1.000e+02 | 7.000e+01 | 3 | 3 | 3 |

|   |            |           |           |           |   |   |    |
|---|------------|-----------|-----------|-----------|---|---|----|
| 4 | 1408808623 | 3.000e+01 | 3.000e+01 | 7.000e+01 | 3 | 3 | 3  |
| 4 | 1408800367 | 3.000e+02 | 1.000e+02 | 7.000e+01 | 2 | 3 | 3  |
| 4 | 1408808143 | 2.000e+01 | 3.000e+01 | 7.000e+01 | 4 | 3 | 3  |
| 4 | 1408802365 | 4.000e+01 | 6.000e+01 | 7.000e+01 | 3 | 3 | 3  |
| 4 | 1408812007 | 1.000e+02 | 1.000e+02 | 7.000e+01 | 3 | 3 | 3  |
| 4 | 1408812647 | 2.700e+01 | 2.700e+01 | 7.000e+01 | 4 | 4 | 3  |
| 4 | 1408805344 | 2.500e+01 | 2.500e+01 | 7.000e+01 | 4 | 4 | 3  |
| 4 | 1408816236 | 3.000e+01 | 5.000e+01 | 7.000e+01 | 2 | 3 | 3  |
| 4 | 1408814110 | 5.000e+01 | 5.500e+01 | 7.000e+01 | 2 | 2 | 3  |
| 4 | 1408802237 | 5.000e+00 | 5.000e+01 | 7.000e+01 | 3 | 3 | 3  |
| 4 | 1408811941 | 4.000e+00 | 4.000e+00 | 7.000e+01 | 3 | 3 | 3  |
| 4 | 1408820913 | 5.000e+01 | 5.000e+01 | 7.000e+01 | 3 | 3 | 3  |
| 4 | 1408812832 | 8.000e+01 | 8.000e+01 | 7.000e+01 | 3 | 4 | 3  |
| 5 | 1398776357 | 3.000e+01 | 3.000e+01 | 2.060e+01 | 3 | 3 | -1 |
| 5 | 1398887847 | 3.000e+01 | 3.000e+01 | 2.060e+01 | 4 | 4 | -1 |
| 5 | 1398892516 | 3.000e+01 | 3.000e+01 | 2.060e+01 | 2 | 3 | -1 |
| 5 | 1417185554 | 1.000e+01 | 1.000e+01 | 2.060e+01 | 3 | 0 | -1 |
| 5 | 1398888387 | 2.500e+01 | 2.500e+01 | 2.060e+01 | 3 | 3 | -1 |
| 5 | 1398891149 | 1.000e+01 | 1.000e+01 | 2.060e+01 | 3 | 3 | -1 |
| 5 | 1398776407 | 2.000e+01 | 2.000e+01 | 2.060e+01 | 4 | 5 | -1 |
| 5 | 1398891375 | 2.500e+01 | 2.500e+01 | 2.060e+01 | 3 | 3 | -1 |
| 5 | 1398776634 | 2.000e+01 | 2.000e+01 | 2.060e+01 | 2 | 2 | -1 |
| 5 | 1398786088 | 4.500e+01 | 4.500e+01 | 2.060e+01 | 4 | 4 | -1 |
| 5 | 1398892622 | 2.000e+01 | 2.000e+01 | 2.060e+01 | 4 | 5 | -1 |
| 5 | 1398888074 | 3.000e+01 | 3.000e+01 | 2.060e+01 | 3 | 3 | -1 |
| 5 | 1398867272 | 3.000e+01 | 3.000e+01 | 2.060e+01 | 3 | 3 | -1 |
| 5 | 1398862805 | 1.500e+01 | 1.500e+01 | 2.060e+01 | 2 | 2 | -1 |
| 5 | 1398869031 | 2.500e+01 | 2.500e+01 | 2.060e+01 | 3 | 3 | -1 |
| 5 | 1398889535 | 2.500e+01 | 2.500e+01 | 2.060e+01 | 1 | 1 | -1 |
| 5 | 1398888718 | 1.200e+01 | 2.400e+01 | 2.060e+01 | 2 | 2 | -1 |
| 5 | 1398785751 | 2.000e+01 | 2.000e+01 | 2.060e+01 | 2 | 2 | -1 |
| 5 | 1398889130 | 2.400e+01 | 2.400e+01 | 2.060e+01 | 2 | 2 | -1 |
| 5 | 1398891104 | 2.500e+01 | 2.500e+01 | 2.060e+01 | 4 | 5 | -1 |
| 5 | 1398865276 | 2.000e+01 | 2.000e+01 | 2.060e+01 | 4 | 4 | -1 |
| 5 | 1398888893 | 1.600e+01 | 1.600e+01 | 2.060e+01 | 5 | 5 | -1 |
| 5 | 1398891402 | 2.100e+01 | 2.100e+01 | 2.060e+01 | 3 | 4 | -1 |
| 5 | 1398888834 | 4.000e+01 | 3.000e+01 | 2.060e+01 | 1 | 2 | -1 |
| 5 | 1398784937 | 3.000e+01 | 3.000e+01 | 2.060e+01 | 0 | 1 | -1 |
| 5 | 1398888358 | 3.000e+01 | 2.500e+01 | 2.060e+01 | 2 | 2 | -1 |
| 5 | 1398890003 | 5.000e+01 | 5.000e+01 | 2.060e+01 | 3 | 3 | -1 |
| 5 | 1398891430 | 2.000e+01 | 2.000e+01 | 2.060e+01 | 4 | 5 | -1 |
| 5 | 1398776404 | 2.000e+01 | 2.000e+01 | 2.060e+01 | 5 | 5 | -1 |
| 5 | 1398867266 | 2.400e+01 | 2.400e+01 | 2.060e+01 | 4 | 4 | -1 |
| 5 | 1398778952 | 1.800e+01 | 1.800e+01 | 2.060e+01 | 4 | 4 | -1 |
| 5 | 1398865301 | 2.500e+01 | 2.500e+01 | 2.060e+01 | 3 | 3 | -1 |
| 5 | 1398889925 | 2.000e+01 | 2.000e+01 | 2.060e+01 | 4 | 4 | -1 |
| 5 | 1398776517 | 3.000e+01 | 3.000e+01 | 2.060e+01 | 3 | 3 | -1 |
| 5 | 1408795563 | 4.000e+01 | 3.000e+01 | 2.060e+01 | 3 | 4 | -1 |
| 5 | 1408809584 | 2.000e+01 | 2.000e+01 | 2.060e+01 | 2 | 3 | -1 |
| 5 | 1408805301 | 3.500e+01 | 3.500e+01 | 2.060e+01 | 2 | 5 | -1 |
| 5 | 1408805468 | 2.500e+01 | 2.500e+01 | 2.060e+01 | 4 | 5 | -1 |
| 5 | 1408812462 | 4.000e+01 | 4.000e+01 | 2.060e+01 | 3 | 3 | -1 |
| 5 | 1408808932 | 2.500e+01 | 2.500e+01 | 2.060e+01 | 3 | 3 | -1 |
| 5 | 1408803130 | 1.200e+01 | 1.200e+01 | 2.060e+01 | 3 | 3 | -1 |
| 5 | 1408805005 | 2.000e+01 | 2.000e+01 | 2.060e+01 | 4 | 4 | -1 |
| 5 | 1408810956 | 1.400e+01 | 1.800e+01 | 2.060e+01 | 4 | 4 | -1 |
| 5 | 1408815379 | 2.000e+01 | 2.000e+01 | 2.060e+01 | 3 | 4 | -1 |
| 5 | 1408803877 | 3.000e+01 | 3.000e+01 | 2.060e+01 | 2 | 2 | -1 |
| 5 | 1408806920 | 2.000e+01 | 2.000e+01 | 2.060e+01 | 2 | 2 | -1 |
| 5 | 1408807550 | 4.000e+01 | 3.000e+01 | 2.060e+01 | 3 | 4 | -1 |
| 5 | 1408804745 | 2.000e+01 | 2.000e+01 | 2.060e+01 | 3 | 3 | -1 |
| 5 | 1408807503 | 3.500e+01 | 3.500e+01 | 2.060e+01 | 2 | 2 | -1 |
| 5 | 1408807144 | 6.500e+01 | 4.500e+01 | 2.060e+01 | 3 | 4 | -1 |
| 5 | 1408809849 | 3.000e+01 | 3.000e+01 | 2.060e+01 | 4 | 4 | -1 |
| 5 | 1408803676 | 2.000e+01 | 2.000e+01 | 2.060e+01 | 3 | 4 | -1 |
| 5 | 1408817241 | 3.000e+01 | 3.000e+01 | 2.060e+01 | 3 | 3 | -1 |
| 5 | 1408811947 | 2.500e+01 | 2.500e+01 | 2.060e+01 | 3 | 3 | -1 |
| 5 | 1408811461 | 2.800e+01 | 2.800e+01 | 2.060e+01 | 3 | 3 | -1 |
| 5 | 1408814406 | 3.000e+01 | 2.100e+01 | 2.060e+01 | 3 | 5 | -1 |

|   |            |           |           |           |   |   |    |
|---|------------|-----------|-----------|-----------|---|---|----|
| 5 | 1408806191 | 3.000e+01 | 3.000e+01 | 2.060e+01 | 4 | 4 | -1 |
| 5 | 1408814584 | 3.000e+01 | 2.500e+01 | 2.060e+01 | 3 | 3 | -1 |
| 5 | 1408819661 | 2.400e+01 | 2.400e+01 | 2.060e+01 | 4 | 4 | -1 |
| 5 | 1408812882 | 2.800e+01 | 2.600e+01 | 2.060e+01 | 3 | 3 | -1 |
| 5 | 1408808711 | 4.400e+01 | 4.400e+01 | 2.060e+01 | 3 | 3 | -1 |
| 5 | 1408801183 | 3.000e+01 | 3.000e+01 | 2.060e+01 | 0 | 4 | -1 |
| 5 | 1408809769 | 4.000e+01 | 4.000e+01 | 2.060e+01 | 3 | 3 | -1 |
| 5 | 1408799162 | 2.000e+01 | 2.000e+01 | 2.060e+01 | 3 | 3 | -1 |
| 5 | 1408805091 | 2.000e+01 | 2.000e+01 | 2.060e+01 | 3 | 3 | -1 |
| 5 | 1408806651 | 2.500e+01 | 2.100e+01 | 2.060e+01 | 3 | 4 | -1 |
| 5 | 1408816332 | 5.000e+01 | 2.000e+01 | 2.060e+01 | 4 | 4 | -1 |
| 5 | 1408809326 | 4.000e+01 | 4.000e+01 | 2.060e+01 | 3 | 3 | -1 |
| 5 | 1408808791 | 3.000e+01 | 2.500e+01 | 2.060e+01 | 4 | 4 | -1 |
| 5 | 1408801643 | 2.000e+01 | 2.000e+01 | 2.060e+01 | 3 | 4 | -1 |
| 5 | 1408807809 | 2.000e+01 | 2.000e+01 | 2.060e+01 | 4 | 5 | -1 |
| 5 | 1408797111 | 3.000e+01 | 3.000e+01 | 2.060e+01 | 3 | 3 | -1 |
| 5 | 1408808623 | 2.600e+01 | 2.600e+01 | 2.060e+01 | 3 | 3 | -1 |
| 5 | 1408800367 | 5.000e+01 | 4.000e+01 | 2.060e+01 | 2 | 3 | -1 |
| 5 | 1408808143 | 1.500e+01 | 2.000e+01 | 2.060e+01 | 3 | 4 | -1 |
| 5 | 1408802365 | 1.500e+01 | 2.000e+01 | 2.060e+01 | 2 | 4 | -1 |
| 5 | 1408812007 | 2.000e+01 | 2.000e+01 | 2.060e+01 | 3 | 5 | -1 |
| 5 | 1408812647 | 2.000e+01 | 2.000e+01 | 2.060e+01 | 3 | 4 | -1 |
| 5 | 1408805344 | 3.500e+01 | 3.500e+01 | 2.060e+01 | 3 | 3 | -1 |
| 5 | 1408816236 | 3.000e+01 | 2.500e+01 | 2.060e+01 | 3 | 3 | -1 |
| 5 | 1408814110 | 2.500e+01 | 2.500e+01 | 2.060e+01 | 3 | 3 | -1 |
| 5 | 1408802237 | 2.000e+01 | 2.000e+01 | 2.060e+01 | 2 | 4 | -1 |
| 5 | 1408811941 | 6.000e+01 | 6.000e+01 | 2.060e+01 | 3 | 3 | -1 |
| 5 | 1408820913 | 1.500e+01 | 1.500e+01 | 2.060e+01 | 4 | 4 | -1 |
| 5 | 1408812832 | 2.500e+01 | 2.000e+01 | 2.060e+01 | 4 | 4 | -1 |
| 6 | 1398776357 | 1.000e+00 | 1.000e+00 | 1.200e+00 | 4 | 4 | 0  |
| 6 | 1398887847 | 3.000e+00 | 3.000e+00 | 1.200e+00 | 0 | 0 | 0  |
| 6 | 1398892516 | 7.500e-01 | 7.500e-01 | 1.200e+00 | 3 | 3 | 0  |
| 6 | 1417185554 | 7.000e-01 | 7.000e-01 | 1.200e+00 | 3 | 3 | 0  |
| 6 | 1398888387 | 5.000e-01 | 1.000e+00 | 1.200e+00 | 0 | 3 | 0  |
| 6 | 1398891149 | 5.000e-01 | 5.000e-01 | 1.200e+00 | 3 | 3 | 0  |
| 6 | 1398776407 | 1.500e+00 | 1.500e+00 | 1.200e+00 | 4 | 5 | 0  |
| 6 | 1398891375 | 1.500e+00 | 1.500e+00 | 1.200e+00 | 4 | 4 | 0  |
| 6 | 1398776634 | 1.000e+00 | 1.000e+00 | 1.200e+00 | 1 | 2 | 0  |
| 6 | 1398786088 | 1.500e+00 | 1.500e+00 | 1.200e+00 | 3 | 3 | 0  |
| 6 | 1398892622 | 1.500e+00 | 1.500e+00 | 1.200e+00 | 4 | 4 | 0  |
| 6 | 1398888074 | 1.000e+00 | 1.000e+00 | 1.200e+00 | 3 | 3 | 0  |
| 6 | 1398867272 | 5.000e-01 | 5.000e-01 | 1.200e+00 | 3 | 3 | 0  |
| 6 | 1398862805 | 7.000e-01 | 7.000e-01 | 1.200e+00 | 3 | 3 | 0  |
| 6 | 1398869031 | 1.200e+00 | 1.200e+00 | 1.200e+00 | 3 | 3 | 0  |
| 6 | 1398889535 | 2.000e+00 | 1.000e+00 | 1.200e+00 | 1 | 1 | 0  |
| 6 | 1398888718 | 3.000e+00 | 2.000e+00 | 1.200e+00 | 0 | 1 | 0  |
| 6 | 1398785751 | 1.500e+00 | 1.500e+00 | 1.200e+00 | 3 | 3 | 0  |
| 6 | 1398889130 | 5.000e+00 | 1.200e+00 | 1.200e+00 | 1 | 4 | 0  |
| 6 | 1398891104 | 2.000e+00 | 1.500e+00 | 1.200e+00 | 4 | 4 | 0  |
| 6 | 1398865276 | 1.000e+00 | 1.000e+00 | 1.200e+00 | 3 | 3 | 0  |
| 6 | 1398888893 | 2.000e+00 | 2.000e+00 | 1.200e+00 | 3 | 3 | 0  |
| 6 | 1398891402 | 1.500e+00 | 1.500e+00 | 1.200e+00 | 5 | 5 | 0  |
| 6 | 1398888834 | 1.500e+00 | 1.300e+00 | 1.200e+00 | 2 | 2 | 0  |
| 6 | 1398784937 | 1.000e+00 | 1.000e+00 | 1.200e+00 | 2 | 2 | 0  |
| 6 | 1398888358 | 1.000e+00 | 1.000e+00 | 1.200e+00 | 3 | 3 | 0  |
| 6 | 1398890003 | 1.500e+00 | 1.500e+00 | 1.200e+00 | 3 | 3 | 0  |
| 6 | 1398891430 | 1.500e+00 | 1.500e+00 | 1.200e+00 | 5 | 5 | 0  |
| 6 | 1398776404 | 1.000e+00 | 1.000e+00 | 1.200e+00 | 4 | 4 | 0  |
| 6 | 1398867266 | 5.000e-01 | 1.000e+00 | 1.200e+00 | 2 | 3 | 0  |
| 6 | 1398778952 | 1.000e+00 | 1.000e+00 | 1.200e+00 | 3 | 3 | 0  |
| 6 | 1398865301 | 8.500e+02 | 8.500e+02 | 1.200e+00 | 2 | 2 | 0  |
| 6 | 1398889925 | 5.000e-01 | 5.000e-01 | 1.200e+00 | 4 | 4 | 0  |
| 6 | 1398776517 | 7.000e-01 | 2.000e+00 | 1.200e+00 | 3 | 3 | 0  |
| 6 | 1408795563 | 6.500e-01 | 6.500e-01 | 1.200e+00 | 4 | 4 | 0  |
| 6 | 1408809584 | 2.000e+00 | 1.600e+00 | 1.200e+00 | 4 | 3 | 0  |
| 6 | 1408805301 | 1.200e+00 | 1.200e+00 | 1.200e+00 | 3 | 5 | 0  |
| 6 | 1408805468 | 1.000e+00 | 1.000e+00 | 1.200e+00 | 4 | 4 | 0  |
| 6 | 1408812462 | 1.000e+00 | 1.000e+00 | 1.200e+00 | 2 | 2 | 0  |
| 6 | 1408808932 | 2.000e+00 | 2.000e+00 | 1.200e+00 | 3 | 3 | 0  |

|   |            |           |           |           |   |   |    |
|---|------------|-----------|-----------|-----------|---|---|----|
| 6 | 1408803130 | 1.250e+00 | 1.250e+00 | 1.200e+00 | 2 | 2 | 0  |
| 6 | 1408805005 | 5.000e-01 | 5.000e-01 | 1.200e+00 | 5 | 5 | 0  |
| 6 | 1408810956 | 7.500e-01 | 7.500e-01 | 1.200e+00 | 3 | 3 | 0  |
| 6 | 1408815379 | 1.000e+00 | 1.000e+00 | 1.200e+00 | 2 | 2 | 0  |
| 6 | 1408803877 | 2.000e+00 | 2.000e+00 | 1.200e+00 | 2 | 1 | 0  |
| 6 | 1408806920 | 5.000e-01 | 5.000e-01 | 1.200e+00 | 5 | 5 | 0  |
| 6 | 1408807550 | 1.000e+00 | 1.000e+00 | 1.200e+00 | 2 | 2 | 0  |
| 6 | 1408804745 | 2.000e+00 | 2.000e+00 | 1.200e+00 | 3 | 3 | 0  |
| 6 | 1408807503 | 3.500e+00 | 3.500e+00 | 1.200e+00 | 3 | 3 | 0  |
| 6 | 1408807144 | 2.000e+00 | 2.000e+00 | 1.200e+00 | 3 | 3 | 0  |
| 6 | 1408809849 | 3.000e+00 | 3.000e+00 | 1.200e+00 | 3 | 3 | 0  |
| 6 | 1408803676 | 5.000e-01 | 5.000e-01 | 1.200e+00 | 5 | 5 | 0  |
| 6 | 1408817241 | 4.000e+00 | 4.000e+00 | 1.200e+00 | 3 | 3 | 0  |
| 6 | 1408811947 | 2.000e+00 | 1.500e+00 | 1.200e+00 | 3 | 3 | 0  |
| 6 | 1408811461 | 2.700e+00 | 2.700e+00 | 1.200e+00 | 3 | 3 | 0  |
| 6 | 1408814406 | 3.000e+00 | 3.000e+00 | 1.200e+00 | 2 | 2 | 0  |
| 6 | 1408806191 | 1.000e+00 | 1.000e+00 | 1.200e+00 | 4 | 4 | 0  |
| 6 | 1408814584 | 1.000e+00 | 1.000e+00 | 1.200e+00 | 2 | 2 | 0  |
| 6 | 1408819661 | 5.000e-01 | 5.000e-01 | 1.200e+00 | 3 | 3 | 0  |
| 6 | 1408812882 | 1.500e+00 | 1.500e+00 | 1.200e+00 | 4 | 4 | 0  |
| 6 | 1408808711 | 3.000e+00 | 3.000e+00 | 1.200e+00 | 3 | 3 | 0  |
| 6 | 1408801183 | 7.500e-01 | 7.500e-01 | 1.200e+00 | 4 | 4 | 0  |
| 6 | 1408809769 | 5.000e-01 | 5.000e-01 | 1.200e+00 | 3 | 3 | 0  |
| 6 | 1408799162 | 8.000e-01 | 8.000e-01 | 1.200e+00 | 3 | 3 | 0  |
| 6 | 1408805091 | 1.000e+00 | 1.000e+00 | 1.200e+00 | 3 | 3 | 0  |
| 6 | 1408806651 | 2.000e+00 | 2.000e+00 | 1.200e+00 | 3 | 3 | 0  |
| 6 | 1408816332 | 1.000e+00 | 1.000e+00 | 1.200e+00 | 2 | 2 | 0  |
| 6 | 1408809326 | 7.500e-01 | 7.500e-01 | 1.200e+00 | 3 | 3 | 0  |
| 6 | 1408808791 | 1.000e+00 | 1.000e+00 | 1.200e+00 | 4 | 4 | 0  |
| 6 | 1408801643 | 1.000e+00 | 1.000e+00 | 1.200e+00 | 2 | 2 | 0  |
| 6 | 1408807809 | 1.500e+00 | 1.500e+00 | 1.200e+00 | 3 | 3 | 0  |
| 6 | 1408797111 | 1.000e+00 | 1.000e+00 | 1.200e+00 | 3 | 3 | 0  |
| 6 | 1408808623 | 1.000e+00 | 1.000e+00 | 1.200e+00 | 3 | 3 | 0  |
| 6 | 1408800367 | 5.000e-01 | 6.000e-01 | 1.200e+00 | 3 | 3 | 0  |
| 6 | 1408808143 | 1.500e+00 | 1.500e+00 | 1.200e+00 | 4 | 4 | 0  |
| 6 | 1408802365 | 2.000e+00 | 2.000e+00 | 1.200e+00 | 1 | 1 | 0  |
| 6 | 1408812007 | 1.000e+00 | 1.000e+00 | 1.200e+00 | 3 | 3 | 0  |
| 6 | 1408812647 | 1.000e+00 | 1.100e+00 | 1.200e+00 | 3 | 4 | 0  |
| 6 | 1408805344 | 1.500e+00 | 1.500e+00 | 1.200e+00 | 3 | 3 | 0  |
| 6 | 1408816236 | 4.500e-01 | 4.500e-01 | 1.200e+00 | 3 | 3 | 0  |
| 6 | 1408814110 | 1.500e+00 | 1.500e+00 | 1.200e+00 | 2 | 2 | 0  |
| 6 | 1408802237 | 4.000e-01 | 4.000e-01 | 1.200e+00 | 3 | 3 | 0  |
| 6 | 1408811941 | 5.000e+00 | 3.000e+00 | 1.200e+00 | 2 | 2 | 0  |
| 6 | 1408820913 | 5.000e-01 | 5.000e-01 | 1.200e+00 | 0 | 0 | 0  |
| 6 | 1408812832 | 2.000e+00 | 2.000e+00 | 1.200e+00 | 4 | 4 | 0  |
| 7 | 1398776357 | 5.000e+00 | 5.000e+00 | 1.250e+01 | 3 | 3 | -1 |
| 7 | 1398887847 | 3.000e+00 | 3.000e+00 | 1.250e+01 | 2 | 2 | -1 |
| 7 | 1398892516 | 8.000e+00 | 1.000e+01 | 1.250e+01 | 3 | 3 | -1 |
| 7 | 1417185554 | 2.000e+02 | 2.000e+02 | 1.250e+01 | 3 | 3 | -1 |
| 7 | 1398888387 | 1.000e-02 | 1.000e-02 | 1.250e+01 | 1 | 1 | -1 |
| 7 | 1398891149 | 2.000e+01 | 2.000e+01 | 1.250e+01 | 3 | 3 | -1 |
| 7 | 1398776407 | 7.000e+00 | 7.000e+00 | 1.250e+01 | 3 | 3 | -1 |
| 7 | 1398891375 | 3.000e+00 | 8.000e+00 | 1.250e+01 | 2 | 2 | -1 |
| 7 | 1398776634 | 1.000e+01 | 1.000e+01 | 1.250e+01 | 0 | 2 | -1 |
| 7 | 1398786088 | 5.000e+00 | 5.000e+00 | 1.250e+01 | 3 | 3 | -1 |
| 7 | 1398892622 | 1.100e+01 | 1.100e+01 | 1.250e+01 | 4 | 5 | -1 |
| 7 | 1398888074 | 5.000e+01 | 5.000e+01 | 1.250e+01 | 3 | 3 | -1 |
| 7 | 1398867272 | 5.000e+00 | 1.000e+01 | 1.250e+01 | 2 | 3 | -1 |
| 7 | 1398862805 | 1.000e+00 | 1.000e+00 | 1.250e+01 | 2 | 2 | -1 |
| 7 | 1398869031 | 2.000e+01 | 2.000e+01 | 1.250e+01 | 3 | 3 | -1 |
| 7 | 1398889535 | 2.000e+01 | 2.000e+01 | 1.250e+01 | 0 | 0 | -1 |
| 7 | 1398888718 | 2.000e+01 | 2.000e+01 | 1.250e+01 | 0 | 2 | -1 |
| 7 | 1398785751 | 5.000e+00 | 7.000e+00 | 1.250e+01 | 4 | 4 | -1 |
| 7 | 1398889130 | 2.000e+00 | 1.200e+01 | 1.250e+01 | 1 | 4 | -1 |
| 7 | 1398891104 | 1.000e+01 | 1.000e+01 | 1.250e+01 | 4 | 4 | -1 |
| 7 | 1398865276 | 0.000e+00 | 1.000e+01 | 1.250e+01 | 3 | 3 | -1 |
| 7 | 1398888893 | 1.750e+02 | 5.000e+01 | 1.250e+01 | 3 | 3 | -1 |
| 7 | 1398891402 | 4.000e+00 | 7.000e+00 | 1.250e+01 | 0 | 3 | -1 |
| 7 | 1398888834 | 5.000e+01 | 1.000e+01 | 1.250e+01 | 1 | 3 | -1 |



|   |            |           |           |           |   |   |    |
|---|------------|-----------|-----------|-----------|---|---|----|
| 7 | 1398784937 | 5.000e+01 | 5.000e+01 | 1.250e+01 | 0 | 0 | -1 |
| 7 | 1398888358 | 5.000e+01 | 1.500e+01 | 1.250e+01 | 3 | 3 | -1 |
| 7 | 1398890003 | 5.000e+01 | 5.000e+01 | 1.250e+01 | 3 | 4 | -1 |
| 7 | 1398891430 | 5.000e+01 | 2.500e+01 | 1.250e+01 | 4 | 4 | -1 |
| 7 | 1398776404 | 2.800e+01 | 1.500e+01 | 1.250e+01 | 2 | 4 | -1 |
| 7 | 1398867266 | 5.000e-01 | 2.000e+01 | 1.250e+01 | 2 | 3 | -1 |
| 7 | 1398778952 | 1.000e+00 | 1.000e+00 | 1.250e+01 | 5 | 5 | -1 |
| 7 | 1398865301 | 1.500e+01 | 1.500e+01 | 1.250e+01 | 2 | 2 | -1 |
| 7 | 1398889925 | 4.000e+00 | 4.000e+00 | 1.250e+01 | 3 | 3 | -1 |
| 7 | 1398776517 | 4.000e+02 | 1.000e+01 | 1.250e+01 | 3 | 3 | -1 |
| 7 | 1408795563 | 6.000e+01 | 2.000e+01 | 1.250e+01 | 2 | 4 | -1 |
| 7 | 1408809584 | 4.000e+00 | 5.000e+00 | 1.250e+01 | 3 | 4 | -1 |
| 7 | 1408805301 | 2.000e+01 | 2.000e+01 | 1.250e+01 | 2 | 2 | -1 |
| 7 | 1408805468 | 2.000e+01 | 1.500e+01 | 1.250e+01 | 3 | 4 | -1 |
| 7 | 1408812462 | 3.000e+00 | 3.000e+00 | 1.250e+01 | 2 | 1 | -1 |
| 7 | 1408808932 | 5.000e+00 | 1.000e+01 | 1.250e+01 | 2 | 2 | -1 |
| 7 | 1408803130 | 2.500e+01 | 2.500e+01 | 1.250e+01 | 1 | 1 | -1 |
| 7 | 1408805005 | 2.900e+00 | 2.900e+00 | 1.250e+01 | 3 | 3 | -1 |
| 7 | 1408810956 | 5.000e+00 | 7.500e+00 | 1.250e+01 | 3 | 3 | -1 |
| 7 | 1408815379 | 2.000e+01 | 2.000e+01 | 1.250e+01 | 2 | 3 | -1 |
| 7 | 1408803877 | 1.000e+01 | 1.000e+01 | 1.250e+01 | 2 | 3 | -1 |
| 7 | 1408806920 | 1.000e+02 | 3.000e+01 | 1.250e+01 | 3 | 3 | -1 |
| 7 | 1408807550 | 5.000e+01 | 3.000e+01 | 1.250e+01 | 3 | 4 | -1 |
| 7 | 1408804745 | 5.000e+01 | 5.000e+01 | 1.250e+01 | 1 | 1 | -1 |
| 7 | 1408807503 | 1.000e+01 | 1.000e+01 | 1.250e+01 | 2 | 2 | -1 |
| 7 | 1408807144 | 4.000e+00 | 8.000e+00 | 1.250e+01 | 3 | 3 | -1 |
| 7 | 1408809849 | 5.000e+01 | 3.000e+01 | 1.250e+01 | 3 | 3 | -1 |
| 7 | 1408803676 | 3.000e+01 | 2.000e+01 | 1.250e+01 | 1 | 1 | -1 |
| 7 | 1408817241 | 5.000e-01 | 1.000e+00 | 1.250e+01 | 2 | 2 | -1 |
| 7 | 1408811947 | 2.000e+01 | 1.000e+01 | 1.250e+01 | 1 | 1 | -1 |
| 7 | 1408811461 | 3.000e+00 | 8.000e+00 | 1.250e+01 | 3 | 3 | -1 |
| 7 | 1408814406 | 5.000e+01 | 1.300e+01 | 1.250e+01 | 2 | 5 | -1 |
| 7 | 1408806191 | 2.500e+01 | 2.500e+01 | 1.250e+01 | 3 | 3 | -1 |
| 7 | 1408814584 | 5.000e+01 | 1.500e+01 | 1.250e+01 | 1 | 3 | -1 |
| 7 | 1408819661 | 1.000e+01 | 1.000e+01 | 1.250e+01 | 3 | 4 | -1 |
| 7 | 1408812882 | 1.300e+02 | 2.000e+01 | 1.250e+01 | 2 | 3 | -1 |
| 7 | 1408808711 | 1.500e+01 | 1.500e+01 | 1.250e+01 | 3 | 3 | -1 |
| 7 | 1408801183 | 3.000e+01 | 3.000e+01 | 1.250e+01 | 4 | 4 | -1 |
| 7 | 1408809769 | 6.110e+00 | 6.110e+00 | 1.250e+01 | 5 | 5 | -1 |
| 7 | 1408799162 | 1.300e+01 | 1.300e+01 | 1.250e+01 | 3 | 3 | -1 |
| 7 | 1408805091 | 2.000e+00 | 2.000e+00 | 1.250e+01 | 3 | 3 | -1 |
| 7 | 1408806651 | 5.000e+01 | 2.000e+01 | 1.250e+01 | 3 | 3 | -1 |
| 7 | 1408816332 | 7.000e+00 | 1.000e+01 | 1.250e+01 | 4 | 4 | -1 |
| 7 | 1408809326 | 1.200e+02 | 1.200e+02 | 1.250e+01 | 3 | 3 | -1 |
| 7 | 1408808791 | 1.000e+01 | 1.000e+01 | 1.250e+01 | 4 | 4 | -1 |
| 7 | 1408801643 | 3.000e+00 | 8.000e+00 | 1.250e+01 | 1 | 1 | -1 |
| 7 | 1408807809 | 8.000e+00 | 8.000e+00 | 1.250e+01 | 4 | 3 | -1 |
| 7 | 1408797111 | 5.000e+01 | 2.000e+01 | 1.250e+01 | 2 | 3 | -1 |
| 7 | 1408808623 | 1.500e+01 | 1.500e+01 | 1.250e+01 | 3 | 2 | -1 |
| 7 | 1408800367 | 3.000e+01 | 2.000e+01 | 1.250e+01 | 2 | 3 | -1 |
| 7 | 1408808143 | 2.000e+01 | 2.000e+01 | 1.250e+01 | 4 | 4 | -1 |
| 7 | 1408802365 | 1.000e+01 | 1.200e+01 | 1.250e+01 | 3 | 4 | -1 |
| 7 | 1408812007 | 5.000e+00 | 5.000e+00 | 1.250e+01 | 3 | 3 | -1 |
| 7 | 1408812647 | 5.800e+01 | 5.800e+01 | 1.250e+01 | 3 | 3 | -1 |
| 7 | 1408805344 | 3.000e+00 | 3.000e+00 | 1.250e+01 | 2 | 2 | -1 |
| 7 | 1408816236 | 5.000e+01 | 1.500e+01 | 1.250e+01 | 2 | 3 | -1 |
| 7 | 1408814110 | 3.000e+01 | 2.000e+01 | 1.250e+01 | 3 | 3 | -1 |
| 7 | 1408802237 | 8.000e+00 | 8.000e+00 | 1.250e+01 | 3 | 3 | -1 |
| 7 | 1408811941 | 5.000e+00 | 1.000e+01 | 1.250e+01 | 3 | 3 | -1 |
| 7 | 1408820913 | 5.000e+01 | 4.000e+01 | 1.250e+01 | 3 | 3 | -1 |
| 7 | 1408812832 | 1.500e+01 | 1.500e+01 | 1.250e+01 | 3 | 3 | -1 |
| 8 | 1398776357 | 1.000e+02 | 1.000e+02 | 8.000e+01 | 1 | 1 | 5  |
| 8 | 1398887847 | 1.000e+02 | 1.000e+02 | 8.000e+01 | 4 | 4 | 5  |
| 8 | 1398892516 | 1.000e+02 | 1.000e+02 | 8.000e+01 | 3 | 3 | 5  |
| 8 | 1417185554 | 3.000e+01 | 3.000e+01 | 8.000e+01 | 5 | 5 | 5  |
| 8 | 1398888387 | 1.500e+01 | 1.500e+01 | 8.000e+01 | 4 | 4 | 5  |
| 8 | 1398891149 | 5.000e+01 | 5.000e+01 | 8.000e+01 | 3 | 3 | 5  |
| 8 | 1398776407 | 1.000e+02 | 1.000e+02 | 8.000e+01 | 3 | 4 | 5  |
| 8 | 1398891375 | 1.000e+02 | 9.000e+01 | 8.000e+01 | 3 | 4 | 5  |

|   |            |           |           |           |   |   |   |
|---|------------|-----------|-----------|-----------|---|---|---|
| 8 | 1398776634 | 5.000e+01 | 8.000e+01 | 8.000e+01 | 1 | 2 | 5 |
| 8 | 1398786088 | 8.000e+01 | 8.000e+01 | 8.000e+01 | 4 | 4 | 5 |
| 8 | 1398892622 | 7.200e+01 | 7.200e+01 | 8.000e+01 | 3 | 4 | 5 |
| 8 | 1398888074 | 3.000e+01 | 4.000e+01 | 8.000e+01 | 2 | 3 | 5 |
| 8 | 1398867272 | 2.000e+01 | 2.000e+01 | 8.000e+01 | 2 | 2 | 5 |
| 8 | 1398862805 | 1.000e+02 | 1.000e+02 | 8.000e+01 | 3 | 3 | 5 |
| 8 | 1398869031 | 8.000e+01 | 8.000e+01 | 8.000e+01 | 2 | 4 | 5 |
| 8 | 1398889535 | 1.000e+02 | 8.000e+01 | 8.000e+01 | 1 | 1 | 5 |
| 8 | 1398888718 | 2.000e+02 | 1.000e+02 | 8.000e+01 | 2 | 3 | 5 |
| 8 | 1398785751 | 4.000e+01 | 5.000e+01 | 8.000e+01 | 1 | 2 | 5 |
| 8 | 1398889130 | 5.000e+01 | 5.000e+01 | 8.000e+01 | 2 | 2 | 5 |
| 8 | 1398891104 | 3.500e+01 | 8.000e+01 | 8.000e+01 | 5 | 5 | 5 |
| 8 | 1398865276 | 3.000e+02 | 7.000e+01 | 8.000e+01 | 2 | 4 | 5 |
| 8 | 1398888893 | 1.000e+02 | 1.000e+02 | 8.000e+01 | 3 | 3 | 5 |
| 8 | 1398891402 | 1.200e+02 | 1.000e+02 | 8.000e+01 | 1 | 3 | 5 |
| 8 | 1398888834 | 3.000e+02 | 8.000e+01 | 8.000e+01 | 1 | 4 | 5 |
| 8 | 1398784937 | 1.300e+01 | 8.100e+01 | 8.000e+01 | 1 | 4 | 5 |
| 8 | 1398888358 | 4.000e+01 | 8.000e+01 | 8.000e+01 | 3 | 3 | 5 |
| 8 | 1398890003 | 2.500e+01 | 8.000e+01 | 8.000e+01 | 1 | 5 | 5 |
| 8 | 1398891430 | 9.000e+01 | 9.000e+01 | 8.000e+01 | 4 | 4 | 5 |
| 8 | 1398776404 | 6.000e+01 | 6.000e+01 | 8.000e+01 | 3 | 4 | 5 |
| 8 | 1398867266 | 3.500e+02 | 1.000e+02 | 8.000e+01 | 3 | 4 | 5 |
| 8 | 1398778952 | 1.200e+01 | 2.000e+01 | 8.000e+01 | 4 | 4 | 5 |
| 8 | 1398865301 | 2.000e+02 | 1.000e+02 | 8.000e+01 | 2 | 3 | 5 |
| 8 | 1398889925 | 1.250e+02 | 1.250e+02 | 8.000e+01 | 3 | 3 | 5 |
| 8 | 1398776517 | 2.500e+01 | 8.000e+01 | 8.000e+01 | 2 | 4 | 5 |
| 8 | 1408795563 | 3.000e+01 | 4.000e+01 | 8.000e+01 | 1 | 3 | 5 |
| 8 | 1408809584 | 4.000e+01 | 4.000e+01 | 8.000e+01 | 4 | 4 | 5 |
| 8 | 1408805301 | 3.300e+01 | 3.300e+01 | 8.000e+01 | 3 | 4 | 5 |
| 8 | 1408805468 | 5.000e+01 | 5.000e+01 | 8.000e+01 | 3 | 3 | 5 |
| 8 | 1408812462 | 5.000e+01 | 8.000e+01 | 8.000e+01 | 3 | 4 | 5 |
| 8 | 1408808932 | 1.000e+02 | 9.000e+01 | 8.000e+01 | 3 | 3 | 5 |
| 8 | 1408803130 | 3.000e+01 | 8.000e+01 | 8.000e+01 | 3 | 4 | 5 |
| 8 | 1408805005 | 5.000e+01 | 8.000e+01 | 8.000e+01 | 3 | 3 | 5 |
| 8 | 1408810956 | 4.000e+01 | 6.000e+01 | 8.000e+01 | 2 | 2 | 5 |
| 8 | 1408815379 | 2.500e+01 | 6.000e+01 | 8.000e+01 | 3 | 3 | 5 |
| 8 | 1408803877 | 5.000e+01 | 5.000e+01 | 8.000e+01 | 2 | 2 | 5 |
| 8 | 1408806920 | 7.000e+01 | 7.000e+01 | 8.000e+01 | 5 | 5 | 5 |
| 8 | 1408807550 | 6.000e+01 | 7.000e+01 | 8.000e+01 | 3 | 3 | 5 |
| 8 | 1408804745 | 4.600e+01 | 4.600e+01 | 8.000e+01 | 3 | 3 | 5 |
| 8 | 1408807503 | 5.000e+01 | 8.000e+01 | 8.000e+01 | 3 | 3 | 5 |
| 8 | 1408807144 | 5.000e+01 | 5.000e+01 | 8.000e+01 | 3 | 3 | 5 |
| 8 | 1408809849 | 4.000e+01 | 8.000e+01 | 8.000e+01 | 3 | 3 | 5 |
| 8 | 1408803676 | 3.000e+01 | 6.000e+01 | 8.000e+01 | 3 | 3 | 5 |
| 8 | 1408817241 | 1.000e+02 | 8.000e+01 | 8.000e+01 | 2 | 3 | 5 |
| 8 | 1408811947 | 6.500e+01 | 6.500e+01 | 8.000e+01 | 3 | 3 | 5 |
| 8 | 1408811461 | 8.000e+01 | 8.000e+01 | 8.000e+01 | 3 | 3 | 5 |
| 8 | 1408814406 | 5.000e+01 | 5.000e+01 | 8.000e+01 | 4 | 4 | 5 |
| 8 | 1408806191 | 8.000e+01 | 8.000e+01 | 8.000e+01 | 2 | 4 | 5 |
| 8 | 1408814584 | 1.000e+02 | 8.000e+01 | 8.000e+01 | 0 | 3 | 5 |
| 8 | 1408819661 | 8.000e+01 | 8.000e+01 | 8.000e+01 | 2 | 3 | 5 |
| 8 | 1408812882 | 1.300e+02 | 8.000e+01 | 8.000e+01 | 3 | 3 | 5 |
| 8 | 1408808711 | 5.000e+01 | 6.500e+01 | 8.000e+01 | 3 | 2 | 5 |
| 8 | 1408801183 | 5.000e+01 | 8.000e+01 | 8.000e+01 | 3 | 4 | 5 |
| 8 | 1408809769 | 5.000e+01 | 5.000e+01 | 8.000e+01 | 4 | 4 | 5 |
| 8 | 1408799162 | 4.000e+01 | 4.000e+01 | 8.000e+01 | 4 | 4 | 5 |
| 8 | 1408805091 | 2.500e+01 | 2.500e+01 | 8.000e+01 | 4 | 4 | 5 |
| 8 | 1408806651 | 4.000e+01 | 6.000e+01 | 8.000e+01 | 3 | 4 | 5 |
| 8 | 1408816332 | 8.500e+01 | 8.000e+01 | 8.000e+01 | 1 | 3 | 5 |
| 8 | 1408809326 | 8.000e+01 | 8.000e+01 | 8.000e+01 | 4 | 4 | 5 |
| 8 | 1408808791 | 5.000e+01 | 5.000e+01 | 8.000e+01 | 4 | 4 | 5 |
| 8 | 1408801643 | 8.000e+01 | 8.000e+01 | 8.000e+01 | 3 | 4 | 5 |
| 8 | 1408807809 | 7.000e+01 | 8.000e+01 | 8.000e+01 | 4 | 4 | 5 |
| 8 | 1408797111 | 2.000e+02 | 8.000e+01 | 8.000e+01 | 2 | 3 | 5 |
| 8 | 1408808623 | 5.500e+01 | 7.000e+01 | 8.000e+01 | 2 | 3 | 5 |
| 8 | 1408800367 | 9.000e+01 | 9.000e+01 | 8.000e+01 | 3 | 4 | 5 |
| 8 | 1408808143 | 1.000e+02 | 1.000e+02 | 8.000e+01 | 2 | 3 | 5 |
| 8 | 1408802365 | 1.500e+02 | 9.000e+01 | 8.000e+01 | 3 | 3 | 5 |
| 8 | 1408812007 | 1.000e+02 | 8.000e+01 | 8.000e+01 | 3 | 5 | 5 |

|   |            |           |           |           |   |   |    |
|---|------------|-----------|-----------|-----------|---|---|----|
| 8 | 1408812647 | 2.000e+02 | 2.000e+02 | 8.000e+01 | 3 | 3 | 5  |
| 8 | 1408805344 | 3.000e+01 | 3.000e+01 | 8.000e+01 | 3 | 3 | 5  |
| 8 | 1408816236 | 6.000e+01 | 7.800e+01 | 8.000e+01 | 3 | 4 | 5  |
| 8 | 1408814110 | 4.000e+01 | 7.500e+01 | 8.000e+01 | 3 | 4 | 5  |
| 8 | 1408802237 | 3.500e+01 | 3.500e+01 | 8.000e+01 | 4 | 4 | 5  |
| 8 | 1408811941 | 3.500e+01 | 5.000e+01 | 8.000e+01 | 3 | 3 | 5  |
| 8 | 1408820913 | 7.000e+01 | 7.000e+01 | 8.000e+01 | 2 | 3 | 5  |
| 8 | 1408812832 | 7.000e+01 | 7.000e+01 | 8.000e+01 | 4 | 4 | 5  |
| 9 | 1398776357 | 1.000e+02 | 1.000e+02 | 1.380e+03 | 3 | 3 | -1 |
| 9 | 1398887847 | 2.000e+02 | 2.000e+02 | 1.380e+03 | 2 | 2 | -1 |
| 9 | 1398892516 | 1.200e+03 | 1.200e+03 | 1.380e+03 | 3 | 3 | -1 |
| 9 | 1417185554 | 3.000e+02 | 3.000e+02 | 1.380e+03 | 4 | 1 | -1 |
| 9 | 1398888387 | 5.000e+03 | 1.500e+03 | 1.380e+03 | 4 | 4 | -1 |
| 9 | 1398891149 | 3.000e+02 | 5.000e+02 | 1.380e+03 | 1 | 2 | -1 |
| 9 | 1398776407 | 5.000e+02 | 1.000e+03 | 1.380e+03 | 3 | 3 | -1 |
| 9 | 1398891375 | 1.400e+02 | 1.400e+02 | 1.380e+03 | 1 | 1 | -1 |
| 9 | 1398776634 | 6.000e+02 | 1.380e+03 | 1.380e+03 | 2 | 2 | -1 |
| 9 | 1398786088 | 2.000e+02 | 6.000e+02 | 1.380e+03 | 4 | 3 | -1 |
| 9 | 1398892622 | 3.600e+03 | 2.300e+03 | 1.380e+03 | 4 | 2 | -1 |
| 9 | 1398888074 | 1.000e+03 | 1.000e+03 | 1.380e+03 | 2 | 2 | -1 |
| 9 | 1398867272 | 1.800e+02 | 3.000e+02 | 1.380e+03 | 1 | 3 | -1 |
| 9 | 1398862805 | 1.200e+02 | 1.000e+03 | 1.380e+03 | 1 | 3 | -1 |
| 9 | 1398869031 | 1.200e+03 | 1.300e+03 | 1.380e+03 | 4 | 4 | -1 |
| 9 | 1398889535 | 1.600e+02 | 1.360e+03 | 1.380e+03 | 1 | 1 | -1 |
| 9 | 1398888718 | 3.000e+02 | 1.300e+03 | 1.380e+03 | 2 | 2 | -1 |
| 9 | 1398785751 | 8.000e+02 | 1.000e+03 | 1.380e+03 | 3 | 3 | -1 |
| 9 | 1398889130 | 1.000e+03 | 1.000e+03 | 1.380e+03 | 1 | 1 | -1 |
| 9 | 1398891104 | 3.000e+03 | 1.800e+03 | 1.380e+03 | 3 | 3 | -1 |
| 9 | 1398865276 | 2.000e+02 | 2.000e+02 | 1.380e+03 | 3 | 3 | -1 |
| 9 | 1398888893 | 1.200e+02 | 2.000e+03 | 1.380e+03 | 4 | 4 | -1 |
| 9 | 1398891402 | 7.500e+02 | 1.200e+03 | 1.380e+03 | 0 | 3 | -1 |
| 9 | 1398888834 | 2.000e+02 | 1.000e+03 | 1.380e+03 | 1 | 1 | -1 |
| 9 | 1398784937 | 1.500e+03 | 1.400e+03 | 1.380e+03 | 3 | 3 | -1 |
| 9 | 1398888358 | 1.200e+03 | 1.380e+03 | 1.380e+03 | 2 | 2 | -1 |
| 9 | 1398890003 | 1.200e+03 | 1.200e+03 | 1.380e+03 | 4 | 5 | -1 |
| 9 | 1398891430 | 2.750e+02 | 5.000e+02 | 1.380e+03 | 4 | 4 | -1 |
| 9 | 1398776404 | 9.000e+02 | 9.000e+02 | 1.380e+03 | 2 | 3 | -1 |
| 9 | 1398867266 | 3.000e+02 | 1.300e+03 | 1.380e+03 | 1 | 3 | -1 |
| 9 | 1398778952 | 4.500e+01 | 1.300e+03 | 1.380e+03 | 4 | 4 | -1 |
| 9 | 1398865301 | 1.500e+03 | 1.500e+03 | 1.380e+03 | 1 | 1 | -1 |
| 9 | 1398889925 | 2.500e+02 | 6.500e+02 | 1.380e+03 | 2 | 2 | -1 |
| 9 | 1398776517 | 1.500e+02 | 1.000e+03 | 1.380e+03 | 3 | 3 | -1 |
| 9 | 1408795563 | 9.750e+02 | 1.300e+03 | 1.380e+03 | 4 | 4 | -1 |
| 9 | 1408809584 | 1.750e+03 | 1.750e+03 | 1.380e+03 | 5 | 5 | -1 |
| 9 | 1408805301 | 1.450e+03 | 1.450e+03 | 1.380e+03 | 4 | 5 | -1 |
| 9 | 1408805468 | 7.470e+02 | 7.470e+02 | 1.380e+03 | 5 | 1 | -1 |
| 9 | 1408812462 | 1.600e+03 | 1.600e+03 | 1.380e+03 | 3 | 3 | -1 |
| 9 | 1408808932 | 3.000e+02 | 1.000e+03 | 1.380e+03 | 3 | 3 | -1 |
| 9 | 1408803130 | 7.000e+02 | 1.380e+03 | 1.380e+03 | 2 | 2 | -1 |
| 9 | 1408805005 | 5.000e+02 | 1.200e+03 | 1.380e+03 | 1 | 3 | -1 |
| 9 | 1408810956 | 1.350e+03 | 1.350e+03 | 1.380e+03 | 5 | 5 | -1 |
| 9 | 1408815379 | 9.000e+02 | 1.200e+03 | 1.380e+03 | 3 | 3 | -1 |
| 9 | 1408803877 | 2.000e+02 | 1.300e+03 | 1.380e+03 | 2 | 3 | -1 |
| 9 | 1408806920 | 1.500e+03 | 1.400e+03 | 1.380e+03 | 0 | 0 | -1 |
| 9 | 1408807550 | 1.500e+03 | 1.400e+03 | 1.380e+03 | 3 | 4 | -1 |
| 9 | 1408804745 | 1.200e+03 | 1.300e+03 | 1.380e+03 | 3 | 3 | -1 |
| 9 | 1408807503 | 8.000e+02 | 8.000e+02 | 1.380e+03 | 2 | 2 | -1 |
| 9 | 1408807144 | 1.545e+03 | 1.545e+03 | 1.380e+03 | 5 | 5 | -1 |
| 9 | 1408809849 | 1.500e+03 | 1.500e+03 | 1.380e+03 | 3 | 3 | -1 |
| 9 | 1408803676 | 3.500e+02 | 1.200e+03 | 1.380e+03 | 3 | 3 | -1 |
| 9 | 1408817241 | 3.500e+03 | 2.500e+03 | 1.380e+03 | 3 | 3 | -1 |
| 9 | 1408811947 | 1.250e+03 | 1.400e+03 | 1.380e+03 | 3 | 3 | -1 |
| 9 | 1408811461 | 9.000e+02 | 1.100e+03 | 1.380e+03 | 3 | 3 | -1 |
| 9 | 1408814406 | 1.400e+03 | 1.380e+03 | 1.380e+03 | 4 | 5 | -1 |
| 9 | 1408806191 | 7.000e+02 | 1.000e+03 | 1.380e+03 | 1 | 3 | -1 |
| 9 | 1408814584 | 7.000e+02 | 1.380e+03 | 1.380e+03 | 2 | 3 | -1 |
| 9 | 1408819661 | 1.000e+03 | 1.000e+03 | 1.380e+03 | 3 | 3 | -1 |
| 9 | 1408812882 | 5.000e+03 | 3.000e+03 | 1.380e+03 | 2 | 3 | -1 |
| 9 | 1408808711 | 7.500e+02 | 7.500e+02 | 1.380e+03 | 4 | 4 | -1 |

|    |            |           |           |           |   |   |    |
|----|------------|-----------|-----------|-----------|---|---|----|
| 9  | 1408801183 | 1.400e+02 | 1.300e+03 | 1.380e+03 | 3 | 3 | -1 |
| 9  | 1408809769 | 5.000e+02 | 1.300e+03 | 1.380e+03 | 3 | 3 | -1 |
| 9  | 1408799162 | 8.000e+02 | 8.000e+02 | 1.380e+03 | 3 | 3 | -1 |
| 9  | 1408805091 | 1.000e+03 | 1.000e+03 | 1.380e+03 | 2 | 2 | -1 |
| 9  | 1408806651 | 1.400e+03 | 1.400e+03 | 1.380e+03 | 3 | 4 | -1 |
| 9  | 1408816332 | 1.000e+03 | 1.300e+03 | 1.380e+03 | 3 | 3 | -1 |
| 9  | 1408809326 | 1.100e+03 | 1.200e+03 | 1.380e+03 | 3 | 3 | -1 |
| 9  | 1408808791 | 2.000e+02 | 2.000e+02 | 1.380e+03 | 3 | 2 | -1 |
| 9  | 1408801643 | 1.000e+03 | 1.000e+03 | 1.380e+03 | 2 | 2 | -1 |
| 9  | 1408807809 | 1.700e+03 | 1.380e+03 | 1.380e+03 | 4 | 3 | -1 |
| 9  | 1408797111 | 3.000e+03 | 1.500e+03 | 1.380e+03 | 3 | 3 | -1 |
| 9  | 1408808623 | 5.000e+02 | 8.000e+02 | 1.380e+03 | 3 | 2 | -1 |
| 9  | 1408800367 | 1.000e+03 | 1.200e+03 | 1.380e+03 | 2 | 3 | -1 |
| 9  | 1408808143 | 1.300e+03 | 1.300e+03 | 1.380e+03 | 3 | 4 | -1 |
| 9  | 1408802365 | 1.500e+03 | 1.400e+03 | 1.380e+03 | 3 | 3 | -1 |
| 9  | 1408812007 | 1.800e+03 | 1.800e+03 | 1.380e+03 | 3 | 3 | -1 |
| 9  | 1408812647 | 2.000e+02 | 1.000e+03 | 1.380e+03 | 2 | 4 | -1 |
| 9  | 1408805344 | 1.530e+03 | 1.530e+03 | 1.380e+03 | 4 | 4 | -1 |
| 9  | 1408816236 | 1.200e+03 | 1.380e+03 | 1.380e+03 | 2 | 3 | -1 |
| 9  | 1408814110 | 2.000e+03 | 1.500e+03 | 1.380e+03 | 2 | 3 | -1 |
| 9  | 1408802237 | 1.200e+03 | 1.300e+03 | 1.380e+03 | 3 | 4 | -1 |
| 9  | 1408811941 | 1.500e+03 | 1.500e+03 | 1.380e+03 | 3 | 3 | -1 |
| 9  | 1408820913 | 1.500e+03 | 1.300e+03 | 1.380e+03 | 2 | 2 | -1 |
| 9  | 1408812832 | 9.900e+02 | 1.400e+03 | 1.380e+03 | 4 | 4 | -1 |
| 10 | 1398776357 | 1.000e+00 | 2.000e+02 | 5.000e+02 | 2 | 2 | 4  |
| 10 | 1398887847 | 2.500e+01 | 2.500e+01 | 5.000e+02 | 3 | 3 | 4  |
| 10 | 1398892516 | 3.000e+01 | 4.000e+01 | 5.000e+02 | 3 | 4 | 4  |
| 10 | 1417185554 | 1.000e+01 | 1.000e+01 | 5.000e+02 | 0 | 0 | 4  |
| 10 | 1398888387 | 1.000e+01 | 1.000e+01 | 5.000e+02 | 4 | 4 | 4  |
| 10 | 1398891149 | 1.000e+02 | 1.000e+02 | 5.000e+02 | 3 | 3 | 4  |
| 10 | 1398776407 | 1.200e+02 | 3.000e+02 | 5.000e+02 | 4 | 4 | 4  |
| 10 | 1398891375 | 1.000e+02 | 2.000e+02 | 5.000e+02 | 2 | 2 | 4  |
| 10 | 1398776634 | 8.000e+01 | 8.000e+01 | 5.000e+02 | 3 | 4 | 4  |
| 10 | 1398786088 | 1.500e+01 | 1.500e+01 | 5.000e+02 | 3 | 3 | 4  |
| 10 | 1398892622 | 1.500e+01 | 5.000e+01 | 5.000e+02 | 3 | 2 | 4  |
| 10 | 1398888074 | 1.500e+01 | 3.000e+02 | 5.000e+02 | 3 | 3 | 4  |
| 10 | 1398867272 | 1.500e+01 | 5.000e+01 | 5.000e+02 | 3 | 2 | 4  |
| 10 | 1398862805 | 1.500e+01 | 1.000e+02 | 5.000e+02 | 3 | 3 | 4  |
| 10 | 1398869031 | 5.000e+01 | 6.000e+01 | 5.000e+02 | 3 | 4 | 4  |
| 10 | 1398889535 | 3.000e+01 | 6.000e+01 | 5.000e+02 | 2 | 3 | 4  |
| 10 | 1398888718 | 5.000e+00 | 5.000e+00 | 5.000e+02 | 3 | 3 | 4  |
| 10 | 1398785751 | 5.000e+01 | 5.000e+01 | 5.000e+02 | 3 | 4 | 4  |
| 10 | 1398889130 | 5.000e+00 | 5.000e+00 | 5.000e+02 | 2 | 2 | 4  |
| 10 | 1398891104 | 5.000e+01 | 3.000e+02 | 5.000e+02 | 4 | 4 | 4  |
| 10 | 1398865276 | 2.000e+01 | 5.000e+02 | 5.000e+02 | 3 | 3 | 4  |
| 10 | 1398888893 | 3.000e+01 | 1.000e+02 | 5.000e+02 | 3 | 3 | 4  |
| 10 | 1398891402 | 9.000e+01 | 9.000e+01 | 5.000e+02 | 4 | 4 | 4  |
| 10 | 1398888834 | 1.000e+02 | 3.000e+02 | 5.000e+02 | 1 | 2 | 4  |
| 10 | 1398784937 | 1.000e+02 | 5.000e+02 | 5.000e+02 | 1 | 1 | 4  |
| 10 | 1398888358 | 1.400e+01 | 1.400e+01 | 5.000e+02 | 3 | 3 | 4  |
| 10 | 1398890003 | 1.000e+01 | 2.000e+02 | 5.000e+02 | 3 | 4 | 4  |
| 10 | 1398891430 | 2.500e+02 | 2.500e+02 | 5.000e+02 | 4 | 4 | 4  |
| 10 | 1398776404 | 4.000e+01 | 9.000e+01 | 5.000e+02 | 3 | 3 | 4  |
| 10 | 1398867266 | 2.000e+01 | 2.000e+01 | 5.000e+02 | 3 | 3 | 4  |
| 10 | 1398778952 | 5.000e+00 | 5.000e+00 | 5.000e+02 | 4 | 4 | 4  |
| 10 | 1398865301 | 7.500e+02 | 6.000e+02 | 5.000e+02 | 3 | 3 | 4  |
| 10 | 1398889925 | 5.000e+01 | 5.000e+01 | 5.000e+02 | 3 | 3 | 4  |
| 10 | 1398776517 | 5.000e+01 | 3.000e+02 | 5.000e+02 | 3 | 3 | 4  |
| 10 | 1408795563 | 9.000e+01 | 2.500e+02 | 5.000e+02 | 4 | 4 | 4  |
| 10 | 1408809584 | 3.000e+01 | 3.000e+01 | 5.000e+02 | 3 | 3 | 4  |
| 10 | 1408805301 | 6.000e+01 | 6.000e+01 | 5.000e+02 | 4 | 4 | 4  |
| 10 | 1408805468 | 3.000e+01 | 5.000e+01 | 5.000e+02 | 4 | 4 | 4  |
| 10 | 1408812462 | 2.000e+02 | 2.000e+02 | 5.000e+02 | 2 | 2 | 4  |
| 10 | 1408808932 | 4.000e+00 | 1.000e+01 | 5.000e+02 | 3 | 3 | 4  |
| 10 | 1408803130 | 1.200e+02 | 4.000e+02 | 5.000e+02 | 2 | 2 | 4  |
| 10 | 1408805005 | 1.900e+02 | 1.900e+02 | 5.000e+02 | 4 | 4 | 4  |
| 10 | 1408810956 | 5.000e+02 | 5.000e+02 | 5.000e+02 | 2 | 3 | 4  |
| 10 | 1408815379 | 2.000e+01 | 1.000e+02 | 5.000e+02 | 2 | 3 | 4  |
| 10 | 1408803877 | 2.000e+01 | 2.000e+02 | 5.000e+02 | 2 | 3 | 4  |

|    |            |           |           |           |   |   |    |
|----|------------|-----------|-----------|-----------|---|---|----|
| 10 | 1408806920 | 2.000e+01 | 5.000e+02 | 5.000e+02 | 3 | 3 | 4  |
| 10 | 1408807550 | 1.500e+01 | 1.500e+01 | 5.000e+02 | 3 | 3 | 4  |
| 10 | 1408804745 | 5.000e+01 | 5.000e+01 | 5.000e+02 | 3 | 3 | 4  |
| 10 | 1408807503 | 5.000e+02 | 5.000e+02 | 5.000e+02 | 3 | 3 | 4  |
| 10 | 1408807144 | 1.000e+02 | 3.000e+02 | 5.000e+02 | 2 | 2 | 4  |
| 10 | 1408809849 | 1.000e+03 | 1.000e+03 | 5.000e+02 | 4 | 4 | 4  |
| 10 | 1408803676 | 2.000e+01 | 2.500e+01 | 5.000e+02 | 0 | 2 | 4  |
| 10 | 1408817241 | 1.000e+02 | 3.000e+02 | 5.000e+02 | 3 | 3 | 4  |
| 10 | 1408811947 | 1.000e+01 | 5.000e+02 | 5.000e+02 | 2 | 2 | 4  |
| 10 | 1408811461 | 3.000e+02 | 4.000e+02 | 5.000e+02 | 3 | 3 | 4  |
| 10 | 1408814406 | 5.000e+01 | 5.000e+01 | 5.000e+02 | 3 | 3 | 4  |
| 10 | 1408806191 | 1.000e+01 | 1.000e+02 | 5.000e+02 | 3 | 3 | 4  |
| 10 | 1408814584 | 2.000e+01 | 2.000e+02 | 5.000e+02 | 2 | 2 | 4  |
| 10 | 1408819661 | 1.500e+01 | 1.500e+01 | 5.000e+02 | 3 | 3 | 4  |
| 10 | 1408812882 | 1.000e+02 | 2.000e+02 | 5.000e+02 | 2 | 3 | 4  |
| 10 | 1408808711 | 8.000e+01 | 8.000e+01 | 5.000e+02 | 4 | 4 | 4  |
| 10 | 1408801183 | 1.500e+01 | 1.500e+01 | 5.000e+02 | 5 | 4 | 4  |
| 10 | 1408809769 | 3.000e+01 | 3.000e+02 | 5.000e+02 | 3 | 3 | 4  |
| 10 | 1408799162 | 2.500e+01 | 2.500e+01 | 5.000e+02 | 4 | 4 | 4  |
| 10 | 1408805091 | 3.000e+00 | 3.000e+00 | 5.000e+02 | 3 | 3 | 4  |
| 10 | 1408806651 | 3.000e+01 | 3.000e+01 | 5.000e+02 | 2 | 2 | 4  |
| 10 | 1408816332 | 3.000e+02 | 3.000e+02 | 5.000e+02 | 3 | 3 | 4  |
| 10 | 1408809326 | 8.000e+01 | 8.000e+01 | 5.000e+02 | 3 | 3 | 4  |
| 10 | 1408808791 | 1.000e+01 | 5.000e+01 | 5.000e+02 | 4 | 3 | 4  |
| 10 | 1408801643 | 1.000e+02 | 1.000e+02 | 5.000e+02 | 1 | 1 | 4  |
| 10 | 1408807809 | 5.000e+01 | 2.000e+02 | 5.000e+02 | 3 | 3 | 4  |
| 10 | 1408797111 | 5.000e+01 | 2.000e+02 | 5.000e+02 | 3 | 3 | 4  |
| 10 | 1408808623 | 1.200e+02 | 1.200e+02 | 5.000e+02 | 3 | 3 | 4  |
| 10 | 1408800367 | 5.000e+01 | 1.500e+02 | 5.000e+02 | 2 | 3 | 4  |
| 10 | 1408808143 | 2.000e+01 | 5.000e+01 | 5.000e+02 | 3 | 4 | 4  |
| 10 | 1408802365 | 3.000e+02 | 4.000e+02 | 5.000e+02 | 1 | 4 | 4  |
| 10 | 1408812007 | 2.500e+01 | 2.500e+01 | 5.000e+02 | 3 | 3 | 4  |
| 10 | 1408812647 | 1.500e+01 | 1.500e+01 | 5.000e+02 | 4 | 4 | 4  |
| 10 | 1408805344 | 2.000e+01 | 2.000e+01 | 5.000e+02 | 4 | 4 | 4  |
| 10 | 1408816236 | 1.000e+01 | 1.000e+02 | 5.000e+02 | 2 | 3 | 4  |
| 10 | 1408814110 | 1.000e+02 | 2.000e+02 | 5.000e+02 | 3 | 3 | 4  |
| 10 | 1408802237 | 1.000e+02 | 2.000e+02 | 5.000e+02 | 2 | 2 | 4  |
| 10 | 1408811941 | 4.000e+01 | 4.000e+01 | 5.000e+02 | 3 | 3 | 4  |
| 10 | 1408820913 | 5.500e+01 | 5.500e+01 | 5.000e+02 | 3 | 3 | 4  |
| 10 | 1408812832 | 8.000e+01 | 8.000e+01 | 5.000e+02 | 4 | 5 | 4  |
| 11 | 1398776357 | 1.000e+00 | 1.000e+03 | 1.120e+03 | 0 | 0 | -1 |
| 11 | 1398887847 | 1.000e+02 | 1.000e+03 | 1.120e+03 | 2 | 2 | -1 |
| 11 | 1398892516 | 8.000e+02 | 1.000e+03 | 1.120e+03 | 3 | 3 | -1 |
| 11 | 1417185554 | 7.500e+02 | 7.500e+02 | 1.120e+03 | 4 | 4 | -1 |
| 11 | 1398888387 | 5.000e+01 | 5.000e+02 | 1.120e+03 | 2 | 2 | -1 |
| 11 | 1398891149 | 2.000e+02 | 2.000e+02 | 1.120e+03 | 3 | 3 | -1 |
| 11 | 1398776407 | 9.000e+01 | 1.000e+03 | 1.120e+03 | 2 | 2 | -1 |
| 11 | 1398891375 | 1.000e+03 | 1.120e+03 | 1.120e+03 | 2 | 3 | -1 |
| 11 | 1398776634 | 6.000e+01 | 1.000e+02 | 1.120e+03 | 1 | 1 | -1 |
| 11 | 1398786088 | 1.500e+02 | 1.500e+02 | 1.120e+03 | 4 | 4 | -1 |
| 11 | 1398892622 | 4.000e+02 | 4.000e+02 | 1.120e+03 | 2 | 2 | -1 |
| 11 | 1398888074 | 3.000e+02 | 2.000e+02 | 1.120e+03 | 0 | 0 | -1 |
| 11 | 1398867272 | 1.500e+02 | 2.000e+02 | 1.120e+03 | 3 | 4 | -1 |
| 11 | 1398862805 | 1.000e+01 | 1.000e+03 | 1.120e+03 | 0 | 3 | -1 |
| 11 | 1398869031 | 3.500e+02 | 6.500e+02 | 1.120e+03 | 2 | 3 | -1 |
| 11 | 1398889535 | 2.000e+02 | 1.200e+03 | 1.120e+03 | 0 | 0 | -1 |
| 11 | 1398888718 | 1.000e+00 | 1.200e+02 | 1.120e+03 | 1 | 1 | -1 |
| 11 | 1398785751 | 7.000e+02 | 9.000e+02 | 1.120e+03 | 3 | 3 | -1 |
| 11 | 1398889130 | 1.000e+02 | 1.000e+02 | 1.120e+03 | 2 | 2 | -1 |
| 11 | 1398891104 | 1.000e+03 | 1.300e+03 | 1.120e+03 | 2 | 4 | -1 |
| 11 | 1398865276 | 5.000e+01 | 1.000e+03 | 1.120e+03 | 0 | 0 | -1 |
| 11 | 1398888893 | 1.500e+03 | 1.500e+03 | 1.120e+03 | 3 | 3 | -1 |
| 11 | 1398891402 | 6.800e+02 | 1.000e+03 | 1.120e+03 | 1 | 3 | -1 |
| 11 | 1398888834 | 5.000e+02 | 1.000e+03 | 1.120e+03 | 0 | 1 | -1 |
| 11 | 1398784937 | 5.000e+02 | 1.000e+03 | 1.120e+03 | 0 | 0 | -1 |
| 11 | 1398888358 | 1.200e+03 | 1.200e+03 | 1.120e+03 | 3 | 3 | -1 |
| 11 | 1398890003 | 2.000e+02 | 1.000e+03 | 1.120e+03 | 0 | 4 | -1 |
| 11 | 1398891430 | 3.500e+02 | 5.000e+02 | 1.120e+03 | 3 | 3 | -1 |
| 11 | 1398776404 | 7.500e+02 | 7.500e+02 | 1.120e+03 | 3 | 4 | -1 |

|    |            |           |           |           |   |   |    |
|----|------------|-----------|-----------|-----------|---|---|----|
| 11 | 1398867266 | 3.000e+02 | 1.000e+03 | 1.120e+03 | 1 | 3 | -1 |
| 11 | 1398778952 | 1.500e+02 | 1.500e+03 | 1.120e+03 | 3 | 3 | -1 |
| 11 | 1398865301 | 3.500e+02 | 5.000e+02 | 1.120e+03 | 2 | 2 | -1 |
| 11 | 1398889925 | 5.000e+02 | 5.000e+02 | 1.120e+03 | 3 | 3 | -1 |
| 11 | 1398776517 | 2.000e+01 | 1.200e+03 | 1.120e+03 | 0 | 3 | -1 |
| 11 | 1408795563 | 1.200e+03 | 1.200e+03 | 1.120e+03 | 4 | 5 | -1 |
| 11 | 1408809584 | 4.000e+02 | 4.000e+02 | 1.120e+03 | 4 | 4 | -1 |
| 11 | 1408805301 | 3.000e+02 | 3.000e+02 | 1.120e+03 | 4 | 4 | -1 |
| 11 | 1408805468 | 8.000e+02 | 1.100e+03 | 1.120e+03 | 4 | 5 | -1 |
| 11 | 1408812462 | 3.000e+02 | 1.000e+03 | 1.120e+03 | 1 | 2 | -1 |
| 11 | 1408808932 | 5.000e+02 | 1.000e+03 | 1.120e+03 | 0 | 3 | -1 |
| 11 | 1408803130 | 1.300e+02 | 1.300e+02 | 1.120e+03 | 3 | 3 | -1 |
| 11 | 1408805005 | 5.000e+01 | 5.000e+02 | 1.120e+03 | 0 | 1 | -1 |
| 11 | 1408810956 | 4.500e+02 | 4.500e+02 | 1.120e+03 | 4 | 3 | -1 |
| 11 | 1408815379 | 3.000e+02 | 1.000e+03 | 1.120e+03 | 3 | 3 | -1 |
| 11 | 1408803877 | 1.200e+02 | 1.100e+03 | 1.120e+03 | 2 | 2 | -1 |
| 11 | 1408806920 | 1.500e+02 | 1.000e+03 | 1.120e+03 | 0 | 0 | -1 |
| 11 | 1408807550 | 3.000e+02 | 1.000e+03 | 1.120e+03 | 1 | 3 | -1 |
| 11 | 1408804745 | 6.000e+02 | 6.000e+02 | 1.120e+03 | 4 | 4 | -1 |
| 11 | 1408807503 | 1.200e+02 | 6.000e+02 | 1.120e+03 | 3 | 2 | -1 |
| 11 | 1408807144 | 8.000e+02 | 9.000e+02 | 1.120e+03 | 2 | 2 | -1 |
| 11 | 1408809849 | 3.600e+03 | 3.600e+03 | 1.120e+03 | 5 | 5 | -1 |
| 11 | 1408803676 | 8.000e+02 | 9.000e+02 | 1.120e+03 | 0 | 2 | -1 |
| 11 | 1408817241 | 9.000e+02 | 9.000e+02 | 1.120e+03 | 3 | 3 | -1 |
| 11 | 1408811947 | 1.200e+02 | 1.000e+03 | 1.120e+03 | 0 | 0 | -1 |
| 11 | 1408811461 | 1.200e+03 | 1.200e+03 | 1.120e+03 | 3 | 3 | -1 |
| 11 | 1408814406 | 6.000e+02 | 1.100e+03 | 1.120e+03 | 4 | 5 | -1 |
| 11 | 1408806191 | 2.000e+02 | 2.000e+02 | 1.120e+03 | 2 | 2 | -1 |
| 11 | 1408814584 | 5.000e+02 | 1.120e+03 | 1.120e+03 | 1 | 1 | -1 |
| 11 | 1408819661 | 1.150e+03 | 1.150e+03 | 1.120e+03 | 4 | 5 | -1 |
| 11 | 1408812882 | 1.600e+02 | 3.000e+02 | 1.120e+03 | 2 | 3 | -1 |
| 11 | 1408808711 | 4.000e+02 | 9.000e+02 | 1.120e+03 | 4 | 3 | -1 |
| 11 | 1408801183 | 1.300e+02 | 1.000e+03 | 1.120e+03 | 0 | 1 | -1 |
| 11 | 1408809769 | 1.000e+02 | 1.000e+03 | 1.120e+03 | 1 | 1 | -1 |
| 11 | 1408799162 | 1.200e+03 | 1.120e+03 | 1.120e+03 | 4 | 4 | -1 |
| 11 | 1408805091 | 1.200e+02 | 1.000e+03 | 1.120e+03 | 4 | 4 | -1 |
| 11 | 1408806651 | 4.000e+02 | 6.000e+02 | 1.120e+03 | 3 | 3 | -1 |
| 11 | 1408816332 | 5.000e+02 | 9.000e+02 | 1.120e+03 | 3 | 3 | -1 |
| 11 | 1408809326 | 1.800e+02 | 1.800e+02 | 1.120e+03 | 3 | 3 | -1 |
| 11 | 1408808791 | 7.200e+02 | 7.200e+02 | 1.120e+03 | 4 | 4 | -1 |
| 11 | 1408801643 | 5.000e+02 | 1.000e+03 | 1.120e+03 | 3 | 4 | -1 |
| 11 | 1408807809 | 1.000e+03 | 1.000e+03 | 1.120e+03 | 4 | 4 | -1 |
| 11 | 1408797111 | 3.000e+02 | 5.000e+02 | 1.120e+03 | 3 | 3 | -1 |
| 11 | 1408808623 | 1.000e+03 | 1.000e+03 | 1.120e+03 | 3 | 3 | -1 |
| 11 | 1408800367 | 1.000e+03 | 1.000e+03 | 1.120e+03 | 4 | 4 | -1 |
| 11 | 1408808143 | 1.800e+02 | 1.800e+02 | 1.120e+03 | 3 | 1 | -1 |
| 11 | 1408802365 | 1.100e+03 | 1.100e+03 | 1.120e+03 | 4 | 4 | -1 |
| 11 | 1408812007 | 8.000e+02 | 8.000e+02 | 1.120e+03 | 3 | 3 | -1 |
| 11 | 1408812647 | 1.000e+02 | 1.000e+02 | 1.120e+03 | 3 | 3 | -1 |
| 11 | 1408805344 | 9.500e+02 | 9.500e+02 | 1.120e+03 | 3 | 3 | -1 |
| 11 | 1408816236 | 7.200e+02 | 1.000e+03 | 1.120e+03 | 3 | 3 | -1 |
| 11 | 1408814110 | 3.000e+02 | 1.000e+03 | 1.120e+03 | 2 | 3 | -1 |
| 11 | 1408802237 | 4.500e+02 | 1.050e+03 | 1.120e+03 | 3 | 4 | -1 |
| 11 | 1408811941 | 1.200e+02 | 1.200e+02 | 1.120e+03 | 3 | 3 | -1 |
| 11 | 1408820913 | 3.000e+03 | 1.800e+03 | 1.120e+03 | 3 | 3 | -1 |
| 11 | 1408812832 | 8.000e+02 | 8.000e+02 | 1.120e+03 | 4 | 4 | -1 |
| 12 | 1398776357 | 1.000e+01 | 1.000e+01 | 1.000e+02 | 3 | 3 | 1  |
| 12 | 1398887847 | 2.000e+00 | 2.000e+00 | 1.000e+02 | 3 | 3 | 1  |
| 12 | 1398892516 | 1.000e+02 | 1.000e+02 | 1.000e+02 | 3 | 3 | 1  |
| 12 | 1417185554 | 1.600e+01 | 1.600e+01 | 1.000e+02 | 2 | 2 | 1  |
| 12 | 1398888387 | 1.000e+03 | 1.000e+03 | 1.000e+02 | 3 | 3 | 1  |
| 12 | 1398891149 | 3.000e+03 | 2.000e+02 | 1.000e+02 | 3 | 3 | 1  |
| 12 | 1398776407 | 1.300e+01 | 1.300e+01 | 1.000e+02 | 2 | 3 | 1  |
| 12 | 1398891375 | 3.000e+00 | 3.000e+00 | 1.000e+02 | 2 | 3 | 1  |
| 12 | 1398776634 | 1.000e+00 | 1.000e+00 | 1.000e+02 | 1 | 1 | 1  |
| 12 | 1398786088 | 1.000e+01 | 1.000e+01 | 1.000e+02 | 3 | 3 | 1  |
| 12 | 1398892622 | 3.000e+00 | 3.000e+00 | 1.000e+02 | 2 | 2 | 1  |
| 12 | 1398888074 | 5.000e+02 | 5.000e+02 | 1.000e+02 | 3 | 3 | 1  |
| 12 | 1398867272 | 3.000e+00 | 4.000e+00 | 1.000e+02 | 2 | 4 | 1  |

|    |            |           |           |           |   |   |   |
|----|------------|-----------|-----------|-----------|---|---|---|
| 12 | 1398862805 | 6.000e+00 | 6.000e+00 | 1.000e+02 | 3 | 3 | 1 |
| 12 | 1398869031 | 8.000e+01 | 8.000e+01 | 1.000e+02 | 2 | 2 | 1 |
| 12 | 1398889535 | 2.000e+00 | 6.000e+00 | 1.000e+02 | 1 | 1 | 1 |
| 12 | 1398888718 | 5.000e+00 | 1.500e+01 | 1.000e+02 | 2 | 2 | 1 |
| 12 | 1398785751 | 8.000e+00 | 8.000e+00 | 1.000e+02 | 3 | 3 | 1 |
| 12 | 1398889130 | 5.000e+02 | 5.000e+02 | 1.000e+02 | 2 | 2 | 1 |
| 12 | 1398891104 | 7.000e+01 | 7.000e+01 | 1.000e+02 | 4 | 4 | 1 |
| 12 | 1398865276 | 5.000e+01 | 5.000e+01 | 1.000e+02 | 3 | 3 | 1 |
| 12 | 1398888893 | 5.000e+01 | 1.200e+02 | 1.000e+02 | 2 | 2 | 1 |
| 12 | 1398891402 | 2.500e+00 | 2.500e+00 | 1.000e+02 | 4 | 4 | 1 |
| 12 | 1398888834 | 5.000e+01 | 7.000e+01 | 1.000e+02 | 2 | 2 | 1 |
| 12 | 1398784937 | 1.000e+01 | 1.000e+01 | 1.000e+02 | 0 | 1 | 1 |
| 12 | 1398888358 | 2.000e+00 | 2.000e+00 | 1.000e+02 | 3 | 3 | 1 |
| 12 | 1398890003 | 2.000e+01 | 2.000e+01 | 1.000e+02 | 3 | 3 | 1 |
| 12 | 1398891430 | 1.000e+01 | 1.000e+01 | 1.000e+02 | 4 | 4 | 1 |
| 12 | 1398776404 | 1.000e+00 | 1.000e+00 | 1.000e+02 | 2 | 4 | 1 |
| 12 | 1398867266 | 2.500e+00 | 1.500e+01 | 1.000e+02 | 3 | 3 | 1 |
| 12 | 1398778952 | 1.000e+00 | 1.000e+02 | 1.000e+02 | 4 | 4 | 1 |
| 12 | 1398865301 | 1.500e+01 | 1.500e+01 | 1.000e+02 | 3 | 3 | 1 |
| 12 | 1398889925 | 9.000e+00 | 9.000e+00 | 1.000e+02 | 3 | 3 | 1 |
| 12 | 1398776517 | 1.000e+01 | 6.000e+00 | 1.000e+02 | 0 | 1 | 1 |
| 12 | 1408795563 | 1.000e+01 | 1.000e+01 | 1.000e+02 | 3 | 4 | 1 |
| 12 | 1408809584 | 2.000e+01 | 2.000e+01 | 1.000e+02 | 2 | 2 | 1 |
| 12 | 1408805301 | 1.500e+01 | 1.500e+01 | 1.000e+02 | 0 | 0 | 1 |
| 12 | 1408805468 | 3.500e+01 | 3.500e+01 | 1.000e+02 | 3 | 3 | 1 |
| 12 | 1408812462 | 5.000e+01 | 5.000e+01 | 1.000e+02 | 2 | 2 | 1 |
| 12 | 1408808932 | 2.000e+02 | 2.000e+02 | 1.000e+02 | 3 | 3 | 1 |
| 12 | 1408803130 | 2.500e+01 | 2.500e+01 | 1.000e+02 | 2 | 2 | 1 |
| 12 | 1408805005 | 1.000e+01 | 1.000e+01 | 1.000e+02 | 2 | 2 | 1 |
| 12 | 1408810956 | 4.500e+01 | 7.000e+01 | 1.000e+02 | 3 | 3 | 1 |
| 12 | 1408815379 | 5.000e+00 | 5.000e+01 | 1.000e+02 | 3 | 3 | 1 |
| 12 | 1408803877 | 3.000e+01 | 3.000e+01 | 1.000e+02 | 2 | 2 | 1 |
| 12 | 1408806920 | 5.000e+00 | 5.000e+00 | 1.000e+02 | 0 | 0 | 1 |
| 12 | 1408807550 | 5.000e+01 | 7.000e+01 | 1.000e+02 | 2 | 3 | 1 |
| 12 | 1408804745 | 0.000e+00 | 1.000e+01 | 1.000e+02 | 0 | 2 | 1 |
| 12 | 1408807503 | 2.000e+00 | 2.000e+00 | 1.000e+02 | 2 | 2 | 1 |
| 12 | 1408807144 | 2.500e+01 | 2.500e+01 | 1.000e+02 | 3 | 3 | 1 |
| 12 | 1408809849 | 2.000e+01 | 2.000e+01 | 1.000e+02 | 2 | 2 | 1 |
| 12 | 1408803676 | 3.000e+00 | 1.000e+01 | 1.000e+02 | 2 | 2 | 1 |
| 12 | 1408817241 | 5.000e+00 | 5.000e+00 | 1.000e+02 | 3 | 3 | 1 |
| 12 | 1408811947 | 5.000e+00 | 3.500e+01 | 1.000e+02 | 2 | 2 | 1 |
| 12 | 1408811461 | 1.500e+01 | 2.000e+01 | 1.000e+02 | 3 | 3 | 1 |
| 12 | 1408814406 | 5.000e+01 | 5.000e+01 | 1.000e+02 | 2 | 2 | 1 |
| 12 | 1408806191 | 1.000e+01 | 1.000e+01 | 1.000e+02 | 3 | 3 | 1 |
| 12 | 1408814584 | 1.000e+03 | 1.000e+03 | 1.000e+02 | 0 | 0 | 1 |
| 12 | 1408819661 | 1.000e+00 | 1.000e+00 | 1.000e+02 | 1 | 1 | 1 |
| 12 | 1408812882 | 2.500e+00 | 2.500e+00 | 1.000e+02 | 3 | 3 | 1 |
| 12 | 1408808711 | 1.000e+02 | 1.000e+02 | 1.000e+02 | 3 | 3 | 1 |
| 12 | 1408801183 | 5.000e+01 | 5.000e+01 | 1.000e+02 | 3 | 3 | 1 |
| 12 | 1408809769 | 1.000e+01 | 1.000e+01 | 1.000e+02 | 2 | 2 | 1 |
| 12 | 1408799162 | 5.000e+00 | 5.000e+00 | 1.000e+02 | 3 | 3 | 1 |
| 12 | 1408805091 | 2.000e+00 | 2.000e+00 | 1.000e+02 | 3 | 3 | 1 |
| 12 | 1408806651 | 5.000e+00 | 5.000e+00 | 1.000e+02 | 3 | 3 | 1 |
| 12 | 1408816332 | 5.000e+01 | 5.000e+01 | 1.000e+02 | 1 | 1 | 1 |
| 12 | 1408809326 | 3.000e+00 | 3.000e+00 | 1.000e+02 | 3 | 3 | 1 |
| 12 | 1408808791 | 1.000e+01 | 2.000e+01 | 1.000e+02 | 3 | 3 | 1 |
| 12 | 1408801643 | 1.600e+01 | 5.000e+01 | 1.000e+02 | 2 | 1 | 1 |
| 12 | 1408807809 | 1.500e+01 | 1.500e+01 | 1.000e+02 | 2 | 2 | 1 |
| 12 | 1408797111 | 1.000e+01 | 1.000e+01 | 1.000e+02 | 2 | 2 | 1 |
| 12 | 1408808623 | 3.000e+01 | 3.000e+01 | 1.000e+02 | 1 | 1 | 1 |
| 12 | 1408800367 | 5.000e+02 | 5.000e+02 | 1.000e+02 | 2 | 2 | 1 |
| 12 | 1408808143 | 2.000e+01 | 5.000e+01 | 1.000e+02 | 2 | 3 | 1 |
| 12 | 1408802365 | 4.000e+00 | 5.000e+00 | 1.000e+02 | 1 | 3 | 1 |
| 12 | 1408812007 | 1.000e+01 | 1.000e+01 | 1.000e+02 | 3 | 3 | 1 |
| 12 | 1408812647 | 7.500e+00 | 1.000e+01 | 1.000e+02 | 3 | 3 | 1 |
| 12 | 1408805344 | 1.000e+03 | 1.000e+02 | 1.000e+02 | 3 | 3 | 1 |
| 12 | 1408816236 | 1.000e+01 | 1.000e+01 | 1.000e+02 | 3 | 3 | 1 |
| 12 | 1408814110 | 1.800e+02 | 1.800e+02 | 1.000e+02 | 5 | 5 | 1 |
| 12 | 1408802237 | 2.500e+01 | 4.000e+01 | 1.000e+02 | 3 | 3 | 1 |

|    |            |           |           |           |   |   |    |
|----|------------|-----------|-----------|-----------|---|---|----|
| 12 | 1408811941 | 3.500e+01 | 3.500e+01 | 1.000e+02 | 3 | 3 | 1  |
| 12 | 1408820913 | 6.000e+01 | 8.000e+01 | 1.000e+02 | 3 | 3 | 1  |
| 12 | 1408812832 | 1.500e+01 | 1.500e+01 | 1.000e+02 | 3 | 3 | 1  |
| 13 | 1398776357 | 1.000e+01 | 1.000e+01 | 1.930e+01 | 0 | 0 | -1 |
| 13 | 1398887847 | 3.000e+00 | 1.500e+01 | 1.930e+01 | 0 | 2 | -1 |
| 13 | 1398892516 | 2.000e+00 | 1.900e+01 | 1.930e+01 | 0 | 3 | -1 |
| 13 | 1417185554 | 3.000e+01 | 3.000e+01 | 1.930e+01 | 0 | 0 | -1 |
| 13 | 1398888387 | 7.000e+00 | 7.000e+00 | 1.930e+01 | 0 | 0 | -1 |
| 13 | 1398891149 | 5.000e+00 | 5.000e+00 | 1.930e+01 | 0 | 0 | -1 |
| 13 | 1398776407 | 2.000e+01 | 2.000e+01 | 1.930e+01 | 2 | 2 | -1 |
| 13 | 1398891375 | 1.500e+01 | 1.500e+01 | 1.930e+01 | 0 | 0 | -1 |
| 13 | 1398776634 | 2.000e+00 | 3.000e+00 | 1.930e+01 | 0 | 1 | -1 |
| 13 | 1398786088 | 5.000e+00 | 5.000e+00 | 1.930e+01 | 0 | 0 | -1 |
| 13 | 1398892622 | 3.000e+00 | 3.000e+00 | 1.930e+01 | 0 | 0 | -1 |
| 13 | 1398888074 | 1.500e+01 | 1.500e+01 | 1.930e+01 | 0 | 0 | -1 |
| 13 | 1398867272 | 3.000e+00 | 1.500e+01 | 1.930e+01 | 0 | 2 | -1 |
| 13 | 1398862805 | 3.000e+00 | 1.900e+01 | 1.930e+01 | 0 | 3 | -1 |
| 13 | 1398869031 | 4.000e+00 | 4.000e+00 | 1.930e+01 | 0 | 0 | -1 |
| 13 | 1398889535 | 5.000e+00 | 1.000e+01 | 1.930e+01 | 0 | 0 | -1 |
| 13 | 1398888718 | 3.000e+00 | 1.500e+01 | 1.930e+01 | 0 | 1 | -1 |
| 13 | 1398785751 | 1.000e+01 | 1.200e+01 | 1.930e+01 | 3 | 3 | -1 |
| 13 | 1398889130 | 2.000e+01 | 2.000e+01 | 1.930e+01 | 1 | 1 | -1 |
| 13 | 1398891104 | 5.000e+01 | 3.000e+01 | 1.930e+01 | 0 | 0 | -1 |
| 13 | 1398865276 | 6.000e+00 | 1.500e+01 | 1.930e+01 | 2 | 2 | -1 |
| 13 | 1398888893 | 1.200e+01 | 1.200e+01 | 1.930e+01 | 0 | 0 | -1 |
| 13 | 1398891402 | 1.500e+01 | 1.500e+01 | 1.930e+01 | 1 | 4 | -1 |
| 13 | 1398888834 | 1.500e+01 | 2.000e+01 | 1.930e+01 | 0 | 3 | -1 |
| 13 | 1398784937 | 1.500e+01 | 2.000e+01 | 1.930e+01 | 0 | 1 | -1 |
| 13 | 1398888358 | 4.000e+00 | 4.000e+00 | 1.930e+01 | 2 | 2 | -1 |
| 13 | 1398890003 | 2.000e+00 | 1.000e+01 | 1.930e+01 | 0 | 4 | -1 |
| 13 | 1398891430 | 1.000e+01 | 1.900e+01 | 1.930e+01 | 0 | 2 | -1 |
| 13 | 1398776404 | 1.000e+01 | 1.500e+01 | 1.930e+01 | 0 | 1 | -1 |
| 13 | 1398867266 | 5.000e+00 | 1.500e+01 | 1.930e+01 | 2 | 3 | -1 |
| 13 | 1398778952 | 3.000e+02 | 3.000e+02 | 1.930e+01 | 3 | 3 | -1 |
| 13 | 1398865301 | 3.000e+00 | 7.000e+00 | 1.930e+01 | 0 | 1 | -1 |
| 13 | 1398889925 | 2.700e+01 | 2.700e+01 | 1.930e+01 | 1 | 1 | -1 |
| 13 | 1398776517 | 1.500e+01 | 2.000e+01 | 1.930e+01 | 2 | 4 | -1 |
| 13 | 1408795563 | 3.000e+00 | 2.000e+01 | 1.930e+01 | 4 | 5 | -1 |
| 13 | 1408809584 | 1.500e+01 | 2.000e+01 | 1.930e+01 | 1 | 2 | -1 |
| 13 | 1408805301 | 1.200e+01 | 1.200e+01 | 1.930e+01 | 0 | 0 | -1 |
| 13 | 1408805468 | 0.000e+00 | 1.900e+01 | 1.930e+01 | 0 | 3 | -1 |
| 13 | 1408812462 | 8.000e+00 | 8.000e+00 | 1.930e+01 | 3 | 2 | -1 |
| 13 | 1408808932 | 1.500e+01 | 1.500e+01 | 1.930e+01 | 3 | 3 | -1 |
| 13 | 1408803130 | 8.000e+00 | 8.000e+00 | 1.930e+01 | 3 | 3 | -1 |
| 13 | 1408805005 | 2.000e+00 | 1.700e+01 | 1.930e+01 | 0 | 3 | -1 |
| 13 | 1408810956 | 5.000e+00 | 1.500e+01 | 1.930e+01 | 0 | 1 | -1 |
| 13 | 1408815379 | 4.000e+00 | 1.500e+01 | 1.930e+01 | 0 | 3 | -1 |
| 13 | 1408803877 | 4.000e+00 | 1.500e+01 | 1.930e+01 | 1 | 2 | -1 |
| 13 | 1408806920 | 3.000e+01 | 3.000e+01 | 1.930e+01 | 0 | 0 | -1 |
| 13 | 1408807550 | 4.000e+00 | 1.500e+01 | 1.930e+01 | 0 | 1 | -1 |
| 13 | 1408804745 | 5.000e+00 | 1.500e+01 | 1.930e+01 | 0 | 0 | -1 |
| 13 | 1408807503 | 6.000e+00 | 1.900e+01 | 1.930e+01 | 0 | 1 | -1 |
| 13 | 1408807144 | 4.100e+01 | 3.000e+01 | 1.930e+01 | 0 | 0 | -1 |
| 13 | 1408809849 | 2.500e+01 | 2.500e+01 | 1.930e+01 | 0 | 0 | -1 |
| 13 | 1408803676 | 1.500e+01 | 1.700e+01 | 1.930e+01 | 0 | 0 | -1 |
| 13 | 1408817241 | 7.000e+00 | 7.000e+00 | 1.930e+01 | 4 | 4 | -1 |
| 13 | 1408811947 | 1.700e+01 | 1.700e+01 | 1.930e+01 | 2 | 2 | -1 |
| 13 | 1408811461 | 8.000e+00 | 1.500e+01 | 1.930e+01 | 0 | 1 | -1 |
| 13 | 1408814406 | 6.000e+00 | 1.900e+01 | 1.930e+01 | 0 | 5 | -1 |
| 13 | 1408806191 | 1.500e+01 | 1.500e+01 | 1.930e+01 | 2 | 2 | -1 |
| 13 | 1408814584 | 1.000e+01 | 1.930e+01 | 1.930e+01 | 0 | 1 | -1 |
| 13 | 1408819661 | 8.000e+00 | 8.000e+00 | 1.930e+01 | 0 | 0 | -1 |
| 13 | 1408812882 | 8.000e+00 | 1.200e+01 | 1.930e+01 | 2 | 2 | -1 |
| 13 | 1408808711 | 3.000e+00 | 1.900e+01 | 1.930e+01 | 0 | 3 | -1 |
| 13 | 1408801183 | 2.000e+01 | 2.000e+01 | 1.930e+01 | 0 | 0 | -1 |
| 13 | 1408809769 | 1.000e+01 | 1.500e+01 | 1.930e+01 | 0 | 2 | -1 |
| 13 | 1408799162 | 3.000e+01 | 3.000e+01 | 1.930e+01 | 3 | 3 | -1 |
| 13 | 1408805091 | 1.500e+01 | 1.500e+01 | 1.930e+01 | 4 | 4 | -1 |
| 13 | 1408806651 | 2.000e+01 | 2.000e+01 | 1.930e+01 | 2 | 3 | -1 |



|    |            |           |           |           |   |   |    |
|----|------------|-----------|-----------|-----------|---|---|----|
| 13 | 1408816332 | 4.000e+00 | 1.900e+01 | 1.930e+01 | 0 | 0 | -1 |
| 13 | 1408809326 | 1.000e+01 | 1.400e+01 | 1.930e+01 | 3 | 3 | -1 |
| 13 | 1408808791 | 5.000e+00 | 5.000e+00 | 1.930e+01 | 0 | 0 | -1 |
| 13 | 1408801643 | 3.000e+00 | 3.000e+00 | 1.930e+01 | 3 | 0 | -1 |
| 13 | 1408807809 | 1.000e+01 | 2.000e+01 | 1.930e+01 | 0 | 0 | -1 |
| 13 | 1408797111 | 5.000e+00 | 1.500e+01 | 1.930e+01 | 0 | 2 | -1 |
| 13 | 1408808623 | 9.000e+00 | 1.500e+01 | 1.930e+01 | 2 | 3 | -1 |
| 13 | 1408800367 | 2.000e+01 | 2.000e+01 | 1.930e+01 | 1 | 2 | -1 |
| 13 | 1408808143 | 9.000e+00 | 1.500e+01 | 1.930e+01 | 2 | 3 | -1 |
| 13 | 1408802365 | 2.000e+01 | 2.000e+01 | 1.930e+01 | 0 | 4 | -1 |
| 13 | 1408812007 | 4.000e+00 | 1.900e+01 | 1.930e+01 | 0 | 3 | -1 |
| 13 | 1408812647 | 2.000e+00 | 2.000e+00 | 1.930e+01 | 0 | 0 | -1 |
| 13 | 1408805344 | 1.500e+01 | 1.500e+01 | 1.930e+01 | 0 | 0 | -1 |
| 13 | 1408816236 | 6.000e+00 | 1.800e+01 | 1.930e+01 | 1 | 3 | -1 |
| 13 | 1408814110 | 5.000e+01 | 2.000e+01 | 1.930e+01 | 0 | 0 | -1 |
| 13 | 1408802237 | 9.000e+00 | 0.000e+00 | 1.930e+01 | 1 | 0 | -1 |
| 13 | 1408811941 | 1.500e+01 | 1.500e+01 | 1.930e+01 | 2 | 2 | -1 |
| 13 | 1408820913 | 1.000e+01 | 2.000e+01 | 1.930e+01 | 1 | 1 | -1 |
| 13 | 1408812832 | 2.000e+00 | 1.500e+01 | 1.930e+01 | 1 | 3 | -1 |
| 14 | 1398776357 | 1.640e+03 | 1.648e+03 | 1.647e+03 | 1 | 3 | 5  |
| 14 | 1398887847 | 8.000e+02 | 8.000e+02 | 1.647e+03 | 0 | 0 | 5  |
| 14 | 1398892516 | 1.400e+03 | 1.400e+03 | 1.647e+03 | 3 | 3 | 5  |
| 14 | 1417185554 | 1.773e+03 | 1.773e+03 | 1.647e+03 | 4 | 3 | 5  |
| 14 | 1398888387 | 1.798e+03 | 1.798e+03 | 1.647e+03 | 0 | 2 | 5  |
| 14 | 1398891149 | 1.800e+03 | 1.647e+03 | 1.647e+03 | 2 | 2 | 5  |
| 14 | 1398776407 | 1.680e+03 | 1.580e+03 | 1.647e+03 | 2 | 2 | 5  |
| 14 | 1398891375 | 1.580e+03 | 1.580e+03 | 1.647e+03 | 4 | 4 | 5  |
| 14 | 1398776634 | 1.590e+03 | 1.647e+03 | 1.647e+03 | 1 | 2 | 5  |
| 14 | 1398786088 | 1.600e+03 | 1.650e+03 | 1.647e+03 | 3 | 4 | 5  |
| 14 | 1398892622 | 1.683e+03 | 1.673e+03 | 1.647e+03 | 3 | 4 | 5  |
| 14 | 1398888074 | 1.800e+03 | 1.700e+03 | 1.647e+03 | 3 | 3 | 5  |
| 14 | 1398867272 | 1.880e+03 | 1.700e+03 | 1.647e+03 | 1 | 2 | 5  |
| 14 | 1398862805 | 1.600e+03 | 1.647e+03 | 1.647e+03 | 1 | 5 | 5  |
| 14 | 1398869031 | 1.680e+03 | 1.680e+03 | 1.647e+03 | 2 | 4 | 5  |
| 14 | 1398889535 | 1.700e+03 | 1.647e+03 | 1.647e+03 | 0 | 3 | 5  |
| 14 | 1398888718 | 1.592e+03 | 1.642e+03 | 1.647e+03 | 0 | 1 | 5  |
| 14 | 1398785751 | 1.700e+03 | 1.700e+03 | 1.647e+03 | 2 | 3 | 5  |
| 14 | 1398889130 | 1.885e+03 | 1.885e+03 | 1.647e+03 | 2 | 2 | 5  |
| 14 | 1398891104 | 1.850e+03 | 1.647e+03 | 1.647e+03 | 3 | 4 | 5  |
| 14 | 1398865276 | 1.860e+03 | 1.600e+03 | 1.647e+03 | 0 | 4 | 5  |
| 14 | 1398888893 | 1.860e+03 | 1.648e+03 | 1.647e+03 | 2 | 2 | 5  |
| 14 | 1398891402 | 1.680e+03 | 1.647e+03 | 1.647e+03 | 2 | 4 | 5  |
| 14 | 1398888834 | 1.521e+03 | 1.647e+03 | 1.647e+03 | 2 | 5 | 5  |
| 14 | 1398784937 | 1.678e+03 | 1.647e+03 | 1.647e+03 | 1 | 5 | 5  |
| 14 | 1398888358 | 1.580e+03 | 1.647e+03 | 1.647e+03 | 2 | 2 | 5  |
| 14 | 1398890003 | 1.920e+03 | 1.647e+03 | 1.647e+03 | 1 | 5 | 5  |
| 14 | 1398891430 | 1.750e+03 | 1.700e+03 | 1.647e+03 | 3 | 4 | 5  |
| 14 | 1398776404 | 1.820e+03 | 1.647e+03 | 1.647e+03 | 1 | 4 | 5  |
| 14 | 1398867266 | 1.530e+03 | 1.645e+03 | 1.647e+03 | 2 | 4 | 5  |
| 14 | 1398778952 | 1.600e+03 | 1.610e+03 | 1.647e+03 | 3 | 4 | 5  |
| 14 | 1398865301 | 8.600e+02 | 1.600e+03 | 1.647e+03 | 1 | 3 | 5  |
| 14 | 1398889925 | 1.750e+03 | 1.750e+03 | 1.647e+03 | 1 | 1 | 5  |
| 14 | 1398776517 | 1.800e+03 | 1.640e+03 | 1.647e+03 | 3 | 3 | 5  |
| 14 | 1408795563 | 1.785e+03 | 1.677e+03 | 1.647e+03 | 1 | 3 | 5  |
| 14 | 1408809584 | 1.642e+03 | 1.642e+03 | 1.647e+03 | 5 | 5 | 5  |
| 14 | 1408805301 | 1.470e+03 | 1.500e+03 | 1.647e+03 | 1 | 1 | 5  |
| 14 | 1408805468 | 1.600e+03 | 1.650e+03 | 1.647e+03 | 1 | 4 | 5  |
| 14 | 1408812462 | 1.590e+03 | 1.647e+03 | 1.647e+03 | 1 | 3 | 5  |
| 14 | 1408808932 | 1.600e+03 | 1.647e+03 | 1.647e+03 | 1 | 3 | 5  |
| 14 | 1408803130 | 1.779e+03 | 1.647e+03 | 1.647e+03 | 3 | 4 | 5  |
| 14 | 1408805005 | 0.000e+00 | 1.647e+03 | 1.647e+03 | 0 | 3 | 5  |
| 14 | 1408810956 | 1.650e+03 | 1.650e+03 | 1.647e+03 | 3 | 3 | 5  |
| 14 | 1408815379 | 1.590e+03 | 1.647e+03 | 1.647e+03 | 3 | 5 | 5  |
| 14 | 1408803877 | 1.640e+03 | 1.640e+03 | 1.647e+03 | 4 | 4 | 5  |
| 14 | 1408806920 | 1.646e+03 | 1.647e+03 | 1.647e+03 | 3 | 3 | 5  |
| 14 | 1408807550 | 1.642e+03 | 1.642e+03 | 1.647e+03 | 4 | 5 | 5  |
| 14 | 1408804745 | 1.796e+03 | 1.700e+03 | 1.647e+03 | 3 | 3 | 5  |
| 14 | 1408807503 | 1.400e+03 | 1.647e+03 | 1.647e+03 | 0 | 3 | 5  |
| 14 | 1408807144 | 1.650e+03 | 1.647e+03 | 1.647e+03 | 2 | 4 | 5  |

|    |            |           |           |           |   |   |    |
|----|------------|-----------|-----------|-----------|---|---|----|
| 14 | 1408809849 | 1.500e+03 | 1.600e+03 | 1.647e+03 | 3 | 3 | 5  |
| 14 | 1408803676 | 1.690e+03 | 1.650e+03 | 1.647e+03 | 0 | 0 | 5  |
| 14 | 1408817241 | 1.590e+03 | 1.647e+03 | 1.647e+03 | 2 | 5 | 5  |
| 14 | 1408811947 | 1.535e+03 | 1.535e+03 | 1.647e+03 | 2 | 2 | 5  |
| 14 | 1408811461 | 1.740e+03 | 1.650e+03 | 1.647e+03 | 3 | 3 | 5  |
| 14 | 1408814406 | 1.400e+03 | 1.400e+03 | 1.647e+03 | 3 | 3 | 5  |
| 14 | 1408806191 | 1.680e+03 | 1.647e+03 | 1.647e+03 | 4 | 4 | 5  |
| 14 | 1408814584 | 1.700e+03 | 1.647e+03 | 1.647e+03 | 0 | 3 | 5  |
| 14 | 1408819661 | 1.495e+03 | 1.647e+03 | 1.647e+03 | 3 | 3 | 5  |
| 14 | 1408812882 | 1.630e+03 | 1.630e+03 | 1.647e+03 | 1 | 3 | 5  |
| 14 | 1408808711 | 1.642e+03 | 1.642e+03 | 1.647e+03 | 5 | 5 | 5  |
| 14 | 1408801183 | 1.642e+03 | 1.647e+03 | 1.647e+03 | 4 | 5 | 5  |
| 14 | 1408809769 | 1.600e+03 | 1.600e+03 | 1.647e+03 | 1 | 2 | 5  |
| 14 | 1408799162 | 1.643e+03 | 1.643e+03 | 1.647e+03 | 5 | 5 | 5  |
| 14 | 1408805091 | 1.800e+03 | 1.600e+03 | 1.647e+03 | 2 | 2 | 5  |
| 14 | 1408806651 | 1.600e+03 | 1.650e+03 | 1.647e+03 | 3 | 4 | 5  |
| 14 | 1408816332 | 1.500e+03 | 1.630e+03 | 1.647e+03 | 4 | 2 | 5  |
| 14 | 1408809326 | 1.657e+03 | 1.657e+03 | 1.647e+03 | 2 | 2 | 5  |
| 14 | 1408808791 | 1.560e+03 | 1.620e+03 | 1.647e+03 | 3 | 2 | 5  |
| 14 | 1408801643 | 1.600e+03 | 1.600e+03 | 1.647e+03 | 1 | 2 | 5  |
| 14 | 1408807809 | 1.742e+03 | 1.647e+03 | 1.647e+03 | 4 | 4 | 5  |
| 14 | 1408797111 | 1.700e+03 | 1.647e+03 | 1.647e+03 | 3 | 3 | 5  |
| 14 | 1408808623 | 1.595e+03 | 1.647e+03 | 1.647e+03 | 2 | 3 | 5  |
| 14 | 1408800367 | 1.642e+03 | 1.642e+03 | 1.647e+03 | 4 | 4 | 5  |
| 14 | 1408808143 | 1.750e+03 | 1.700e+03 | 1.647e+03 | 3 | 3 | 5  |
| 14 | 1408802365 | 1.610e+03 | 1.647e+03 | 1.647e+03 | 1 | 3 | 5  |
| 14 | 1408812007 | 1.740e+03 | 1.647e+03 | 1.647e+03 | 3 | 5 | 5  |
| 14 | 1408812647 | 1.600e+03 | 1.647e+03 | 1.647e+03 | 3 | 5 | 5  |
| 14 | 1408805344 | 1.820e+03 | 1.647e+03 | 1.647e+03 | 3 | 3 | 5  |
| 14 | 1408816236 | 1.642e+03 | 1.642e+03 | 1.647e+03 | 4 | 4 | 5  |
| 14 | 1408814110 | 1.520e+03 | 1.630e+03 | 1.647e+03 | 3 | 4 | 5  |
| 14 | 1408802237 | 1.649e+03 | 1.649e+03 | 1.647e+03 | 3 | 4 | 5  |
| 14 | 1408811941 | 1.457e+03 | 1.630e+03 | 1.647e+03 | 3 | 3 | 5  |
| 14 | 1408820913 | 1.580e+03 | 1.600e+03 | 1.647e+03 | 3 | 2 | 5  |
| 14 | 1408812832 | 1.671e+03 | 1.671e+03 | 1.647e+03 | 4 | 4 | 5  |
| 15 | 1398776357 | 1.200e+01 | 1.200e+01 | 3.200e+00 | 2 | 2 | -1 |
| 15 | 1398887847 | 5.000e+00 | 5.000e+00 | 3.200e+00 | 2 | 2 | -1 |
| 15 | 1398892516 | 4.000e+00 | 4.000e+00 | 3.200e+00 | 3 | 3 | -1 |
| 15 | 1417185554 | 2.000e+00 | 2.000e+00 | 3.200e+00 | 1 | 1 | -1 |
| 15 | 1398888387 | 3.000e+00 | 3.000e+00 | 3.200e+00 | 3 | 5 | -1 |
| 15 | 1398891149 | 4.500e-01 | 4.500e-01 | 3.200e+00 | 3 | 3 | -1 |
| 15 | 1398776407 | 4.000e+00 | 4.000e+00 | 3.200e+00 | 3 | 3 | -1 |
| 15 | 1398891375 | 7.000e+00 | 7.000e+00 | 3.200e+00 | 1 | 1 | -1 |
| 15 | 1398776634 | 4.000e+00 | 4.000e+00 | 3.200e+00 | 0 | 2 | -1 |
| 15 | 1398786088 | 6.000e+00 | 3.000e+00 | 3.200e+00 | 3 | 3 | -1 |
| 15 | 1398892622 | 4.000e+00 | 4.000e+00 | 3.200e+00 | 5 | 5 | -1 |
| 15 | 1398888074 | 5.000e+00 | 5.000e+00 | 3.200e+00 | 3 | 3 | -1 |
| 15 | 1398867272 | 2.000e+00 | 3.000e+00 | 3.200e+00 | 3 | 4 | -1 |
| 15 | 1398862805 | 5.000e+00 | 5.000e+00 | 3.200e+00 | 2 | 2 | -1 |
| 15 | 1398869031 | 1.500e+00 | 1.500e+00 | 3.200e+00 | 3 | 3 | -1 |
| 15 | 1398889535 | 1.000e+00 | 3.000e+00 | 3.200e+00 | 1 | 1 | -1 |
| 15 | 1398888718 | 6.000e+00 | 4.000e+00 | 3.200e+00 | 2 | 3 | -1 |
| 15 | 1398785751 | 3.000e+00 | 3.000e+00 | 3.200e+00 | 1 | 1 | -1 |
| 15 | 1398889130 | 4.800e+01 | 4.800e+01 | 3.200e+00 | 2 | 2 | -1 |
| 15 | 1398891104 | 3.000e+00 | 3.000e+00 | 3.200e+00 | 4 | 4 | -1 |
| 15 | 1398865276 | 3.000e+00 | 3.000e+00 | 3.200e+00 | 4 | 4 | -1 |
| 15 | 1398888893 | 1.500e+00 | 1.500e+00 | 3.200e+00 | 2 | 2 | -1 |
| 15 | 1398891402 | 2.000e+00 | 2.500e+00 | 3.200e+00 | 2 | 3 | -1 |
| 15 | 1398888834 | 2.000e+00 | 2.000e+00 | 3.200e+00 | 1 | 1 | -1 |
| 15 | 1398784937 | 5.000e+00 | 5.000e+00 | 3.200e+00 | 1 | 1 | -1 |
| 15 | 1398888358 | 6.000e+00 | 3.500e+00 | 3.200e+00 | 2 | 2 | -1 |
| 15 | 1398890003 | 3.000e+00 | 3.000e+00 | 3.200e+00 | 3 | 4 | -1 |
| 15 | 1398891430 | 4.000e+00 | 4.000e+00 | 3.200e+00 | 4 | 4 | -1 |
| 15 | 1398776404 | 3.000e+00 | 3.000e+00 | 3.200e+00 | 2 | 3 | -1 |
| 15 | 1398867266 | 2.000e+00 | 3.000e+00 | 3.200e+00 | 3 | 3 | -1 |
| 15 | 1398778952 | 2.000e+00 | 2.000e+00 | 3.200e+00 | 4 | 4 | -1 |
| 15 | 1398865301 | 1.000e+00 | 1.000e+00 | 3.200e+00 | 3 | 3 | -1 |
| 15 | 1398889925 | 1.500e+00 | 1.500e+00 | 3.200e+00 | 3 | 3 | -1 |
| 15 | 1398776517 | 5.000e-01 | 2.000e+00 | 3.200e+00 | 0 | 2 | -1 |

|    |            |           |           |           |   |   |    |
|----|------------|-----------|-----------|-----------|---|---|----|
| 15 | 1408795563 | 2.000e+00 | 3.000e+00 | 3.200e+00 | 3 | 4 | -1 |
| 15 | 1408809584 | 2.000e+00 | 2.000e+00 | 3.200e+00 | 2 | 2 | -1 |
| 15 | 1408805301 | 7.000e-01 | 7.000e-01 | 3.200e+00 | 2 | 3 | -1 |
| 15 | 1408805468 | 5.000e+00 | 4.000e+00 | 3.200e+00 | 2 | 3 | -1 |
| 15 | 1408812462 | 4.000e+00 | 4.000e+00 | 3.200e+00 | 1 | 1 | -1 |
| 15 | 1408808932 | 2.000e+00 | 2.500e+00 | 3.200e+00 | 3 | 3 | -1 |
| 15 | 1408803130 | 1.000e+00 | 1.000e+00 | 3.200e+00 | 2 | 2 | -1 |
| 15 | 1408805005 | 4.000e+00 | 4.000e+00 | 3.200e+00 | 3 | 3 | -1 |
| 15 | 1408810956 | 5.000e-01 | 2.000e+00 | 3.200e+00 | 2 | 3 | -1 |
| 15 | 1408815379 | 1.000e+00 | 1.800e+00 | 3.200e+00 | 2 | 3 | -1 |
| 15 | 1408803877 | 1.000e+00 | 1.000e+00 | 3.200e+00 | 2 | 2 | -1 |
| 15 | 1408806920 | 3.000e+00 | 3.000e+00 | 3.200e+00 | 3 | 3 | -1 |
| 15 | 1408807550 | 1.000e+00 | 3.000e+00 | 3.200e+00 | 2 | 2 | -1 |
| 15 | 1408804745 | 2.000e+00 | 2.300e+00 | 3.200e+00 | 1 | 1 | -1 |
| 15 | 1408807503 | 2.000e+00 | 3.000e+00 | 3.200e+00 | 3 | 3 | -1 |
| 15 | 1408807144 | 2.000e+00 | 3.000e+00 | 3.200e+00 | 1 | 2 | -1 |
| 15 | 1408809849 | 2.000e+00 | 3.000e+00 | 3.200e+00 | 2 | 3 | -1 |
| 15 | 1408803676 | 2.000e+00 | 3.000e+00 | 3.200e+00 | 3 | 3 | -1 |
| 15 | 1408817241 | 3.500e+00 | 3.500e+00 | 3.200e+00 | 4 | 4 | -1 |
| 15 | 1408811947 | 7.000e+00 | 4.000e+00 | 3.200e+00 | 3 | 3 | -1 |
| 15 | 1408811461 | 1.000e+00 | 1.000e+00 | 3.200e+00 | 2 | 2 | -1 |
| 15 | 1408814406 | 3.000e+00 | 3.000e+00 | 3.200e+00 | 0 | 5 | -1 |
| 15 | 1408806191 | 1.000e+00 | 1.000e+00 | 3.200e+00 | 4 | 4 | -1 |
| 15 | 1408814584 | 5.000e-01 | 5.000e-01 | 3.200e+00 | 3 | 3 | -1 |
| 15 | 1408819661 | 1.000e+00 | 2.000e+00 | 3.200e+00 | 1 | 2 | -1 |
| 15 | 1408812882 | 4.000e+00 | 4.000e+00 | 3.200e+00 | 2 | 3 | -1 |
| 15 | 1408808711 | 6.000e+00 | 4.000e+00 | 3.200e+00 | 4 | 4 | -1 |
| 15 | 1408801183 | 2.000e+00 | 2.000e+00 | 3.200e+00 | 3 | 3 | -1 |
| 15 | 1408809769 | 2.000e+00 | 2.000e+00 | 3.200e+00 | 3 | 3 | -1 |
| 15 | 1408799162 | 3.000e+00 | 3.000e+00 | 3.200e+00 | 3 | 3 | -1 |
| 15 | 1408805091 | 2.000e+00 | 2.000e+00 | 3.200e+00 | 3 | 3 | -1 |
| 15 | 1408806651 | 1.000e+00 | 2.000e+00 | 3.200e+00 | 3 | 3 | -1 |
| 15 | 1408816332 | 2.000e+00 | 3.000e+00 | 3.200e+00 | 1 | 1 | -1 |
| 15 | 1408809326 | 2.000e+01 | 5.000e+00 | 3.200e+00 | 0 | 1 | -1 |
| 15 | 1408808791 | 3.000e+00 | 3.000e+00 | 3.200e+00 | 4 | 4 | -1 |
| 15 | 1408801643 | 2.000e+00 | 4.000e+00 | 3.200e+00 | 0 | 0 | -1 |
| 15 | 1408807809 | 3.000e+00 | 3.000e+00 | 3.200e+00 | 2 | 3 | -1 |
| 15 | 1408797111 | 1.000e+00 | 1.000e+00 | 3.200e+00 | 3 | 3 | -1 |
| 15 | 1408808623 | 3.000e+00 | 3.000e+00 | 3.200e+00 | 3 | 3 | -1 |
| 15 | 1408800367 | 4.000e+00 | 4.000e+00 | 3.200e+00 | 1 | 3 | -1 |
| 15 | 1408808143 | 5.000e-01 | 5.000e-01 | 3.200e+00 | 3 | 2 | -1 |
| 15 | 1408802365 | 6.000e+00 | 4.000e+00 | 3.200e+00 | 2 | 4 | -1 |
| 15 | 1408812007 | 3.000e+00 | 3.000e+00 | 3.200e+00 | 3 | 3 | -1 |
| 15 | 1408812647 | 7.500e+00 | 6.000e+00 | 3.200e+00 | 5 | 5 | -1 |
| 15 | 1408805344 | 1.500e+00 | 1.500e+00 | 3.200e+00 | 3 | 3 | -1 |
| 15 | 1408816236 | 1.000e+00 | 3.000e+00 | 3.200e+00 | 3 | 3 | -1 |
| 15 | 1408814110 | 4.000e-01 | 1.000e+00 | 3.200e+00 | 2 | 2 | -1 |
| 15 | 1408802237 | 5.000e-01 | 5.000e-01 | 3.200e+00 | 1 | 1 | -1 |
| 15 | 1408811941 | 8.000e+00 | 4.000e+00 | 3.200e+00 | 3 | 3 | -1 |
| 15 | 1408820913 | 2.000e+00 | 2.000e+00 | 3.200e+00 | 3 | 2 | -1 |
| 15 | 1408812832 | 4.000e+00 | 4.000e+00 | 3.200e+00 | 3 | 3 | -1 |
| 16 | 1398776357 | 5.000e+00 | 5.000e+00 | 1.600e+00 | 1 | 1 | 4  |
| 16 | 1398887847 | 5.000e+00 | 5.000e+00 | 1.600e+00 | 2 | 2 | 4  |
| 16 | 1398892516 | 2.000e+00 | 2.000e+00 | 1.600e+00 | 3 | 3 | 4  |
| 16 | 1417185554 | 6.000e+00 | 6.000e+00 | 1.600e+00 | 3 | 3 | 4  |
| 16 | 1398888387 | 1.000e+01 | 1.000e+01 | 1.600e+00 | 3 | 3 | 4  |
| 16 | 1398891149 | 4.000e+00 | 2.000e+00 | 1.600e+00 | 2 | 3 | 4  |
| 16 | 1398776407 | 2.300e+00 | 2.300e+00 | 1.600e+00 | 3 | 3 | 4  |
| 16 | 1398891375 | 5.000e+00 | 2.000e+00 | 1.600e+00 | 0 | 0 | 4  |
| 16 | 1398776634 | 2.000e+00 | 2.000e+00 | 1.600e+00 | 2 | 2 | 4  |
| 16 | 1398786088 | 4.000e+00 | 4.000e+00 | 1.600e+00 | 4 | 4 | 4  |
| 16 | 1398892622 | 7.000e+00 | 2.000e+00 | 1.600e+00 | 3 | 3 | 4  |
| 16 | 1398888074 | 5.000e+00 | 2.500e+00 | 1.600e+00 | 3 | 3 | 4  |
| 16 | 1398867272 | 2.000e+00 | 2.000e+00 | 1.600e+00 | 3 | 4 | 4  |
| 16 | 1398862805 | 2.000e+00 | 1.500e+00 | 1.600e+00 | 0 | 3 | 4  |
| 16 | 1398869031 | 4.000e+00 | 2.000e+00 | 1.600e+00 | 0 | 3 | 4  |
| 16 | 1398889535 | 3.000e+00 | 3.000e+00 | 1.600e+00 | 3 | 3 | 4  |
| 16 | 1398888718 | 3.000e+00 | 2.000e+00 | 1.600e+00 | 0 | 1 | 4  |
| 16 | 1398785751 | 2.000e+00 | 2.000e+00 | 1.600e+00 | 4 | 4 | 4  |

|    |            |           |           |           |   |   |    |
|----|------------|-----------|-----------|-----------|---|---|----|
| 16 | 1398889130 | 1.200e+01 | 1.200e+01 | 1.600e+00 | 2 | 2 | 4  |
| 16 | 1398891104 | 2.000e+00 | 2.000e+00 | 1.600e+00 | 1 | 1 | 4  |
| 16 | 1398865276 | 8.000e+00 | 6.000e+00 | 1.600e+00 | 3 | 3 | 4  |
| 16 | 1398888893 | 3.000e+00 | 3.000e+00 | 1.600e+00 | 3 | 3 | 4  |
| 16 | 1398891402 | 3.000e+00 | 2.000e+00 | 1.600e+00 | 3 | 3 | 4  |
| 16 | 1398888834 | 2.000e+00 | 2.000e+00 | 1.600e+00 | 1 | 3 | 4  |
| 16 | 1398784937 | 3.000e+00 | 2.000e+00 | 1.600e+00 | 0 | 1 | 4  |
| 16 | 1398888358 | 3.000e+00 | 3.000e+00 | 1.600e+00 | 2 | 0 | 4  |
| 16 | 1398890003 | 3.000e+00 | 3.000e+00 | 1.600e+00 | 2 | 4 | 4  |
| 16 | 1398891430 | 3.000e+00 | 3.000e+00 | 1.600e+00 | 2 | 3 | 4  |
| 16 | 1398776404 | 2.000e+00 | 2.000e+00 | 1.600e+00 | 4 | 4 | 4  |
| 16 | 1398867266 | 5.000e+00 | 2.000e+00 | 1.600e+00 | 2 | 4 | 4  |
| 16 | 1398778952 | 2.000e+00 | 2.000e+00 | 1.600e+00 | 3 | 3 | 4  |
| 16 | 1398865301 | 2.000e+00 | 2.000e+00 | 1.600e+00 | 2 | 3 | 4  |
| 16 | 1398889925 | 6.000e+00 | 6.000e+00 | 1.600e+00 | 2 | 2 | 4  |
| 16 | 1398776517 | 1.000e+00 | 2.000e+00 | 1.600e+00 | 3 | 3 | 4  |
| 16 | 1408795563 | 1.500e+00 | 1.500e+00 | 1.600e+00 | 5 | 5 | 4  |
| 16 | 1408809584 | 1.500e+00 | 1.500e+00 | 1.600e+00 | 4 | 4 | 4  |
| 16 | 1408805301 | 3.500e+00 | 1.000e+00 | 1.600e+00 | 3 | 3 | 4  |
| 16 | 1408805468 | 2.000e+00 | 2.000e+00 | 1.600e+00 | 4 | 5 | 4  |
| 16 | 1408812462 | 2.000e+00 | 1.500e+00 | 1.600e+00 | 3 | 3 | 4  |
| 16 | 1408808932 | 2.000e+00 | 2.000e+00 | 1.600e+00 | 3 | 3 | 4  |
| 16 | 1408803130 | 1.000e+00 | 1.000e+00 | 1.600e+00 | 3 | 3 | 4  |
| 16 | 1408805005 | 3.000e+00 | 2.000e+00 | 1.600e+00 | 5 | 4 | 4  |
| 16 | 1408810956 | 1.150e+00 | 1.150e+00 | 1.600e+00 | 4 | 4 | 4  |
| 16 | 1408815379 | 1.500e+00 | 1.500e+00 | 1.600e+00 | 3 | 4 | 4  |
| 16 | 1408803877 | 4.000e+00 | 2.000e+00 | 1.600e+00 | 2 | 3 | 4  |
| 16 | 1408806920 | 3.000e+00 | 3.000e+00 | 1.600e+00 | 3 | 3 | 4  |
| 16 | 1408807550 | 1.000e+00 | 1.200e+00 | 1.600e+00 | 2 | 3 | 4  |
| 16 | 1408804745 | 2.000e+00 | 2.000e+00 | 1.600e+00 | 2 | 2 | 4  |
| 16 | 1408807503 | 1.500e+00 | 1.500e+00 | 1.600e+00 | 4 | 4 | 4  |
| 16 | 1408807144 | 1.000e+00 | 1.000e+00 | 1.600e+00 | 3 | 4 | 4  |
| 16 | 1408809849 | 2.000e+00 | 2.000e+00 | 1.600e+00 | 3 | 3 | 4  |
| 16 | 1408803676 | 2.000e+00 | 2.000e+00 | 1.600e+00 | 2 | 2 | 4  |
| 16 | 1408817241 | 2.000e+00 | 1.600e+00 | 1.600e+00 | 3 | 3 | 4  |
| 16 | 1408811947 | 2.500e+00 | 2.000e+00 | 1.600e+00 | 3 | 3 | 4  |
| 16 | 1408811461 | 2.070e+00 | 2.070e+00 | 1.600e+00 | 4 | 4 | 4  |
| 16 | 1408814406 | 1.000e+00 | 1.500e+00 | 1.600e+00 | 1 | 1 | 4  |
| 16 | 1408806191 | 2.000e+00 | 2.000e+00 | 1.600e+00 | 2 | 3 | 4  |
| 16 | 1408814584 | 2.000e+00 | 2.000e+00 | 1.600e+00 | 1 | 3 | 4  |
| 16 | 1408819661 | 2.000e+00 | 2.000e+00 | 1.600e+00 | 5 | 5 | 4  |
| 16 | 1408812882 | 2.000e+00 | 2.000e+00 | 1.600e+00 | 3 | 3 | 4  |
| 16 | 1408808711 | 2.000e+00 | 2.000e+00 | 1.600e+00 | 3 | 3 | 4  |
| 16 | 1408801183 | 2.000e+00 | 2.000e+00 | 1.600e+00 | 0 | 2 | 4  |
| 16 | 1408809769 | 2.000e+00 | 2.000e+00 | 1.600e+00 | 4 | 4 | 4  |
| 16 | 1408799162 | 1.700e+00 | 1.700e+00 | 1.600e+00 | 4 | 4 | 4  |
| 16 | 1408805091 | 4.000e+00 | 4.000e+00 | 1.600e+00 | 5 | 5 | 4  |
| 16 | 1408806651 | 2.000e+00 | 2.000e+00 | 1.600e+00 | 2 | 2 | 4  |
| 16 | 1408816332 | 2.000e+00 | 2.000e+00 | 1.600e+00 | 3 | 3 | 4  |
| 16 | 1408809326 | 3.500e+00 | 3.500e+00 | 1.600e+00 | 3 | 3 | 4  |
| 16 | 1408808791 | 0.000e+00 | 2.500e+00 | 1.600e+00 | 0 | 4 | 4  |
| 16 | 1408801643 | 3.000e+00 | 3.000e+00 | 1.600e+00 | 4 | 3 | 4  |
| 16 | 1408807809 | 2.000e+00 | 2.000e+00 | 1.600e+00 | 5 | 5 | 4  |
| 16 | 1408797111 | 2.000e+00 | 2.000e+00 | 1.600e+00 | 4 | 4 | 4  |
| 16 | 1408808623 | 3.000e+00 | 2.000e+00 | 1.600e+00 | 3 | 3 | 4  |
| 16 | 1408800367 | 2.500e+00 | 2.300e+00 | 1.600e+00 | 3 | 3 | 4  |
| 16 | 1408808143 | 1.000e+01 | 1.000e+01 | 1.600e+00 | 3 | 3 | 4  |
| 16 | 1408802365 | 3.000e+00 | 2.000e+00 | 1.600e+00 | 2 | 3 | 4  |
| 16 | 1408812007 | 4.000e+00 | 1.600e+00 | 1.600e+00 | 2 | 4 | 4  |
| 16 | 1408812647 | 5.000e+00 | 3.500e+00 | 1.600e+00 | 3 | 3 | 4  |
| 16 | 1408805344 | 2.000e+00 | 2.000e+00 | 1.600e+00 | 4 | 4 | 4  |
| 16 | 1408816236 | 3.000e+00 | 2.000e+00 | 1.600e+00 | 3 | 3 | 4  |
| 16 | 1408814110 | 5.000e+00 | 2.000e+00 | 1.600e+00 | 1 | 2 | 4  |
| 16 | 1408802237 | 3.500e+00 | 3.500e+00 | 1.600e+00 | 2 | 2 | 4  |
| 16 | 1408811941 | 2.500e+00 | 2.500e+00 | 1.600e+00 | 4 | 4 | 4  |
| 16 | 1408820913 | 4.000e+00 | 3.000e+00 | 1.600e+00 | 2 | 2 | 4  |
| 16 | 1408812832 | 2.000e+00 | 2.000e+00 | 1.600e+00 | 4 | 4 | 4  |
| 17 | 1398776357 | 2.650e+02 | 2.320e+02 | 2.083e+02 | 4 | 5 | -1 |
| 17 | 1398887847 | 2.380e+02 | 2.380e+02 | 2.083e+02 | 3 | 3 | -1 |

|    |            |           |           |           |   |   |    |
|----|------------|-----------|-----------|-----------|---|---|----|
| 17 | 1398892516 | 2.000e+02 | 2.000e+02 | 2.083e+02 | 2 | 3 | -1 |
| 17 | 1417185554 | 2.160e+02 | 2.160e+02 | 2.083e+02 | 4 | 4 | -1 |
| 17 | 1398888387 | 1.000e+02 | 1.500e+02 | 2.083e+02 | 3 | 3 | -1 |
| 17 | 1398891149 | 1.000e+02 | 1.000e+02 | 2.083e+02 | 2 | 2 | -1 |
| 17 | 1398776407 | 2.060e+02 | 2.060e+02 | 2.083e+02 | 4 | 5 | -1 |
| 17 | 1398891375 | 3.470e+02 | 2.080e+02 | 2.083e+02 | 4 | 1 | -1 |
| 17 | 1398776634 | 2.700e+02 | 2.000e+02 | 2.083e+02 | 2 | 2 | -1 |
| 17 | 1398786088 | 2.800e+02 | 2.080e+02 | 2.083e+02 | 4 | 4 | -1 |
| 17 | 1398892622 | 2.060e+02 | 2.060e+02 | 2.083e+02 | 5 | 5 | -1 |
| 17 | 1398888074 | 2.070e+02 | 2.070e+02 | 2.083e+02 | 4 | 4 | -1 |
| 17 | 1398867272 | 2.160e+02 | 2.160e+02 | 2.083e+02 | 4 | 4 | -1 |
| 17 | 1398862805 | 1.300e+02 | 1.300e+02 | 2.083e+02 | 2 | 2 | -1 |
| 17 | 1398869031 | 1.400e+02 | 1.900e+02 | 2.083e+02 | 2 | 2 | -1 |
| 17 | 1398889535 | 1.000e+03 | 5.000e+02 | 2.083e+02 | 0 | 1 | -1 |
| 17 | 1398888718 | 6.400e+01 | 1.640e+02 | 2.083e+02 | 2 | 2 | -1 |
| 17 | 1398785751 | 3.000e+02 | 2.100e+02 | 2.083e+02 | 2 | 2 | -1 |
| 17 | 1398889130 | 2.060e+02 | 2.060e+02 | 2.083e+02 | 5 | 5 | -1 |
| 17 | 1398891104 | 4.000e+02 | 4.000e+02 | 2.083e+02 | 3 | 4 | -1 |
| 17 | 1398865276 | 3.000e+02 | 3.000e+02 | 2.083e+02 | 3 | 3 | -1 |
| 17 | 1398888893 | 2.500e+02 | 2.500e+02 | 2.083e+02 | 0 | 0 | -1 |
| 17 | 1398891402 | 2.230e+02 | 2.100e+02 | 2.083e+02 | 5 | 5 | -1 |
| 17 | 1398888834 | 2.880e+02 | 2.080e+02 | 2.083e+02 | 2 | 2 | -1 |
| 17 | 1398784937 | 2.500e+02 | 2.080e+02 | 2.083e+02 | 3 | 4 | -1 |
| 17 | 1398888358 | 2.300e+02 | 2.080e+02 | 2.083e+02 | 2 | 3 | -1 |
| 17 | 1398890003 | 2.060e+02 | 2.060e+02 | 2.083e+02 | 5 | 5 | -1 |
| 17 | 1398891430 | 2.500e+02 | 2.500e+02 | 2.083e+02 | 5 | 5 | -1 |
| 17 | 1398776404 | 3.000e+02 | 3.000e+02 | 2.083e+02 | 2 | 3 | -1 |
| 17 | 1398867266 | 2.070e+02 | 2.070e+02 | 2.083e+02 | 4 | 4 | -1 |
| 17 | 1398778952 | 3.650e+02 | 2.050e+02 | 2.083e+02 | 1 | 3 | -1 |
| 17 | 1398865301 | 2.900e+02 | 2.900e+02 | 2.083e+02 | 3 | 3 | -1 |
| 17 | 1398889925 | 2.060e+02 | 2.060e+02 | 2.083e+02 | 5 | 5 | -1 |
| 17 | 1398776517 | 2.070e+02 | 2.070e+02 | 2.083e+02 | 3 | 4 | -1 |
| 17 | 1408795563 | 2.070e+02 | 2.070e+02 | 2.083e+02 | 4 | 5 | -1 |
| 17 | 1408809584 | 1.000e+02 | 2.000e+02 | 2.083e+02 | 2 | 3 | -1 |
| 17 | 1408805301 | 2.000e+02 | 2.150e+02 | 2.083e+02 | 1 | 1 | -1 |
| 17 | 1408805468 | 2.200e+02 | 2.200e+02 | 2.083e+02 | 5 | 5 | -1 |
| 17 | 1408812462 | 2.000e+02 | 2.000e+02 | 2.083e+02 | 3 | 3 | -1 |
| 17 | 1408808932 | 5.000e+01 | 1.500e+02 | 2.083e+02 | 2 | 3 | -1 |
| 17 | 1408803130 | 1.500e+02 | 1.500e+02 | 2.083e+02 | 3 | 3 | -1 |
| 17 | 1408805005 | 2.000e+02 | 2.000e+02 | 2.083e+02 | 3 | 3 | -1 |
| 17 | 1408810956 | 3.500e+02 | 3.000e+02 | 2.083e+02 | 3 | 3 | -1 |
| 17 | 1408815379 | 1.800e+02 | 2.000e+02 | 2.083e+02 | 3 | 4 | -1 |
| 17 | 1408803877 | 2.060e+02 | 2.060e+02 | 2.083e+02 | 5 | 5 | -1 |
| 17 | 1408806920 | 2.060e+02 | 2.060e+02 | 2.083e+02 | 5 | 5 | -1 |
| 17 | 1408807550 | 2.000e+02 | 2.000e+02 | 2.083e+02 | 2 | 4 | -1 |
| 17 | 1408804745 | 2.460e+02 | 2.100e+02 | 2.083e+02 | 3 | 3 | -1 |
| 17 | 1408807503 | 1.000e+02 | 1.500e+02 | 2.083e+02 | 2 | 2 | -1 |
| 17 | 1408807144 | 2.060e+02 | 2.060e+02 | 2.083e+02 | 4 | 4 | -1 |
| 17 | 1408809849 | 3.000e+02 | 2.200e+02 | 2.083e+02 | 3 | 3 | -1 |
| 17 | 1408803676 | 3.000e+02 | 2.500e+02 | 2.083e+02 | 1 | 1 | -1 |
| 17 | 1408817241 | 2.200e+02 | 2.100e+02 | 2.083e+02 | 4 | 4 | -1 |
| 17 | 1408811947 | 2.060e+02 | 2.060e+02 | 2.083e+02 | 4 | 4 | -1 |
| 17 | 1408811461 | 3.160e+02 | 2.600e+02 | 2.083e+02 | 3 | 3 | -1 |
| 17 | 1408814406 | 2.060e+02 | 2.060e+02 | 2.083e+02 | 5 | 5 | -1 |
| 17 | 1408806191 | 3.000e+02 | 3.000e+02 | 2.083e+02 | 3 | 3 | -1 |
| 17 | 1408814584 | 3.000e+02 | 2.500e+02 | 2.083e+02 | 1 | 1 | -1 |
| 17 | 1408819661 | 2.230e+02 | 2.100e+02 | 2.083e+02 | 3 | 4 | -1 |
| 17 | 1408812882 | 1.800e+02 | 1.800e+02 | 2.083e+02 | 1 | 2 | -1 |
| 17 | 1408808711 | 2.060e+02 | 2.060e+02 | 2.083e+02 | 5 | 5 | -1 |
| 17 | 1408801183 | 3.600e+02 | 3.150e+02 | 2.083e+02 | 4 | 4 | -1 |
| 17 | 1408809769 | 2.000e+02 | 2.000e+02 | 2.083e+02 | 3 | 3 | -1 |
| 17 | 1408799162 | 2.090e+02 | 2.090e+02 | 2.083e+02 | 5 | 5 | -1 |
| 17 | 1408805091 | 2.060e+02 | 2.060e+02 | 2.083e+02 | 5 | 5 | -1 |
| 17 | 1408806651 | 2.000e+02 | 2.080e+02 | 2.083e+02 | 4 | 4 | -1 |
| 17 | 1408816332 | 2.060e+02 | 2.060e+02 | 2.083e+02 | 5 | 5 | -1 |
| 17 | 1408809326 | 2.080e+02 | 2.080e+02 | 2.083e+02 | 4 | 4 | -1 |
| 17 | 1408808791 | 2.070e+02 | 2.070e+02 | 2.083e+02 | 3 | 3 | -1 |
| 17 | 1408801643 | 7.000e+02 | 5.000e+02 | 2.083e+02 | 0 | 1 | -1 |
| 17 | 1408807809 | 2.060e+02 | 2.060e+02 | 2.083e+02 | 4 | 4 | -1 |

|    |            |           |           |           |   |   |    |
|----|------------|-----------|-----------|-----------|---|---|----|
| 17 | 1408797111 | 4.000e+02 | 3.000e+02 | 2.083e+02 | 0 | 1 | -1 |
| 17 | 1408808623 | 2.060e+02 | 2.060e+02 | 2.083e+02 | 4 | 4 | -1 |
| 17 | 1408800367 | 2.000e+02 | 2.000e+02 | 2.083e+02 | 1 | 3 | -1 |
| 17 | 1408808143 | 1.300e+02 | 1.300e+02 | 2.083e+02 | 4 | 4 | -1 |
| 17 | 1408802365 | 1.020e+02 | 2.000e+02 | 2.083e+02 | 1 | 3 | -1 |
| 17 | 1408812007 | 2.500e+02 | 2.500e+02 | 2.083e+02 | 0 | 0 | -1 |
| 17 | 1408812647 | 2.000e+02 | 2.000e+02 | 2.083e+02 | 2 | 2 | -1 |
| 17 | 1408805344 | 2.000e+02 | 2.080e+02 | 2.083e+02 | 2 | 3 | -1 |
| 17 | 1408816236 | 2.520e+02 | 2.100e+02 | 2.083e+02 | 3 | 3 | -1 |
| 17 | 1408814110 | 2.000e+02 | 2.080e+02 | 2.083e+02 | 3 | 4 | -1 |
| 17 | 1408802237 | 2.100e+02 | 2.100e+02 | 2.083e+02 | 2 | 4 | -1 |
| 17 | 1408811941 | 2.640e+02 | 2.060e+02 | 2.083e+02 | 4 | 4 | -1 |
| 17 | 1408820913 | 2.010e+02 | 2.040e+02 | 2.083e+02 | 3 | 3 | -1 |
| 17 | 1408812832 | 3.000e+02 | 3.000e+02 | 2.083e+02 | 4 | 5 | -1 |
| 18 | 1398776357 | 5.000e+01 | 5.000e+01 | 2.000e+02 | 4 | 4 | 3  |
| 18 | 1398887847 | 9.000e+01 | 9.000e+01 | 2.000e+02 | 2 | 2 | 3  |
| 18 | 1398892516 | 5.000e+01 | 7.000e+01 | 2.000e+02 | 3 | 3 | 3  |
| 18 | 1417185554 | 6.000e+01 | 6.000e+01 | 2.000e+02 | 4 | 4 | 3  |
| 18 | 1398888387 | 2.000e+01 | 2.000e+01 | 2.000e+02 | 1 | 1 | 3  |
| 18 | 1398891149 | 2.000e+01 | 1.000e+02 | 2.000e+02 | 2 | 2 | 3  |
| 18 | 1398776407 | 1.200e+02 | 1.200e+02 | 2.000e+02 | 4 | 4 | 3  |
| 18 | 1398891375 | 1.200e+02 | 1.200e+02 | 2.000e+02 | 1 | 1 | 3  |
| 18 | 1398776634 | 1.000e+02 | 3.000e+02 | 2.000e+02 | 1 | 2 | 3  |
| 18 | 1398786088 | 1.000e+02 | 1.500e+02 | 2.000e+02 | 4 | 4 | 3  |
| 18 | 1398892622 | 3.000e+01 | 2.000e+02 | 2.000e+02 | 1 | 1 | 3  |
| 18 | 1398888074 | 2.000e+02 | 2.000e+02 | 2.000e+02 | 3 | 3 | 3  |
| 18 | 1398867272 | 7.500e+01 | 1.000e+02 | 2.000e+02 | 0 | 2 | 3  |
| 18 | 1398862805 | 1.200e+02 | 1.200e+02 | 2.000e+02 | 3 | 3 | 3  |
| 18 | 1398869031 | 1.600e+02 | 1.800e+02 | 2.000e+02 | 3 | 4 | 3  |
| 18 | 1398889535 | 1.000e+02 | 3.000e+02 | 2.000e+02 | 1 | 2 | 3  |
| 18 | 1398888718 | 1.500e+02 | 1.500e+02 | 2.000e+02 | 2 | 3 | 3  |
| 18 | 1398785751 | 1.000e+02 | 1.200e+02 | 2.000e+02 | 4 | 3 | 3  |
| 18 | 1398889130 | 5.000e+01 | 5.000e+01 | 2.000e+02 | 3 | 3 | 3  |
| 18 | 1398891104 | 1.500e+02 | 1.500e+02 | 2.000e+02 | 5 | 5 | 3  |
| 18 | 1398865276 | 2.000e+02 | 2.000e+02 | 2.000e+02 | 4 | 4 | 3  |
| 18 | 1398888893 | 1.500e+02 | 1.500e+02 | 2.000e+02 | 3 | 3 | 3  |
| 18 | 1398891402 | 1.120e+02 | 1.120e+02 | 2.000e+02 | 3 | 3 | 3  |
| 18 | 1398888834 | 1.800e+02 | 1.800e+02 | 2.000e+02 | 4 | 4 | 3  |
| 18 | 1398784937 | 1.500e+02 | 1.500e+02 | 2.000e+02 | 3 | 3 | 3  |
| 18 | 1398888358 | 1.200e+02 | 1.200e+02 | 2.000e+02 | 3 | 3 | 3  |
| 18 | 1398890003 | 2.000e+01 | 1.000e+02 | 2.000e+02 | 2 | 3 | 3  |
| 18 | 1398891430 | 1.500e+02 | 1.500e+02 | 2.000e+02 | 4 | 4 | 3  |
| 18 | 1398776404 | 1.500e+02 | 1.500e+02 | 2.000e+02 | 4 | 4 | 3  |
| 18 | 1398867266 | 1.500e+02 | 1.750e+02 | 2.000e+02 | 3 | 4 | 3  |
| 18 | 1398778952 | 1.000e+02 | 1.000e+02 | 2.000e+02 | 3 | 3 | 3  |
| 18 | 1398865301 | 1.500e+02 | 1.500e+02 | 2.000e+02 | 2 | 2 | 3  |
| 18 | 1398889925 | 1.500e+02 | 1.500e+02 | 2.000e+02 | 4 | 4 | 3  |
| 18 | 1398776517 | 1.500e+02 | 1.500e+02 | 2.000e+02 | 3 | 4 | 3  |
| 18 | 1408795563 | 1.500e+02 | 1.500e+02 | 2.000e+02 | 4 | 4 | 3  |
| 18 | 1408809584 | 1.500e+02 | 1.500e+02 | 2.000e+02 | 3 | 3 | 3  |
| 18 | 1408805301 | 4.000e+01 | 4.000e+01 | 2.000e+02 | 2 | 2 | 3  |
| 18 | 1408805468 | 9.000e+01 | 9.000e+01 | 2.000e+02 | 4 | 4 | 3  |
| 18 | 1408812462 | 2.000e+02 | 2.000e+02 | 2.000e+02 | 2 | 3 | 3  |
| 18 | 1408808932 | 1.500e+02 | 2.000e+02 | 2.000e+02 | 3 | 3 | 3  |
| 18 | 1408803130 | 1.000e+02 | 1.000e+02 | 2.000e+02 | 3 | 3 | 3  |
| 18 | 1408805005 | 5.000e+01 | 7.500e+01 | 2.000e+02 | 3 | 3 | 3  |
| 18 | 1408810956 | 1.000e+02 | 1.000e+02 | 2.000e+02 | 3 | 3 | 3  |
| 18 | 1408815379 | 1.000e+02 | 1.000e+02 | 2.000e+02 | 3 | 3 | 3  |
| 18 | 1408803877 | 5.000e+01 | 2.000e+02 | 2.000e+02 | 2 | 2 | 3  |
| 18 | 1408806920 | 1.000e+02 | 1.000e+02 | 2.000e+02 | 3 | 3 | 3  |
| 18 | 1408807550 | 8.000e+01 | 1.000e+02 | 2.000e+02 | 2 | 3 | 3  |
| 18 | 1408804745 | 1.200e+02 | 1.200e+02 | 2.000e+02 | 4 | 4 | 3  |
| 18 | 1408807503 | 1.600e+02 | 1.600e+02 | 2.000e+02 | 3 | 3 | 3  |
| 18 | 1408807144 | 1.000e+02 | 1.000e+02 | 2.000e+02 | 1 | 3 | 3  |
| 18 | 1408809849 | 2.000e+02 | 2.000e+02 | 2.000e+02 | 4 | 4 | 3  |
| 18 | 1408803676 | 3.000e+02 | 3.000e+02 | 2.000e+02 | 4 | 4 | 3  |
| 18 | 1408817241 | 1.500e+02 | 1.500e+02 | 2.000e+02 | 4 | 4 | 3  |
| 18 | 1408811947 | 1.750e+02 | 2.000e+02 | 2.000e+02 | 3 | 3 | 3  |
| 18 | 1408811461 | 1.200e+02 | 1.300e+02 | 2.000e+02 | 3 | 3 | 3  |

|    |            |           |           |           |   |   |    |
|----|------------|-----------|-----------|-----------|---|---|----|
| 18 | 1408814406 | 1.500e+02 | 1.500e+02 | 2.000e+02 | 3 | 3 | 3  |
| 18 | 1408806191 | 2.000e+02 | 2.000e+02 | 2.000e+02 | 4 | 4 | 3  |
| 18 | 1408814584 | 1.000e+02 | 1.500e+02 | 2.000e+02 | 3 | 3 | 3  |
| 18 | 1408819661 | 5.000e+01 | 5.000e+01 | 2.000e+02 | 0 | 0 | 3  |
| 18 | 1408812882 | 4.000e+02 | 4.000e+02 | 2.000e+02 | 3 | 4 | 3  |
| 18 | 1408808711 | 1.500e+02 | 1.500e+02 | 2.000e+02 | 4 | 4 | 3  |
| 18 | 1408801183 | 1.500e+02 | 1.500e+02 | 2.000e+02 | 3 | 4 | 3  |
| 18 | 1408809769 | 3.000e+02 | 3.000e+02 | 2.000e+02 | 3 | 3 | 3  |
| 18 | 1408799162 | 2.500e+02 | 2.500e+02 | 2.000e+02 | 4 | 4 | 3  |
| 18 | 1408805091 | 2.000e+01 | 2.000e+01 | 2.000e+02 | 3 | 3 | 3  |
| 18 | 1408806651 | 2.000e+02 | 2.000e+02 | 2.000e+02 | 2 | 3 | 3  |
| 18 | 1408816332 | 1.500e+02 | 1.500e+02 | 2.000e+02 | 3 | 3 | 3  |
| 18 | 1408809326 | 4.000e+02 | 4.000e+02 | 2.000e+02 | 1 | 1 | 3  |
| 18 | 1408808791 | 1.000e+02 | 1.000e+02 | 2.000e+02 | 4 | 4 | 3  |
| 18 | 1408801643 | 1.500e+02 | 1.500e+02 | 2.000e+02 | 2 | 2 | 3  |
| 18 | 1408807809 | 1.500e+02 | 1.500e+02 | 2.000e+02 | 3 | 3 | 3  |
| 18 | 1408797111 | 7.500e+01 | 7.500e+01 | 2.000e+02 | 3 | 3 | 3  |
| 18 | 1408808623 | 1.000e+02 | 1.000e+02 | 2.000e+02 | 3 | 3 | 3  |
| 18 | 1408800367 | 1.500e+02 | 1.500e+02 | 2.000e+02 | 4 | 4 | 3  |
| 18 | 1408808143 | 1.000e+02 | 1.000e+02 | 2.000e+02 | 2 | 3 | 3  |
| 18 | 1408802365 | 1.000e+02 | 1.000e+02 | 2.000e+02 | 4 | 4 | 3  |
| 18 | 1408812007 | 1.000e+02 | 1.000e+02 | 2.000e+02 | 0 | 0 | 3  |
| 18 | 1408812647 | 1.000e+00 | 1.000e+00 | 2.000e+02 | 1 | 1 | 3  |
| 18 | 1408805344 | 2.000e+02 | 2.000e+02 | 2.000e+02 | 2 | 2 | 3  |
| 18 | 1408816236 | 3.000e+02 | 3.000e+02 | 2.000e+02 | 3 | 3 | 3  |
| 18 | 1408814110 | 3.000e+02 | 2.600e+02 | 2.000e+02 | 2 | 2 | 3  |
| 18 | 1408802237 | 1.000e+02 | 1.200e+02 | 2.000e+02 | 2 | 3 | 3  |
| 18 | 1408811941 | 1.500e+02 | 1.500e+02 | 2.000e+02 | 3 | 3 | 3  |
| 18 | 1408820913 | 2.000e+02 | 2.000e+02 | 2.000e+02 | 3 | 3 | 3  |
| 18 | 1408812832 | 1.000e+02 | 1.000e+02 | 2.000e+02 | 3 | 3 | 3  |
| 19 | 1398776357 | 1.500e+01 | 1.500e+01 | 4.780e+01 | 2 | 2 | -1 |
| 19 | 1398887847 | 3.800e+01 | 3.800e+01 | 4.780e+01 | 2 | 2 | -1 |
| 19 | 1398892516 | 4.000e+01 | 4.000e+01 | 4.780e+01 | 2 | 3 | -1 |
| 19 | 1417185554 | 1.000e+01 | 1.000e+01 | 4.780e+01 | 1 | 0 | -1 |
| 19 | 1398888387 | 3.000e+01 | 3.000e+01 | 4.780e+01 | 3 | 3 | -1 |
| 19 | 1398891149 | 2.000e+01 | 3.000e+01 | 4.780e+01 | 3 | 3 | -1 |
| 19 | 1398776407 | 3.000e+01 | 4.000e+01 | 4.780e+01 | 3 | 3 | -1 |
| 19 | 1398891375 | 3.500e+01 | 4.000e+01 | 4.780e+01 | 2 | 3 | -1 |
| 19 | 1398776634 | 1.500e+01 | 5.000e+01 | 4.780e+01 | 0 | 3 | -1 |
| 19 | 1398786088 | 3.500e+01 | 3.500e+01 | 4.780e+01 | 4 | 4 | -1 |
| 19 | 1398892622 | 1.700e+01 | 1.700e+01 | 4.780e+01 | 2 | 2 | -1 |
| 19 | 1398888074 | 2.500e+01 | 3.500e+01 | 4.780e+01 | 3 | 3 | -1 |
| 19 | 1398867272 | 1.700e+01 | 3.000e+01 | 4.780e+01 | 3 | 3 | -1 |
| 19 | 1398862805 | 2.300e+01 | 4.700e+01 | 4.780e+01 | 1 | 3 | -1 |
| 19 | 1398869031 | 4.800e+01 | 4.800e+01 | 4.780e+01 | 0 | 0 | -1 |
| 19 | 1398889535 | 2.000e+01 | 4.000e+01 | 4.780e+01 | 2 | 2 | -1 |
| 19 | 1398888718 | 1.100e+01 | 3.100e+01 | 4.780e+01 | 2 | 2 | -1 |
| 19 | 1398785751 | 3.000e+01 | 3.000e+01 | 4.780e+01 | 2 | 2 | -1 |
| 19 | 1398889130 | 2.000e+01 | 2.000e+01 | 4.780e+01 | 1 | 1 | -1 |
| 19 | 1398891104 | 2.500e+01 | 3.500e+01 | 4.780e+01 | 4 | 4 | -1 |
| 19 | 1398865276 | 3.500e+01 | 4.000e+01 | 4.780e+01 | 3 | 3 | -1 |
| 19 | 1398888893 | 5.700e+01 | 5.700e+01 | 4.780e+01 | 3 | 3 | -1 |
| 19 | 1398891402 | 6.500e+01 | 5.000e+01 | 4.780e+01 | 4 | 4 | -1 |
| 19 | 1398888834 | 4.300e+01 | 4.300e+01 | 4.780e+01 | 1 | 2 | -1 |
| 19 | 1398784937 | 2.500e+01 | 5.000e+01 | 4.780e+01 | 0 | 0 | -1 |
| 19 | 1398888358 | 4.000e+01 | 4.000e+01 | 4.780e+01 | 2 | 2 | -1 |
| 19 | 1398890003 | 3.000e+01 | 4.500e+01 | 4.780e+01 | 2 | 3 | -1 |
| 19 | 1398891430 | 3.500e+01 | 3.500e+01 | 4.780e+01 | 4 | 4 | -1 |
| 19 | 1398776404 | 4.500e+01 | 4.500e+01 | 4.780e+01 | 2 | 4 | -1 |
| 19 | 1398867266 | 2.000e+01 | 3.000e+01 | 4.780e+01 | 3 | 3 | -1 |
| 19 | 1398778952 | 1.500e+01 | 4.500e+01 | 4.780e+01 | 3 | 3 | -1 |
| 19 | 1398865301 | 2.500e+01 | 2.500e+01 | 4.780e+01 | 3 | 3 | -1 |
| 19 | 1398889925 | 1.340e+02 | 1.340e+02 | 4.780e+01 | 3 | 3 | -1 |
| 19 | 1398776517 | 3.000e+00 | 4.000e+01 | 4.780e+01 | 3 | 2 | -1 |
| 19 | 1408795563 | 1.000e+02 | 1.000e+02 | 4.780e+01 | 3 | 3 | -1 |
| 19 | 1408809584 | 2.800e+01 | 3.500e+01 | 4.780e+01 | 4 | 4 | -1 |
| 19 | 1408805301 | 3.000e+01 | 3.000e+01 | 4.780e+01 | 1 | 1 | -1 |
| 19 | 1408805468 | 3.500e+01 | 4.200e+01 | 4.780e+01 | 3 | 3 | -1 |
| 19 | 1408812462 | 2.500e+01 | 4.000e+01 | 4.780e+01 | 2 | 2 | -1 |

|    |            |           |           |           |   |   |    |
|----|------------|-----------|-----------|-----------|---|---|----|
| 19 | 1408808932 | 2.000e+01 | 4.000e+01 | 4.780e+01 | 2 | 3 | -1 |
| 19 | 1408803130 | 2.300e+01 | 4.000e+01 | 4.780e+01 | 2 | 2 | -1 |
| 19 | 1408805005 | 1.700e+01 | 3.000e+01 | 4.780e+01 | 2 | 3 | -1 |
| 19 | 1408810956 | 3.500e+01 | 4.000e+01 | 4.780e+01 | 2 | 2 | -1 |
| 19 | 1408815379 | 2.200e+01 | 4.000e+01 | 4.780e+01 | 2 | 3 | -1 |
| 19 | 1408803877 | 2.000e+01 | 4.500e+01 | 4.780e+01 | 2 | 2 | -1 |
| 19 | 1408806920 | 5.400e+01 | 5.400e+01 | 4.780e+01 | 4 | 4 | -1 |
| 19 | 1408807550 | 2.000e+01 | 3.000e+01 | 4.780e+01 | 2 | 3 | -1 |
| 19 | 1408804745 | 4.600e+01 | 4.600e+01 | 4.780e+01 | 2 | 2 | -1 |
| 19 | 1408807503 | 2.500e+01 | 4.000e+01 | 4.780e+01 | 2 | 2 | -1 |
| 19 | 1408807144 | 4.000e+01 | 4.000e+01 | 4.780e+01 | 4 | 4 | -1 |
| 19 | 1408809849 | 2.700e+01 | 3.500e+01 | 4.780e+01 | 3 | 2 | -1 |
| 19 | 1408803676 | 4.000e+01 | 4.000e+01 | 4.780e+01 | 2 | 2 | -1 |
| 19 | 1408817241 | 2.000e+01 | 2.000e+01 | 4.780e+01 | 3 | 3 | -1 |
| 19 | 1408811947 | 2.600e+01 | 4.500e+01 | 4.780e+01 | 3 | 3 | -1 |
| 19 | 1408811461 | 4.700e+01 | 4.700e+01 | 4.780e+01 | 3 | 3 | -1 |
| 19 | 1408814406 | 5.000e+01 | 5.000e+01 | 4.780e+01 | 2 | 2 | -1 |
| 19 | 1408806191 | 2.000e+01 | 2.000e+01 | 4.780e+01 | 3 | 3 | -1 |
| 19 | 1408814584 | 4.000e+01 | 4.000e+01 | 4.780e+01 | 3 | 3 | -1 |
| 19 | 1408819661 | 2.500e+01 | 3.000e+01 | 4.780e+01 | 2 | 2 | -1 |
| 19 | 1408812882 | 3.200e+01 | 4.000e+01 | 4.780e+01 | 2 | 3 | -1 |
| 19 | 1408808711 | 4.000e+01 | 4.000e+01 | 4.780e+01 | 3 | 3 | -1 |
| 19 | 1408801183 | 2.500e+01 | 4.000e+01 | 4.780e+01 | 3 | 3 | -1 |
| 19 | 1408809769 | 5.000e+01 | 5.000e+01 | 4.780e+01 | 4 | 4 | -1 |
| 19 | 1408799162 | 5.000e+01 | 5.000e+01 | 4.780e+01 | 3 | 3 | -1 |
| 19 | 1408805091 | 2.600e+01 | 3.000e+01 | 4.780e+01 | 3 | 3 | -1 |
| 19 | 1408806651 | 5.000e+01 | 5.000e+01 | 4.780e+01 | 3 | 3 | -1 |
| 19 | 1408816332 | 3.500e+01 | 4.200e+01 | 4.780e+01 | 3 | 2 | -1 |
| 19 | 1408809326 | 3.200e+01 | 3.200e+01 | 4.780e+01 | 3 | 3 | -1 |
| 19 | 1408808791 | 5.000e+01 | 5.000e+01 | 4.780e+01 | 2 | 3 | -1 |
| 19 | 1408801643 | 1.500e+01 | 4.000e+01 | 4.780e+01 | 2 | 1 | -1 |
| 19 | 1408807809 | 2.500e+01 | 2.500e+01 | 4.780e+01 | 3 | 3 | -1 |
| 19 | 1408797111 | 1.500e+01 | 4.000e+01 | 4.780e+01 | 2 | 3 | -1 |
| 19 | 1408808623 | 2.500e+01 | 3.500e+01 | 4.780e+01 | 2 | 2 | -1 |
| 19 | 1408800367 | 5.000e+01 | 5.000e+01 | 4.780e+01 | 3 | 3 | -1 |
| 19 | 1408808143 | 2.000e+01 | 2.000e+01 | 4.780e+01 | 3 | 3 | -1 |
| 19 | 1408802365 | 4.400e+01 | 4.400e+01 | 4.780e+01 | 1 | 4 | -1 |
| 19 | 1408812007 | 1.500e+01 | 2.500e+01 | 4.780e+01 | 3 | 3 | -1 |
| 19 | 1408812647 | 1.800e+01 | 2.700e+01 | 4.780e+01 | 2 | 2 | -1 |
| 19 | 1408805344 | 2.500e+01 | 4.000e+01 | 4.780e+01 | 1 | 2 | -1 |
| 19 | 1408816236 | 3.000e+01 | 4.500e+01 | 4.780e+01 | 1 | 3 | -1 |
| 19 | 1408814110 | 4.500e+01 | 4.500e+01 | 4.780e+01 | 3 | 3 | -1 |
| 19 | 1408802237 | 2.500e+01 | 3.800e+01 | 4.780e+01 | 3 | 3 | -1 |
| 19 | 1408811941 | 3.500e+01 | 4.000e+01 | 4.780e+01 | 3 | 3 | -1 |
| 19 | 1408820913 | 5.000e+01 | 5.000e+01 | 4.780e+01 | 2 | 3 | -1 |
| 19 | 1408812832 | 3.000e+01 | 3.500e+01 | 4.780e+01 | 4 | 5 | -1 |
| 20 | 1398776357 | 1.000e+03 | 1.500e+05 | 1.000e+05 | 0 | 2 | 2  |
| 20 | 1398887847 | 3.000e+05 | 3.000e+05 | 1.000e+05 | 2 | 2 | 2  |
| 20 | 1398892516 | 1.500e+06 | 5.000e+06 | 1.000e+05 | 1 | 2 | 2  |
| 20 | 1417185554 | 5.000e+03 | 5.000e+03 | 1.000e+05 | 2 | 2 | 2  |
| 20 | 1398888387 | 5.000e+04 | 5.000e+04 | 1.000e+05 | 0 | 0 | 2  |
| 20 | 1398891149 | 1.000e+03 | 3.000e+03 | 1.000e+05 | 2 | 2 | 2  |
| 20 | 1398776407 | 1.000e+04 | 5.000e+04 | 1.000e+05 | 2 | 2 | 2  |
| 20 | 1398891375 | 1.000e+05 | 1.000e+05 | 1.000e+05 | 0 | 0 | 2  |
| 20 | 1398776634 | 2.000e+04 | 2.000e+04 | 1.000e+05 | 0 | 2 | 2  |
| 20 | 1398786088 | 2.500e+04 | 2.500e+04 | 1.000e+05 | 0 | 0 | 2  |
| 20 | 1398892622 | 5.700e+03 | 5.700e+03 | 1.000e+05 | 2 | 3 | 2  |
| 20 | 1398888074 | 3.000e+03 | 3.000e+02 | 1.000e+05 | 4 | 4 | 2  |
| 20 | 1398867272 | 1.200e+03 | 1.200e+04 | 1.000e+05 | 1 | 3 | 2  |
| 20 | 1398862805 | 2.000e+04 | 1.000e+05 | 1.000e+05 | 1 | 1 | 2  |
| 20 | 1398869031 | 5.500e+03 | 5.500e+03 | 1.000e+05 | 2 | 2 | 2  |
| 20 | 1398889535 | 6.000e+03 | 6.000e+04 | 1.000e+05 | 0 | 2 | 2  |
| 20 | 1398888718 | 1.000e+05 | 1.000e+05 | 1.000e+05 | 0 | 1 | 2  |
| 20 | 1398785751 | 1.000e+04 | 1.000e+04 | 1.000e+05 | 2 | 2 | 2  |
| 20 | 1398889130 | 5.000e+04 | 5.000e+04 | 1.000e+05 | 2 | 2 | 2  |
| 20 | 1398891104 | 3.000e+04 | 3.000e+04 | 1.000e+05 | 1 | 3 | 2  |
| 20 | 1398865276 | 3.000e+03 | 3.000e+00 | 1.000e+05 | 3 | 3 | 2  |
| 20 | 1398888893 | 1.355e+04 | 1.355e+04 | 1.000e+05 | 0 | 0 | 2  |
| 20 | 1398891402 | 1.000e+03 | 1.000e+06 | 1.000e+05 | 3 | 4 | 2  |



|    |            |           |           |           |   |   |   |
|----|------------|-----------|-----------|-----------|---|---|---|
| 20 | 1398888834 | 2.000e+05 | 2.000e+05 | 1.000e+05 | 1 | 3 | 2 |
| 20 | 1398784937 | 9.516e+05 | 9.516e+05 | 1.000e+05 | 0 | 2 | 2 |
| 20 | 1398888358 | 2.000e+07 | 2.000e+07 | 1.000e+05 | 2 | 2 | 2 |
| 20 | 1398890003 | 1.000e+04 | 1.000e+04 | 1.000e+05 | 1 | 3 | 2 |
| 20 | 1398891430 | 1.000e+04 | 1.000e+04 | 1.000e+05 | 3 | 3 | 2 |
| 20 | 1398776404 | 3.000e+04 | 3.000e+04 | 1.000e+05 | 1 | 2 | 2 |
| 20 | 1398867266 | 1.000e+03 | 1.000e+04 | 1.000e+05 | 0 | 2 | 2 |
| 20 | 1398778952 | 1.000e+05 | 1.000e+05 | 1.000e+05 | 3 | 3 | 2 |
| 20 | 1398865301 | 3.000e+05 | 3.000e+05 | 1.000e+05 | 3 | 3 | 2 |
| 20 | 1398889925 | 6.500e+03 | 6.500e+03 | 1.000e+05 | 2 | 2 | 2 |
| 20 | 1398776517 | 1.000e+03 | 1.500e+05 | 1.000e+05 | 2 | 2 | 2 |
| 20 | 1408795563 | 1.000e+05 | 1.000e+05 | 1.000e+05 | 0 | 4 | 2 |
| 20 | 1408809584 | 1.000e+05 | 1.000e+05 | 1.000e+05 | 4 | 4 | 2 |
| 20 | 1408805301 | 5.000e+03 | 5.000e+03 | 1.000e+05 | 1 | 1 | 2 |
| 20 | 1408805468 | 1.300e+04 | 1.300e+04 | 1.000e+05 | 1 | 1 | 2 |
| 20 | 1408812462 | 2.000e+05 | 2.000e+05 | 1.000e+05 | 1 | 1 | 2 |
| 20 | 1408808932 | 8.000e+04 | 1.000e+05 | 1.000e+05 | 3 | 3 | 2 |
| 20 | 1408803130 | 1.000e+04 | 1.000e+04 | 1.000e+05 | 2 | 2 | 2 |
| 20 | 1408805005 | 5.000e+02 | 1.000e+05 | 1.000e+05 | 0 | 2 | 2 |
| 20 | 1408810956 | 1.000e+04 | 3.000e+04 | 1.000e+05 | 1 | 1 | 2 |
| 20 | 1408815379 | 1.000e+05 | 1.000e+05 | 1.000e+05 | 2 | 3 | 2 |
| 20 | 1408803877 | 1.000e+03 | 1.000e+05 | 1.000e+05 | 2 | 2 | 2 |
| 20 | 1408806920 | 2.000e+06 | 2.000e+06 | 1.000e+05 | 0 | 0 | 2 |
| 20 | 1408807550 | 4.000e+04 | 4.000e+04 | 1.000e+05 | 2 | 2 | 2 |
| 20 | 1408804745 | 1.000e+06 | 1.000e+06 | 1.000e+05 | 2 | 2 | 2 |
| 20 | 1408807503 | 5.000e+04 | 6.000e+04 | 1.000e+05 | 1 | 1 | 2 |
| 20 | 1408807144 | 1.000e+05 | 1.000e+05 | 1.000e+05 | 1 | 1 | 2 |
| 20 | 1408809849 | 5.000e+04 | 5.000e+04 | 1.000e+05 | 2 | 2 | 2 |
| 20 | 1408803676 | 1.000e+05 | 1.000e+05 | 1.000e+05 | 1 | 1 | 2 |
| 20 | 1408817241 | 6.000e+03 | 6.000e+03 | 1.000e+05 | 3 | 3 | 2 |
| 20 | 1408811947 | 3.600e+04 | 1.500e+05 | 1.000e+05 | 0 | 0 | 2 |
| 20 | 1408811461 | 1.500e+05 | 1.500e+05 | 1.000e+05 | 3 | 3 | 2 |
| 20 | 1408814406 | 5.000e+04 | 5.000e+04 | 1.000e+05 | 1 | 1 | 2 |
| 20 | 1408806191 | 3.000e+03 | 3.000e+03 | 1.000e+05 | 1 | 1 | 2 |
| 20 | 1408814584 | 5.000e+06 | 5.000e+06 | 1.000e+05 | 0 | 0 | 2 |
| 20 | 1408819661 | 5.000e+03 | 2.000e+04 | 1.000e+05 | 0 | 0 | 2 |
| 20 | 1408812882 | 1.000e+06 | 1.000e+06 | 1.000e+05 | 1 | 2 | 2 |
| 20 | 1408808711 | 2.000e+04 | 2.000e+04 | 1.000e+05 | 3 | 3 | 2 |
| 20 | 1408801183 | 6.000e+05 | 6.000e+05 | 1.000e+05 | 2 | 3 | 2 |
| 20 | 1408809769 | 1.000e+04 | 1.000e+04 | 1.000e+05 | 1 | 1 | 2 |
| 20 | 1408799162 | 2.000e+05 | 2.000e+05 | 1.000e+05 | 2 | 2 | 2 |
| 20 | 1408805091 | 1.000e+04 | 1.000e+04 | 1.000e+05 | 2 | 2 | 2 |
| 20 | 1408806651 | 5.000e+06 | 4.000e+06 | 1.000e+05 | 1 | 1 | 2 |
| 20 | 1408816332 | 1.500e+05 | 1.500e+05 | 1.000e+05 | 4 | 4 | 2 |
| 20 | 1408809326 | 6.500e+04 | 6.500e+04 | 1.000e+05 | 3 | 3 | 2 |
| 20 | 1408808791 | 2.000e+04 | 2.000e+04 | 1.000e+05 | 2 | 3 | 2 |
| 20 | 1408801643 | 1.000e+04 | 1.000e+05 | 1.000e+05 | 0 | 1 | 2 |
| 20 | 1408807809 | 1.000e+06 | 1.000e+06 | 1.000e+05 | 2 | 2 | 2 |
| 20 | 1408797111 | 3.000e+06 | 3.000e+06 | 1.000e+05 | 3 | 3 | 2 |
| 20 | 1408808623 | 5.000e+04 | 5.000e+04 | 1.000e+05 | 2 | 2 | 2 |
| 20 | 1408800367 | 1.000e+04 | 1.000e+04 | 1.000e+05 | 3 | 3 | 2 |
| 20 | 1408808143 | 2.000e+06 | 2.000e+06 | 1.000e+05 | 3 | 1 | 2 |
| 20 | 1408802365 | 1.200e+05 | 1.200e+05 | 1.000e+05 | 1 | 1 | 2 |
| 20 | 1408812007 | 1.000e+04 | 1.000e+04 | 1.000e+05 | 0 | 3 | 2 |
| 20 | 1408812647 | 6.000e+04 | 6.000e+04 | 1.000e+05 | 1 | 1 | 2 |
| 20 | 1408805344 | 3.000e+05 | 3.000e+05 | 1.000e+05 | 1 | 1 | 2 |
| 20 | 1408816236 | 1.000e+04 | 5.000e+04 | 1.000e+05 | 1 | 3 | 2 |
| 20 | 1408814110 | 2.000e+04 | 1.500e+04 | 1.000e+05 | 0 | 0 | 2 |
| 20 | 1408802237 | 3.400e+03 | 1.000e+04 | 1.000e+05 | 2 | 2 | 2 |
| 20 | 1408811941 | 8.000e+23 | 8.000e+23 | 1.000e+05 | 3 | 3 | 2 |
| 20 | 1408820913 | 3.500e+03 | 3.500e+03 | 1.000e+05 | 3 | 3 | 2 |
| 20 | 1408812832 | 1.000e+04 | 8.000e+04 | 1.000e+05 | 2 | 3 | 2 |
