# Supplementary material for: Opinion Formation by Social Influence: From Experiments to Modeling
Source: PubMed Central journal article supplement (PMC4627778; doi:10.1371/journal.pone.0140406), 2015-10-30
Supplement: pone.0140406.s003.pdf [file pone.0140406.s003.pdf]

**S2 Table. Frequencies of confidence changes measured in the experiment.**

| <b>confidence change <math>\Delta c</math></b> | <b>frequency</b> |
|------------------------------------------------|------------------|
| -5                                             | 0.000            |
| -4                                             | 0.000            |
| -3                                             | 0.000            |
| -2                                             | 0.005            |
| -1                                             | 0.021            |
| 0                                              | 0.711            |
| 1                                              | 0.161            |
| 2                                              | 0.066            |
| 3                                              | 0.028            |
| 4                                              | 0.008            |
| 5                                              | 0.000            |
